# Supplementary material for: A comparative study on normal and obese mice indicates that the secretome of mesenchymal stromal cells is influenced by tissue environment and physiopathological conditions
Source: PubMed Central journal article supplement (PMC7388533; doi:10.1186/s12964-020-00614-w), 2020-07-29

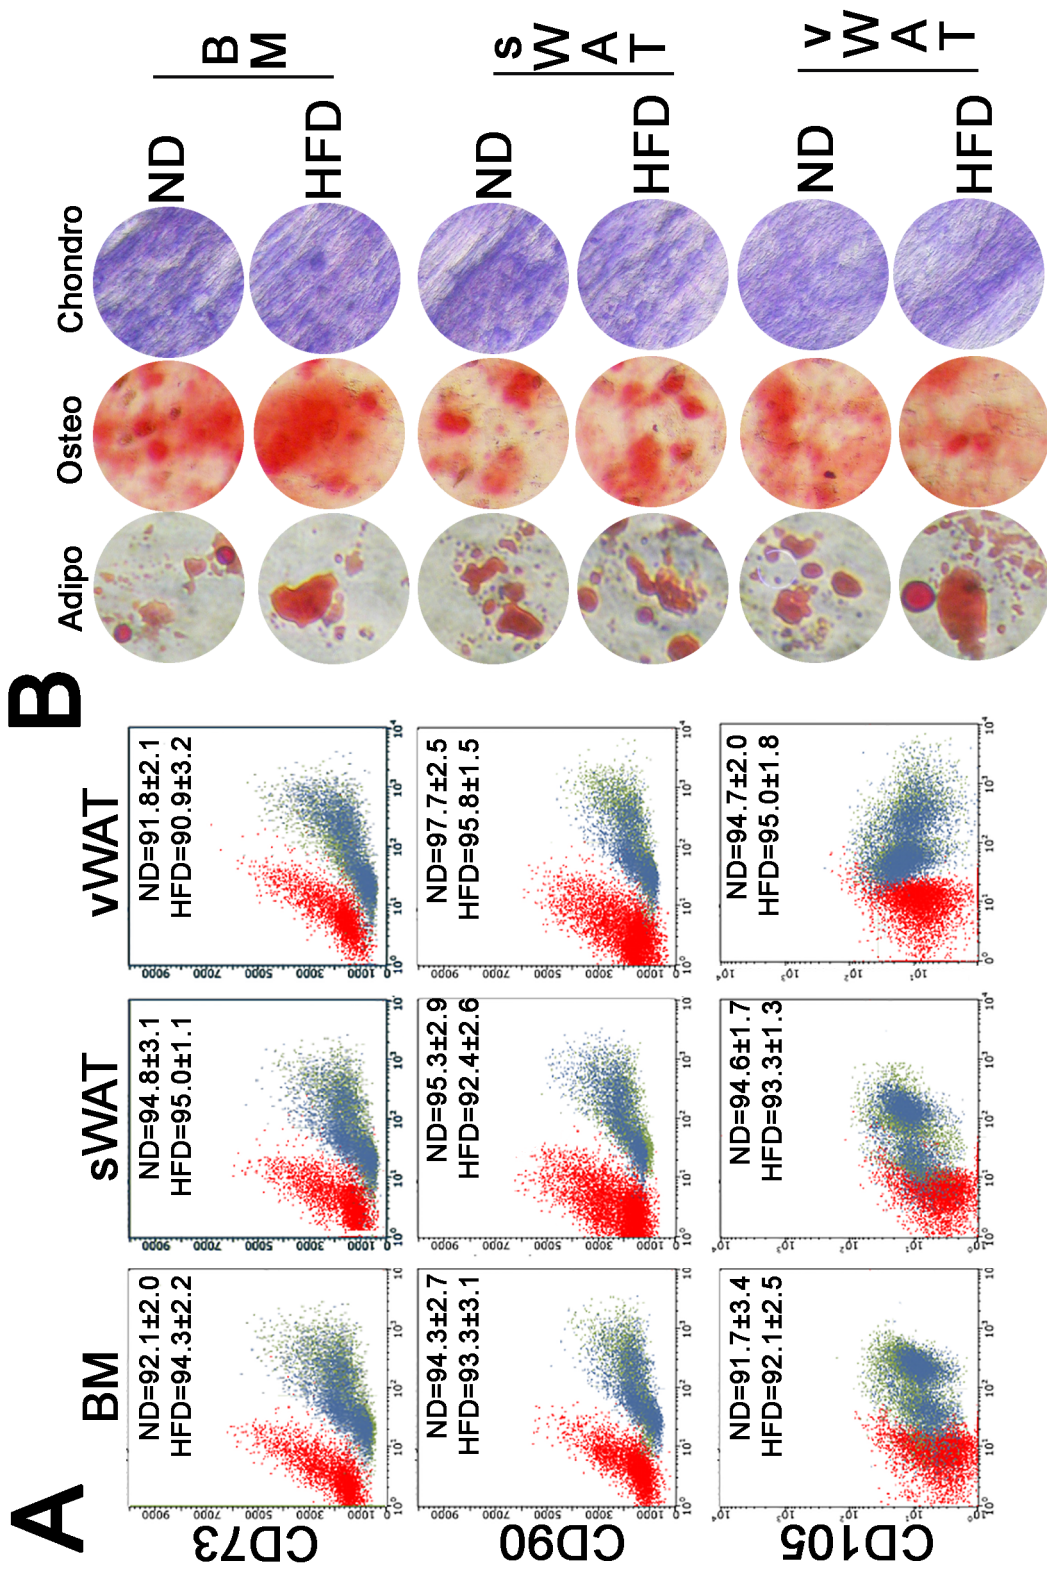

Supplement: 12964_2020_614_MOESM2_ESM.pdf [file 12964_2020_614_MOESM2_ESM.pdf]
