# Supplementary material for: A comparative study on normal and obese mice indicates that the secretome of mesenchymal stromal cells is influenced by tissue environment and physiopathological conditions
Source: PubMed Central journal article supplement (PMC7388533; doi:10.1186/s12964-020-00614-w), 2020-07-29
Supplement: 12964_2020_614_MOESM4_ESM.pdf [file 12964_2020_614_MOESM4_ESM.pdf]

**PANTHER 15.0 released!**

**Analysis Summary:** Please report in publication [?](#) **vWAT-MSC secretome from ND mice**

**Analysis Type:** PANTHER Overrepresentation Test (Released 20190711)

---

**Annotation Version and Release Date:** PANTHER version 15 Released 2020-02-14

---

**Analyzed List:** Client Text Box Input (Mus musculus) [Change](#)

---

**Reference List:** Mus musculus (all genes in database) [Change](#)

---

**Annotation Data Set:** PANTHER GO-Slim Cellular Component [?](#)

---

**Test Type:**  Fisher's Exact  Binomial

---

**Correction:**  Calculate False Discovery Rate  Use the Bonferroni correction for multiple testing [?](#)  No correction

**Results** [?](#)

|                               | Reference list                     | Client Text Box Input          |
|-------------------------------|------------------------------------|--------------------------------|
| Uniquely Mapped IDs:          | <a href="#">22265</a> out of 22265 | <a href="#">361</a> out of 363 |
| Unmapped IDs:                 | <a href="#">0</a>                  | <a href="#">0</a>              |
| Multiple mapping information: | <a href="#">0</a>                  | <a href="#">5</a>              |

Export [Table](#) [XML with user input ids](#) [JSON with user input ids](#) View: [-- Please select a chart to display --](#)

Displaying only results for FDR P < 0.05, [click here to display all results](#)

|                                                                | Mus musculus (REF)   | Client Text Box Input (Hierarchy NEW! <a href="#">?</a> ) |          |                 |     |             |          |
|----------------------------------------------------------------|----------------------|-----------------------------------------------------------|----------|-----------------|-----|-------------|----------|
|                                                                | #                    | #                                                         | expected | Fold Enrichment | +/- | raw P value | FDR      |
| <a href="#">PANTHER GO-Slim Cellular Component</a>             |                      |                                                           |          |                 |     |             |          |
| <a href="#">proteasome core complex, alpha-subunit complex</a> | <a href="#">8</a>    | <a href="#">7</a>                                         | .13      | 53.67           | +   | 1.49E-09    | 7.03E-08 |
| ↳ <a href="#">proteasome complex</a>                           | <a href="#">39</a>   | <a href="#">13</a>                                        | .64      | 20.45           | +   | 1.36E-12    | 1.18E-10 |
| ↳ <a href="#">endopeptidase complex</a>                        | <a href="#">39</a>   | <a href="#">13</a>                                        | .64      | 20.45           | +   | 1.36E-12    | 1.41E-10 |
| ↳ <a href="#">peptidase complex</a>                            | <a href="#">55</a>   | <a href="#">13</a>                                        | .90      | 14.50           | +   | 5.33E-11    | 3.08E-09 |
| ↳ <a href="#">intracellular part</a>                           | <a href="#">6691</a> | <a href="#">150</a>                                       | 109.09   | 1.38            | +   | 6.41E-06    | 1.33E-04 |
| ↳ <a href="#">intracellular</a>                                | <a href="#">6721</a> | <a href="#">151</a>                                       | 109.58   | 1.38            | +   | 5.01E-06    | 1.08E-04 |
| <a href="#">Arp2/3 protein complex</a>                         | <a href="#">9</a>    | <a href="#">6</a>                                         | .15      | 40.89           | +   | 7.25E-08    | 2.09E-06 |
| ↳ <a href="#">cytoskeletal part</a>                            | <a href="#">486</a>  | <a href="#">19</a>                                        | 7.92     | 2.40            | +   | 8.27E-04    | 1.02E-02 |
| ↳ <a href="#">cytoskeleton</a>                                 | <a href="#">586</a>  | <a href="#">21</a>                                        | 9.55     | 2.20            | +   | 1.41E-03    | 1.70E-02 |
| ↳ <a href="#">intracellular non-membrane-bounded organelle</a> | <a href="#">1344</a> | <a href="#">42</a>                                        | 21.91    | 1.92            | +   | 8.78E-05    | 1.47E-03 |
| ↳ <a href="#">non-membrane-bounded organelle</a>               | <a href="#">1344</a> | <a href="#">42</a>                                        | 21.91    | 1.92            | +   | 8.78E-05    | 1.43E-03 |
| ↳ <a href="#">actin cytoskeleton</a>                           | <a href="#">160</a>  | <a href="#">17</a>                                        | 2.61     | 6.52            | +   | 4.32E-09    | 1.61E-07 |
| <a href="#">collagen trimer</a>                                | <a href="#">17</a>   | <a href="#">4</a>                                         | .28      | 14.43           | +   | 3.14E-04    | 4.54E-03 |
| <a href="#">cytosolic small ribosomal subunit</a>              | <a href="#">40</a>   | <a href="#">7</a>                                         | .65      | 10.73           | +   | 9.34E-06    | 1.87E-04 |
| ↳ <a href="#">cytosolic part</a>                               | <a href="#">162</a>  | <a href="#">20</a>                                        | 2.64     | 7.57            | +   | 1.58E-11    | 1.02E-09 |
| ↳ <a href="#">cytoplasmic part</a>                             | <a href="#">2902</a> | <a href="#">86</a>                                        | 47.31    | 1.82            | +   | 4.63E-08    | 1.42E-06 |

|                                          |                       |                     |        |       |   |          |          |
|------------------------------------------|-----------------------|---------------------|--------|-------|---|----------|----------|
| ↳cytoplasm                               | <a href="#">4183</a>  | <a href="#">138</a> | 68.20  | 2.02  | + | 2.34E-17 | 6.09E-15 |
| ↳cytosol                                 | <a href="#">753</a>   | <a href="#">52</a>  | 12.28  | 4.24  | + | 9.56E-18 | 4.97E-15 |
| ↳cytosolic ribosome                      | <a href="#">104</a>   | <a href="#">17</a>  | 1.70   | 10.03 | + | 1.03E-11 | 7.67E-10 |
| ↳ribosome                                | <a href="#">151</a>   | <a href="#">17</a>  | 2.46   | 6.91  | + | 1.94E-09 | 8.41E-08 |
| ↳ribonucleoprotein complex               | <a href="#">463</a>   | <a href="#">21</a>  | 7.55   | 2.78  | + | 4.10E-05 | 7.35E-04 |
| ↳small ribosomal subunit                 | <a href="#">57</a>    | <a href="#">7</a>   | .93    | 7.53  | + | 7.31E-05 | 1.27E-03 |
| ↳ribosomal subunit                       | <a href="#">143</a>   | <a href="#">17</a>  | 2.33   | 7.29  | + | 9.11E-10 | 4.74E-08 |
| collagen-containing extracellular matrix | <a href="#">66</a>    | <a href="#">11</a>  | 1.08   | 10.22 | + | 4.04E-08 | 1.31E-06 |
| ↳extracellular matrix                    | <a href="#">177</a>   | <a href="#">18</a>  | 2.89   | 6.24  | + | 2.85E-09 | 1.14E-07 |
| ↳extracellular region part               | <a href="#">1253</a>  | <a href="#">59</a>  | 20.43  | 2.89  | + | 6.00E-13 | 7.80E-11 |
| ↳extracellular region                    | <a href="#">1253</a>  | <a href="#">59</a>  | 20.43  | 2.89  | + | 6.00E-13 | 1.04E-10 |
| cytosolic large ribosomal subunit        | <a href="#">64</a>    | <a href="#">10</a>  | 1.04   | 9.58  | + | 2.88E-07 | 7.13E-06 |
| ↳large ribosomal subunit                 | <a href="#">86</a>    | <a href="#">10</a>  | 1.40   | 7.13  | + | 3.31E-06 | 7.82E-05 |
| actin filament                           | <a href="#">70</a>    | <a href="#">9</a>   | 1.14   | 7.89  | + | 4.88E-06 | 1.10E-04 |
| ↳polymeric cytoskeletal fiber            | <a href="#">246</a>   | <a href="#">11</a>  | 4.01   | 2.74  | + | 3.06E-03 | 3.62E-02 |
| ↳supramolecular fiber                    | <a href="#">298</a>   | <a href="#">15</a>  | 4.86   | 3.09  | + | 1.77E-04 | 2.80E-03 |
| ↳supramolecular polymer                  | <a href="#">301</a>   | <a href="#">15</a>  | 4.91   | 3.06  | + | 1.97E-04 | 3.01E-03 |
| ↳supramolecular complex                  | <a href="#">301</a>   | <a href="#">15</a>  | 4.91   | 3.06  | + | 1.97E-04 | 2.92E-03 |
| extracellular space                      | <a href="#">1169</a>  | <a href="#">49</a>  | 19.06  | 2.57  | + | 4.59E-09 | 1.59E-07 |
| Unclassified                             | <a href="#">12713</a> | <a href="#">156</a> | 207.27 | .75   | - | 1.03E-07 | 2.68E-06 |
| integral component of plasma membrane    | <a href="#">770</a>   | <a href="#">2</a>   | 12.55  | .16   | - | 6.31E-04 | 8.20E-03 |
| ↳integral component of membrane          | <a href="#">1114</a>  | <a href="#">5</a>   | 18.16  | .28   | - | 5.29E-04 | 7.05E-03 |
| ↳intrinsic component of membrane         | <a href="#">1141</a>  | <a href="#">5</a>   | 18.60  | .27   | - | 3.84E-04 | 5.39E-03 |
| ↳membrane part                           | <a href="#">2301</a>  | <a href="#">14</a>  | 37.51  | .37   | - | 1.02E-05 | 1.97E-04 |
| ↳membrane                                | <a href="#">3585</a>  | <a href="#">35</a>  | 58.45  | .60   | - | 5.11E-04 | 7.00E-03 |
| ↳intrinsic component of plasma membrane  | <a href="#">777</a>   | <a href="#">2</a>   | 12.67  | .16   | - | 6.51E-04 | 8.26E-03 |
| ↳plasma membrane part                    | <a href="#">1622</a>  | <a href="#">8</a>   | 26.44  | .30   | - | 3.46E-05 | 6.42E-04 |

**PANTHER 15.0 released!**

**Analysis Summary:** Please report in publication [?](#) **sWAT-MSC secretome from ND mice**

**Analysis Type:** PANTHER Overrepresentation Test (Released 20190711)

---

**Annotation Version and Release Date:** PANTHER version 15 Released 2020-02-14

---

**Analyzed List:** Client Text Box Input (Mus musculus) [Change](#)

---

**Reference List:** Mus musculus (all genes in database) [Change](#)

---

**Annotation Data Set:** PANTHER GO-Slim Cellular Component [?](#)

---

**Test Type:**  Fisher's Exact  Binomial

---

**Correction:**  Calculate False Discovery Rate  Use the Bonferroni correction for multiple testing [?](#)  No correction

**Results** [?](#)

|                               | Reference list                     | Client Text Box Input          |
|-------------------------------|------------------------------------|--------------------------------|
| Uniquely Mapped IDs:          | <a href="#">22265</a> out of 22265 | <a href="#">572</a> out of 569 |
| Unmapped IDs:                 | <a href="#">0</a>                  | <a href="#">1</a>              |
| Multiple mapping information: | <a href="#">0</a>                  | <a href="#">15</a>             |

Export [Table](#) [XML with user input ids](#) [JSON with user input ids](#) View: [-- Please select a chart to display --](#)

Displaying only results for FDR P < 0.05, [click here to display all results](#)

|                                                                | Mus musculus (REF)   | Client Text Box Input ( <a href="#">? Hierarchy NEW!</a> ) |
|----------------------------------------------------------------|----------------------|------------------------------------------------------------|
|                                                                | #                    | # expected Fold Enrichment +/- raw P value FDR             |
| <a href="#">PANTHER GO-Slim Cellular Component</a>             |                      |                                                            |
| <a href="#">proteasome core complex, alpha-subunit complex</a> | <a href="#">8</a>    | <a href="#">7</a> .20 34.24 + 3.11E-08 8.09E-07            |
| ↳ <a href="#">proteasome complex</a>                           | <a href="#">39</a>   | <a href="#">16</a> 1.00 16.05 + 2.17E-13 1.26E-11          |
| ↳ <a href="#">endopeptidase complex</a>                        | <a href="#">39</a>   | <a href="#">16</a> 1.00 16.05 + 2.17E-13 1.41E-11          |
| ↳ <a href="#">peptidase complex</a>                            | <a href="#">55</a>   | <a href="#">16</a> 1.41 11.38 + 1.62E-11 7.01E-10          |
| ↳ <a href="#">intracellular part</a>                           | <a href="#">6691</a> | <a href="#">208</a> 170.99 1.22 + 1.02E-03 1.02E-02        |
| ↳ <a href="#">intracellular</a>                                | <a href="#">6721</a> | <a href="#">209</a> 171.76 1.22 + 1.03E-03 1.01E-02        |
| <a href="#">Arp2/3 protein complex</a>                         | <a href="#">9</a>    | <a href="#">4</a> .23 17.39 + 2.28E-04 2.76E-03            |
| ↳ <a href="#">cytoskeletal part</a>                            | <a href="#">486</a>  | <a href="#">31</a> 12.42 2.50 + 8.92E-06 1.66E-04          |
| ↳ <a href="#">cytoskeleton</a>                                 | <a href="#">586</a>  | <a href="#">32</a> 14.98 2.14 + 1.09E-04 1.57E-03          |
| ↳ <a href="#">intracellular non-membrane-bounded organelle</a> | <a href="#">1344</a> | <a href="#">55</a> 34.35 1.60 + 9.72E-04 1.01E-02          |
| ↳ <a href="#">non-membrane-bounded organelle</a>               | <a href="#">1344</a> | <a href="#">55</a> 34.35 1.60 + 9.72E-04 9.91E-03          |
| ↳ <a href="#">actin cytoskeleton</a>                           | <a href="#">160</a>  | <a href="#">20</a> 4.09 4.89 + 2.64E-08 7.24E-07           |
| <a href="#">chaperonin-containing T-complex</a>                | <a href="#">10</a>   | <a href="#">4</a> .26 15.65 + 3.13E-04 3.62E-03            |
| ↳ <a href="#">cytosolic part</a>                               | <a href="#">162</a>  | <a href="#">27</a> 4.14 6.52 + 2.45E-13 1.27E-11           |
| ↳ <a href="#">cytoplasmic part</a>                             | <a href="#">2902</a> | <a href="#">128</a> 74.16 1.73 + 1.27E-09 4.13E-08         |
| ↳ <a href="#">cytoplasm</a>                                    | <a href="#">4183</a> | <a href="#">190</a> 106.90 1.78 + 3.64E-16 3.16E-14        |

|                                                       |                       |                     |        |       |   |          |          |
|-------------------------------------------------------|-----------------------|---------------------|--------|-------|---|----------|----------|
| ↳cytosol                                              | <a href="#">753</a>   | <a href="#">65</a>  | 19.24  | 3.38  | + | 1.35E-16 | 1.40E-14 |
| <a href="#">collagen trimer</a>                       | <a href="#">17</a>    | <a href="#">6</a>   | .43    | 13.81 | + | 1.64E-05 | 2.84E-04 |
| <a href="#">COPI vesicle coat</a>                     | <a href="#">9</a>     | <a href="#">3</a>   | .23    | 13.04 | + | 2.86E-03 | 2.52E-02 |
| ↳membrane                                             | <a href="#">3585</a>  | <a href="#">63</a>  | 91.62  | .69   | - | 9.31E-04 | 9.88E-03 |
| ↳COPI-coated vesicle                                  | <a href="#">9</a>     | <a href="#">3</a>   | .23    | 13.04 | + | 2.86E-03 | 2.57E-02 |
| ↳membrane coat                                        | <a href="#">36</a>    | <a href="#">5</a>   | .92    | 5.43  | + | 3.37E-03 | 2.88E-02 |
| ↳coated membrane                                      | <a href="#">36</a>    | <a href="#">5</a>   | .92    | 5.43  | + | 3.37E-03 | 2.83E-02 |
| ↳membrane part                                        | <a href="#">2301</a>  | <a href="#">31</a>  | 58.80  | .53   | - | 5.86E-05 | 8.97E-04 |
| <a href="#">cytosolic small ribosomal subunit</a>     | <a href="#">40</a>    | <a href="#">12</a>  | 1.02   | 11.74 | + | 4.25E-09 | 1.23E-07 |
| ↳cytosolic ribosome                                   | <a href="#">104</a>   | <a href="#">21</a>  | 2.66   | 7.90  | + | 4.74E-12 | 2.24E-10 |
| ↳ribosome                                             | <a href="#">151</a>   | <a href="#">21</a>  | 3.86   | 5.44  | + | 2.16E-09 | 6.60E-08 |
| ↳ribonucleoprotein complex                            | <a href="#">463</a>   | <a href="#">26</a>  | 11.83  | 2.20  | + | 3.19E-04 | 3.60E-03 |
| ↳small ribosomal subunit                              | <a href="#">57</a>    | <a href="#">12</a>  | 1.46   | 8.24  | + | 1.24E-07 | 3.06E-06 |
| ↳ribosomal subunit                                    | <a href="#">143</a>   | <a href="#">21</a>  | 3.65   | 5.75  | + | 8.95E-10 | 3.58E-08 |
| <a href="#">basement membrane</a>                     | <a href="#">27</a>    | <a href="#">6</a>   | .69    | 8.70  | + | 1.46E-04 | 2.05E-03 |
| ↳collagen-containing extracellular matrix             | <a href="#">66</a>    | <a href="#">23</a>  | 1.69   | 13.64 | + | 2.16E-17 | 2.80E-15 |
| ↳extracellular matrix                                 | <a href="#">177</a>   | <a href="#">36</a>  | 4.52   | 7.96  | + | 8.16E-20 | 1.42E-17 |
| ↳extracellular region part                            | <a href="#">1253</a>  | <a href="#">106</a> | 32.02  | 3.31  | + | 2.76E-26 | 7.19E-24 |
| ↳extracellular region                                 | <a href="#">1253</a>  | <a href="#">106</a> | 32.02  | 3.31  | + | 2.76E-26 | 1.44E-23 |
| <a href="#">cortical actin cytoskeleton</a>           | <a href="#">38</a>    | <a href="#">6</a>   | .97    | 6.18  | + | 7.36E-04 | 7.98E-03 |
| ↳cortical cytoskeleton                                | <a href="#">42</a>    | <a href="#">6</a>   | 1.07   | 5.59  | + | 1.18E-03 | 1.13E-02 |
| ↳cell cortex part                                     | <a href="#">91</a>    | <a href="#">8</a>   | 2.33   | 3.44  | + | 3.33E-03 | 2.89E-02 |
| ↳cell cortex                                          | <a href="#">121</a>   | <a href="#">9</a>   | 3.09   | 2.91  | + | 5.34E-03 | 4.27E-02 |
| <a href="#">actin filament</a>                        | <a href="#">70</a>    | <a href="#">11</a>  | 1.79   | 6.15  | + | 5.23E-06 | 1.05E-04 |
| ↳polymeric cytoskeletal fiber                         | <a href="#">246</a>   | <a href="#">19</a>  | 6.29   | 3.02  | + | 4.06E-05 | 6.40E-04 |
| ↳supramolecular fiber                                 | <a href="#">298</a>   | <a href="#">24</a>  | 7.62   | 3.15  | + | 2.09E-06 | 4.36E-05 |
| ↳supramolecular polymer                               | <a href="#">301</a>   | <a href="#">25</a>  | 7.69   | 3.25  | + | 7.65E-07 | 1.73E-05 |
| ↳supramolecular complex                               | <a href="#">301</a>   | <a href="#">25</a>  | 7.69   | 3.25  | + | 7.65E-07 | 1.66E-05 |
| <a href="#">cytosolic large ribosomal subunit</a>     | <a href="#">64</a>    | <a href="#">9</a>   | 1.64   | 5.50  | + | 8.17E-05 | 1.21E-03 |
| ↳large ribosomal subunit                              | <a href="#">86</a>    | <a href="#">9</a>   | 2.20   | 4.10  | + | 6.10E-04 | 6.75E-03 |
| <a href="#">adherens junction</a>                     | <a href="#">93</a>    | <a href="#">8</a>   | 2.38   | 3.37  | + | 3.77E-03 | 3.11E-02 |
| ↳anchoring junction                                   | <a href="#">102</a>   | <a href="#">8</a>   | 2.61   | 3.07  | + | 6.30E-03 | 4.96E-02 |
| <a href="#">extracellular space</a>                   | <a href="#">1169</a>  | <a href="#">82</a>  | 29.87  | 2.74  | + | 8.35E-16 | 6.20E-14 |
| Unclassified                                          | <a href="#">12713</a> | <a href="#">251</a> | 324.89 | .77   | - | 9.62E-10 | 3.57E-08 |
| <a href="#">integral component of plasma membrane</a> | <a href="#">770</a>   | <a href="#">5</a>   | 19.68  | .25   | - | 1.51E-04 | 2.06E-03 |
| ↳integral component of membrane                       | <a href="#">1114</a>  | <a href="#">8</a>   | 28.47  | .28   | - | 1.18E-05 | 2.11E-04 |
| ↳intrinsic component of membrane                      | <a href="#">1141</a>  | <a href="#">8</a>   | 29.16  | .27   | - | 6.02E-06 | 1.16E-04 |
| ↳intrinsic component of plasma membrane               | <a href="#">777</a>   | <a href="#">5</a>   | 19.86  | .25   | - | 1.52E-04 | 2.03E-03 |
| ↳plasma membrane part                                 | <a href="#">1622</a>  | <a href="#">17</a>  | 41.45  | .41   | - | 2.30E-05 | 3.75E-04 |
| <a href="#">nucleoplasm</a>                           | <a href="#">479</a>   | <a href="#">3</a>   | 12.24  | .25   | - | 4.36E-03 | 3.54E-02 |
| ↳nuclear lumen                                        | <a href="#">868</a>   | <a href="#">5</a>   | 22.18  | .23   | - | 2.06E-05 | 3.45E-04 |
| ↳nuclear part                                         | <a href="#">1243</a>  | <a href="#">7</a>   | 31.77  | .22   | - | 1.83E-07 | 4.34E-06 |
| ↳nucleus                                              | <a href="#">2974</a>  | <a href="#">51</a>  | 76.00  | .67   | - | 1.70E-03 | 1.58E-02 |
| ↳intracellular organelle lumen                        | <a href="#">951</a>   | <a href="#">8</a>   |        |       |   |          |          |

|                                           |                     |                   |       |     |   |          |          |
|-------------------------------------------|---------------------|-------------------|-------|-----|---|----------|----------|
|                                           |                     |                   | 24.30 | .33 | - | 1.90E-04 | 2.41E-03 |
| ↳ <a href="#">organelle lumen</a>         | <a href="#">951</a> | <a href="#">8</a> | 24.30 | .33 | - | 1.90E-04 | 2.36E-03 |
| ↳ <a href="#">membrane-enclosed lumen</a> | <a href="#">951</a> | <a href="#">8</a> | 24.30 | .33 | - | 1.90E-04 | 2.47E-03 |
| <a href="#">chromosomal part</a>          | <a href="#">364</a> | <a href="#">1</a> | 9.30  | .11 | - | 1.88E-03 | 1.72E-02 |
| ↳ <a href="#">chromosome</a>              | <a href="#">376</a> | <a href="#">1</a> | 9.61  | .10 | - | 1.29E-03 | 1.22E-02 |
| <a href="#">transferase complex</a>       | <a href="#">444</a> | <a href="#">1</a> | 11.35 | .09 | - | 3.00E-04 | 3.55E-03 |

**PANTHER 15.0 released!**

**Analysis Summary:** Please report in publication [?](#) **BM-MSC secretome from ND mice**

**Analysis Type:** PANTHER Overrepresentation Test (Released 20190711)

---

**Annotation Version and Release Date:** PANTHER version 15 Released 2020-02-14

---

**Analyzed List:** Client Text Box Input (Mus musculus) [Change](#)

---

**Reference List:** Mus musculus (all genes in database) [Change](#)

---

**Annotation Data Set:** PANTHER GO-Slim Cellular Component [?](#)

---

**Test Type:**  Fisher's Exact  Binomial

---

**Correction:**  Calculate False Discovery Rate  Use the Bonferroni correction for multiple testing [?](#)  No correction

**Results** [?](#)

|                               | Reference list                     | Client Text Box Input          |
|-------------------------------|------------------------------------|--------------------------------|
| Uniquely Mapped IDs:          | <a href="#">22265</a> out of 22265 | <a href="#">482</a> out of 482 |
| Unmapped IDs:                 | <a href="#">0</a>                  | <a href="#">3</a>              |
| Multiple mapping information: | <a href="#">0</a>                  | <a href="#">9</a>              |

Export [Table](#) [XML with user input ids](#) [JSON with user input ids](#) View: -- Please select a chart to display --

Displaying only results for FDR P < 0.05, [click here to display all results](#)

|                                                                | Mus musculus (REF)   | Client Text Box Input ( <a href="#">Hierarchy</a> <b>NEW!</b> <a href="#">?</a> ) |          |                 |     |             |          |
|----------------------------------------------------------------|----------------------|-----------------------------------------------------------------------------------|----------|-----------------|-----|-------------|----------|
|                                                                | #                    | #                                                                                 | expected | Fold Enrichment | +/- | raw P value | FDR      |
| <a href="#">PANTHER GO-Slim Cellular Component</a>             |                      |                                                                                   |          |                 |     |             |          |
| <a href="#">proteasome core complex, alpha-subunit complex</a> | <a href="#">8</a>    | <a href="#">6</a>                                                                 | .17      | 34.64           | +   | 2.28E-07    | 7.91E-06 |
| ↳ <a href="#">proteasome complex</a>                           | <a href="#">39</a>   | <a href="#">12</a>                                                                | .84      | 14.21           | +   | 5.37E-10    | 3.49E-08 |
| ↳ <a href="#">endopeptidase complex</a>                        | <a href="#">39</a>   | <a href="#">12</a>                                                                | .84      | 14.21           | +   | 5.37E-10    | 3.99E-08 |
| ↳ <a href="#">peptidase complex</a>                            | <a href="#">55</a>   | <a href="#">12</a>                                                                | 1.19     | 10.08           | +   | 1.49E-08    | 7.05E-07 |
| <a href="#">Arp2/3 protein complex</a>                         | <a href="#">9</a>    | <a href="#">4</a>                                                                 | .19      | 20.53           | +   | 1.22E-04    | 1.87E-03 |
| ↳ <a href="#">cytoskeletal part</a>                            | <a href="#">486</a>  | <a href="#">24</a>                                                                | 10.52    | 2.28            | +   | 2.70E-04    | 3.80E-03 |
| ↳ <a href="#">cytoskeleton</a>                                 | <a href="#">586</a>  | <a href="#">24</a>                                                                | 12.69    | 1.89            | +   | 3.85E-03    | 3.64E-02 |
| ↳ <a href="#">actin cytoskeleton</a>                           | <a href="#">160</a>  | <a href="#">19</a>                                                                | 3.46     | 5.49            | +   | 9.47E-09    | 4.92E-07 |
| <a href="#">collagen trimer</a>                                | <a href="#">17</a>   | <a href="#">7</a>                                                                 | .37      | 19.02           | +   | 4.65E-07    | 1.51E-05 |
| <a href="#">chaperonin-containing T-complex</a>                | <a href="#">10</a>   | <a href="#">3</a>                                                                 | .22      | 13.86           | +   | 2.31E-03    | 2.31E-02 |
| ↳ <a href="#">cytosolic part</a>                               | <a href="#">162</a>  | <a href="#">20</a>                                                                | 3.51     | 5.70            | +   | 2.10E-09    | 1.21E-07 |
| ↳ <a href="#">cytoplasmic part</a>                             | <a href="#">2902</a> | <a href="#">96</a>                                                                | 62.82    | 1.53            | +   | 2.99E-05    | 5.75E-04 |
| ↳ <a href="#">cytoplasm</a>                                    | <a href="#">4183</a> | <a href="#">140</a>                                                               | 90.55    | 1.55            | +   | 7.55E-08    | 3.02E-06 |
| ↳ <a href="#">cytosol</a>                                      | <a href="#">753</a>  | <a href="#">49</a>                                                                | 16.30    | 3.01            | +   | 3.34E-11    | 2.90E-09 |

|                                                            |                       |                     |        |        |   |          |          |
|------------------------------------------------------------|-----------------------|---------------------|--------|--------|---|----------|----------|
| <a href="#">basement membrane</a>                          | <a href="#">27</a>    | <a href="#">6</a>   | .58    | 10.27  | + | 5.98E-05 | 9.71E-04 |
| ↳ <a href="#">collagen-containing extracellular matrix</a> | <a href="#">66</a>    | <a href="#">22</a>  | 1.43   | 15.40  | + | 7.74E-18 | 8.05E-16 |
| ↳ <a href="#">extracellular matrix</a>                     | <a href="#">177</a>   | <a href="#">34</a>  | 3.83   | 8.87   | + | 2.66E-20 | 3.46E-18 |
| ↳ <a href="#">extracellular region part</a>                | <a href="#">1253</a>  | <a href="#">107</a> | 27.13  | 3.94   | + | 3.61E-33 | 9.39E-31 |
| ↳ <a href="#">extracellular region</a>                     | <a href="#">1253</a>  | <a href="#">107</a> | 27.13  | 3.94   | + | 3.61E-33 | 1.88E-30 |
| <a href="#">cytosolic small ribosomal subunit</a>          | <a href="#">40</a>    | <a href="#">7</a>   | .87    | 8.08   | + | 5.55E-05 | 9.31E-04 |
| ↳ <a href="#">cytosolic ribosome</a>                       | <a href="#">104</a>   | <a href="#">15</a>  | 2.25   | 6.66   | + | 3.46E-08 | 1.50E-06 |
| ↳ <a href="#">ribosome</a>                                 | <a href="#">151</a>   | <a href="#">15</a>  | 3.27   | 4.59   | + | 2.69E-06 | 7.36E-05 |
| ↳ <a href="#">ribonucleoprotein complex</a>                | <a href="#">463</a>   | <a href="#">22</a>  | 10.02  | 2.19   | + | 1.06E-03 | 1.26E-02 |
| ↳ <a href="#">small ribosomal subunit</a>                  | <a href="#">57</a>    | <a href="#">7</a>   | 1.23   | 5.67   | + | 4.02E-04 | 5.23E-03 |
| ↳ <a href="#">ribosomal subunit</a>                        | <a href="#">143</a>   | <a href="#">15</a>  | 3.10   | 4.85   | + | 1.44E-06 | 4.17E-05 |
| <a href="#">actin filament</a>                             | <a href="#">70</a>    | <a href="#">12</a>  | 1.52   | 7.92   | + | 1.55E-07 | 5.74E-06 |
| ↳ <a href="#">polymeric cytoskeletal fiber</a>             | <a href="#">246</a>   | <a href="#">14</a>  | 5.33   | 2.63   | + | 1.39E-03 | 1.48E-02 |
| ↳ <a href="#">supramolecular fiber</a>                     | <a href="#">298</a>   | <a href="#">19</a>  | 6.45   | 2.95   | + | 5.22E-05 | 9.36E-04 |
| ↳ <a href="#">supramolecular polymer</a>                   | <a href="#">301</a>   | <a href="#">20</a>  | 6.52   | 3.07   | + | 1.92E-05 | 3.99E-04 |
| ↳ <a href="#">supramolecular complex</a>                   | <a href="#">301</a>   | <a href="#">20</a>  | 6.52   | 3.07   | + | 1.92E-05 | 3.84E-04 |
| <a href="#">cortical actin cytoskeleton</a>                | <a href="#">38</a>    | <a href="#">6</a>   | .82    | 7.29   | + | 3.13E-04 | 4.17E-03 |
| ↳ <a href="#">cortical cytoskeleton</a>                    | <a href="#">42</a>    | <a href="#">6</a>   | .91    | 6.60   | + | 5.07E-04 | 6.42E-03 |
| ↳ <a href="#">cell cortex part</a>                         | <a href="#">91</a>    | <a href="#">9</a>   | 1.97   | 4.57   | + | 2.76E-04 | 3.78E-03 |
| ↳ <a href="#">cell cortex</a>                              | <a href="#">121</a>   | <a href="#">9</a>   | 2.62   | 3.44   | + | 1.83E-03 | 1.87E-02 |
| <a href="#">cytosolic large ribosomal subunit</a>          | <a href="#">64</a>    | <a href="#">8</a>   | 1.39   | 5.77   | + | 1.40E-04 | 2.08E-03 |
| ↳ <a href="#">large ribosomal subunit</a>                  | <a href="#">86</a>    | <a href="#">8</a>   | 1.86   | 4.30   | + | 8.68E-04 | 1.05E-02 |
| <a href="#">lysosome</a>                                   | <a href="#">114</a>   | <a href="#">9</a>   | 2.47   | 3.65   | + | 1.25E-03 | 1.44E-02 |
| ↳ <a href="#">lytic vacuole</a>                            | <a href="#">115</a>   | <a href="#">9</a>   | 2.49   | 3.62   | + | 1.32E-03 | 1.46E-02 |
| ↳ <a href="#">intracellular membrane-bounded organelle</a> | <a href="#">4662</a>  | <a href="#">73</a>  | 100.92 | .72    | - | 1.77E-03 | 1.84E-02 |
| ↳ <a href="#">membrane-bounded organelle</a>               | <a href="#">4721</a>  | <a href="#">76</a>  | 102.20 | .74    | - | 3.30E-03 | 3.24E-02 |
| <a href="#">extracellular space</a>                        | <a href="#">1169</a>  | <a href="#">83</a>  | 25.31  | 3.28   | + | 1.11E-20 | 1.92E-18 |
| Unclassified                                               | <a href="#">12713</a> | <a href="#">226</a> | 275.22 | .82    | - | 9.47E-06 | 2.34E-04 |
| <a href="#">nuclear lumen</a>                              | <a href="#">868</a>   | <a href="#">7</a>   | 18.79  | .37    | - | 3.69E-03 | 3.55E-02 |
| ↳ <a href="#">nuclear part</a>                             | <a href="#">1243</a>  | <a href="#">10</a>  | 26.91  | .37    | - | 2.54E-04 | 3.67E-03 |
| ↳ <a href="#">nucleus</a>                                  | <a href="#">2974</a>  | <a href="#">41</a>  | 64.38  | .64    | - | 1.37E-03 | 1.48E-02 |
| <a href="#">integral component of plasma membrane</a>      | <a href="#">770</a>   | <a href="#">2</a>   | 16.67  | .12    | - | 1.77E-05 | 3.83E-04 |
| ↳ <a href="#">integral component of membrane</a>           | <a href="#">1114</a>  | <a href="#">7</a>   | 24.12  | .29    | - | 6.87E-05 | 1.08E-03 |
| ↳ <a href="#">intrinsic component of membrane</a>          | <a href="#">1141</a>  | <a href="#">7</a>   | 24.70  | .28    | - | 5.09E-05 | 9.46E-04 |
| ↳ <a href="#">membrane part</a>                            | <a href="#">2301</a>  | <a href="#">20</a>  | 49.81  | .40    | - | 1.31E-06 | 4.01E-05 |
| ↳ <a href="#">membrane</a>                                 | <a href="#">3585</a>  | <a href="#">46</a>  | 77.61  | .59    | - | 5.30E-05 | 9.19E-04 |
| ↳ <a href="#">intrinsic component of plasma membrane</a>   | <a href="#">777</a>   | <a href="#">2</a>   | 16.82  | .12    | - | 1.19E-05 | 2.69E-04 |
| ↳ <a href="#">plasma membrane part</a>                     | <a href="#">1622</a>  | <a href="#">12</a>  | 35.11  | .34    | - | 6.91E-06 | 1.80E-04 |
| ↳ <a href="#">plasma membrane</a>                          | <a href="#">3243</a>  | <a href="#">45</a>  | 70.21  | .64    | - | 8.17E-04 | 1.01E-02 |
| <a href="#">transferase complex</a>                        | <a href="#">444</a>   | <a href="#">1</a>   | 9.61   | .10    | - | 1.30E-03 | 1.47E-02 |
| <a href="#">organelle envelope</a>                         | <a href="#">283</a>   | <a href="#">0</a>   | 6.13   | < 0.01 | - | 5.28E-03 | 4.81E-02 |
| ↳ <a href="#">envelope</a>                                 | <a href="#">283</a>   | <a href="#">0</a>   | 6.13   | < 0.01 | - | 5.28E-03 | 4.90E-02 |





**PANTHER 15.0 released!**

Analysis Summary: Please report in publication [vWAT-MSC secretome from ND mice](#)

**Analysis Type:** PANTHER Overrepresentation Test (Released 20190711)

---

**Annotation Version and Release Date:** PANTHER version 15 Released 2020-02-14

---

**Analyzed List:** Client Text Box Input (Mus musculus) [Change](#)

---

**Reference List:** Mus musculus (all genes in database) [Change](#)

---

**Annotation Data Set:** PANTHER Protein Class ?

---

**Test Type:**  Fisher's Exact  Binomial

---

**Correction:**  Calculate False Discovery Rate  Use the Bonferroni correction for multiple testing ?  No correction

Results ?

|                               | Reference list                     | Client Text Box Input          |
|-------------------------------|------------------------------------|--------------------------------|
| Uniquely Mapped IDs:          | <a href="#">22265</a> out of 22265 | <a href="#">361</a> out of 363 |
| Unmapped IDs:                 | <a href="#">0</a>                  | <a href="#">0</a>              |
| Multiple mapping information: | <a href="#">0</a>                  | <a href="#">5</a>              |

Export [Table](#) [XML with user input ids](#) [JSON with user input ids](#) View: -- Please select a chart to display --

Displaying only results for FDR P < 0.05, [click here to display all results](#)

|                                                               | Mus musculus (REF)   | Client Text Box Input (▼ Hierarchy NEW! <span style="float: right;">?</span> ) |          |                 |     |             |          |
|---------------------------------------------------------------|----------------------|--------------------------------------------------------------------------------|----------|-----------------|-----|-------------|----------|
| PANTHER Protein Class                                         | #                    | #                                                                              | expected | Fold Enrichment | +/- | raw P value | FDR      |
| <a href="#">Hsp90 family chaperone</a>                        | <a href="#">4</a>    | <a href="#">3</a>                                                              | .07      | 46.00           | +   | 1.37E-04    | 1.40E-03 |
| ↳ <a href="#">chaperone</a>                                   | <a href="#">74</a>   | <a href="#">8</a>                                                              | 1.21     | 6.63            | +   | 5.15E-05    | 5.58E-04 |
| <a href="#">non-motor actin binding protein</a>               | <a href="#">93</a>   | <a href="#">17</a>                                                             | 1.52     | 11.21           | +   | 2.12E-12    | 8.25E-11 |
| ↳ <a href="#">actin or actin-binding cytoskeletal protein</a> | <a href="#">236</a>  | <a href="#">33</a>                                                             | 3.85     | 8.58            | +   | 1.04E-19    | 2.03E-17 |
| ↳ <a href="#">cytoskeletal protein</a>                        | <a href="#">492</a>  | <a href="#">36</a>                                                             | 8.02     | 4.49            | +   | 3.03E-13    | 1.48E-11 |
| <a href="#">peroxidase</a>                                    | <a href="#">23</a>   | <a href="#">4</a>                                                              | .37      | 10.67           | +   | 8.54E-04    | 7.24E-03 |
| ↳ <a href="#">oxidoreductase</a>                              | <a href="#">418</a>  | <a href="#">24</a>                                                             | 6.81     | 3.52            | +   | 2.37E-07    | 4.20E-06 |
| ↳ <a href="#">metabolite interconversion enzyme</a>           | <a href="#">1428</a> | <a href="#">50</a>                                                             | 23.28    | 2.15            | +   | 5.29E-07    | 7.94E-06 |
| <a href="#">actin and actin related protein</a>               | <a href="#">30</a>   | <a href="#">5</a>                                                              | .49      | 10.22           | +   | 2.26E-04    | 2.20E-03 |
| <a href="#">calmodulin-related</a>                            | <a href="#">62</a>   | <a href="#">8</a>                                                              | 1.01     | 7.91            | +   | 1.61E-05    | 1.85E-04 |
| ↳ <a href="#">calcium-binding protein</a>                     | <a href="#">79</a>   | <a href="#">13</a>                                                             | 1.29     | 10.09           | +   | 2.68E-09    | 6.54E-08 |
| <a href="#">extracellular matrix structural protein</a>       | <a href="#">73</a>   | <a href="#">9</a>                                                              | 1.19     | 7.56            | +   | 6.66E-06    | 8.12E-05 |
| ↳ <a href="#">extracellular matrix protein</a>                | <a href="#">161</a>  | <a href="#">14</a>                                                             | 2.62     | 5.33            | +   | 9.63E-07    | 1.34E-05 |

|                                                           |                       |                     |        |        |   |          |          |
|-----------------------------------------------------------|-----------------------|---------------------|--------|--------|---|----------|----------|
| <a href="#">protease inhibitor</a>                        | <a href="#">157</a>   | <a href="#">18</a>  | 2.56   | 7.03   | + | 4.95E-10 | 1.61E-08 |
| ↳ <a href="#">protein-binding activity modulator</a>      | <a href="#">632</a>   | <a href="#">28</a>  | 10.30  | 2.72   | + | 3.30E-06 | 4.29E-05 |
| <a href="#">ribosomal protein</a>                         | <a href="#">159</a>   | <a href="#">16</a>  | 2.59   | 6.17   | + | 2.50E-08 | 5.42E-07 |
| ↳ <a href="#">translational protein</a>                   | <a href="#">288</a>   | <a href="#">23</a>  | 4.70   | 4.90   | + | 1.43E-09 | 3.99E-08 |
| <a href="#">reductase</a>                                 | <a href="#">51</a>    | <a href="#">5</a>   | .83    | 6.01   | + | 2.02E-03 | 1.46E-02 |
| <a href="#">dehydrogenase</a>                             | <a href="#">119</a>   | <a href="#">8</a>   | 1.94   | 4.12   | + | 1.04E-03 | 8.44E-03 |
| <a href="#">translation factor</a>                        | <a href="#">95</a>    | <a href="#">6</a>   | 1.55   | 3.87   | + | 5.78E-03 | 3.76E-02 |
| Unclassified                                              | <a href="#">12347</a> | <a href="#">131</a> | 201.30 | .65    | - | 2.46E-13 | 1.60E-11 |
| <a href="#">immunoglobulin</a>                            | <a href="#">389</a>   | <a href="#">0</a>   | 6.34   | < 0.01 | - | 3.42E-03 | 2.30E-02 |
| ↳ <a href="#">defense/immunity protein</a>                | <a href="#">600</a>   | <a href="#">1</a>   | 9.78   | .10    | - | 1.35E-03 | 1.02E-02 |
| <a href="#">C2H2 zinc finger transcription factor</a>     | <a href="#">424</a>   | <a href="#">0</a>   | 6.91   | < 0.01 | - | 2.46E-03 | 1.71E-02 |
| ↳ <a href="#">zinc finger transcription factor</a>        | <a href="#">502</a>   | <a href="#">0</a>   | 8.18   | < 0.01 | - | 4.68E-04 | 4.15E-03 |
| ↳ <a href="#">DNA-binding transcription factor</a>        | <a href="#">970</a>   | <a href="#">0</a>   | 15.81  | < 0.01 | - | 2.52E-07 | 4.10E-06 |
| ↳ <a href="#">gene-specific transcriptional regulator</a> | <a href="#">1054</a>  | <a href="#">0</a>   | 17.18  | < 0.01 | - | 4.67E-08 | 9.11E-07 |
| <a href="#">G-protein coupled receptor</a>                | <a href="#">568</a>   | <a href="#">0</a>   | 9.26   | < 0.01 | - | 2.33E-04 | 2.16E-03 |
| ↳ <a href="#">transmembrane signal receptor</a>           | <a href="#">712</a>   | <a href="#">2</a>   | 11.61  | .17    | - | 1.26E-03 | 9.79E-03 |

**PANTHER 15.0 released!**

**Analysis Summary:** Please report in publication [?](#) **sWAT-MSC secretome from ND mice**

**Analysis Type:** PANTHER Overrepresentation Test (Released 20190711)

---

**Annotation Version and Release Date:** PANTHER version 15 Released 2020-02-14

---

**Analyzed List:** Client Text Box Input (Mus musculus) [Change](#)

---

**Reference List:** Mus musculus (all genes in database) [Change](#)

---

**Annotation Data Set:**  [?](#)

---

**Test Type:**  Fisher's Exact  Binomial

---

**Correction:**  Calculate False Discovery Rate  Use the Bonferroni correction for multiple testing [?](#)  No correction

**Results** [?](#)

|                               | Reference list                     | Client Text Box Input          |
|-------------------------------|------------------------------------|--------------------------------|
| Uniquely Mapped IDs:          | <a href="#">22265</a> out of 22265 | <a href="#">572</a> out of 569 |
| Unmapped IDs:                 | <a href="#">0</a>                  | <a href="#">1</a>              |
| Multiple mapping information: | 0                                  | <a href="#">15</a>             |

Export [Table](#) [XML with user input ids](#) [JSON with user input ids](#) View:

Displaying only results for FDR P < 0.05, [click here to display all results](#)

| PANTHER Protein Class                                         | Mus musculus (REF)  | Client Text Box Input <span style="float: right;">(▼ Hierarchy NEW! <a href="#">?</a>)</span> |          |                 |     |             |          |
|---------------------------------------------------------------|---------------------|-----------------------------------------------------------------------------------------------|----------|-----------------|-----|-------------|----------|
|                                                               | #                   | #                                                                                             | expected | Fold Enrichment | +/- | raw P value | FDR      |
| <a href="#">Hsp90 family chaperone</a>                        | <a href="#">4</a>   | <a href="#">3</a>                                                                             | .10      | 29.35           | +   | 5.00E-04    | 3.36E-03 |
| ↳ <a href="#">chaperone</a>                                   | <a href="#">74</a>  | <a href="#">14</a>                                                                            | 1.89     | 7.40            | +   | 3.59E-08    | 5.39E-07 |
| <a href="#">chaperonin</a>                                    | <a href="#">13</a>  | <a href="#">7</a>                                                                             | .33      | 21.07           | +   | 3.36E-07    | 4.68E-06 |
| <a href="#">tubulin</a>                                       | <a href="#">20</a>  | <a href="#">6</a>                                                                             | .51      | 11.74           | +   | 3.51E-05    | 3.11E-04 |
| ↳ <a href="#">cytoskeletal protein</a>                        | <a href="#">492</a> | <a href="#">49</a>                                                                            | 12.57    | 3.90            | +   | 6.68E-15    | 3.26E-13 |
| <a href="#">extracellular matrix structural protein</a>       | <a href="#">73</a>  | <a href="#">18</a>                                                                            | 1.87     | 9.65            | +   | 9.20E-12    | 2.99E-10 |
| ↳ <a href="#">extracellular matrix protein</a>                | <a href="#">161</a> | <a href="#">28</a>                                                                            | 4.11     | 6.81            | +   | 3.45E-14    | 1.35E-12 |
| <a href="#">non-motor actin binding protein</a>               | <a href="#">93</a>  | <a href="#">17</a>                                                                            | 2.38     | 7.15            | +   | 1.97E-09    | 3.19E-08 |
| ↳ <a href="#">actin or actin-binding cytoskeletal protein</a> | <a href="#">236</a> | <a href="#">37</a>                                                                            | 6.03     | 6.13            | +   | 4.91E-17    | 3.19E-15 |
| <a href="#">aminoacyl-tRNA synthetase</a>                     | <a href="#">34</a>  | <a href="#">6</a>                                                                             | .87      | 6.91            | +   | 4.35E-04    | 3.03E-03 |
| ↳ <a href="#">translational protein</a>                       | <a href="#">288</a> | <a href="#">32</a>                                                                            | 7.36     | 4.35            | +   | 2.91E-11    | 7.09E-10 |
| <a href="#">actin and actin related protein</a>               | <a href="#">30</a>  | <a href="#">5</a>                                                                             | .77      | 6.52            | +   | 1.65E-03    | 9.47E-03 |
| <a href="#">calmodulin-related</a>                            | <a href="#">62</a>  | <a href="#">10</a>                                                                            | 1.58     | 6.31            | +   | 1.14E-05    | 1.11E-04 |

|                                                           |                       |                     |        |        |   |          |          |
|-----------------------------------------------------------|-----------------------|---------------------|--------|--------|---|----------|----------|
| ↳ <a href="#">calcium-binding protein</a>                 | <a href="#">79</a>    | <a href="#">16</a>  | 2.02   | 7.93   | + | 1.61E-09 | 2.85E-08 |
| <a href="#">protease inhibitor</a>                        | <a href="#">157</a>   | <a href="#">24</a>  | 4.01   | 5.98   | + | 2.66E-11 | 7.41E-10 |
| ↳ <a href="#">protein-binding activity modulator</a>      | <a href="#">632</a>   | <a href="#">37</a>  | 16.15  | 2.29   | + | 6.64E-06 | 7.19E-05 |
| <a href="#">actin binding motor protein</a>               | <a href="#">27</a>    | <a href="#">4</a>   | .69    | 5.80   | + | 7.04E-03 | 3.71E-02 |
| <a href="#">ribosomal protein</a>                         | <a href="#">159</a>   | <a href="#">17</a>  | 4.06   | 4.18   | + | 2.11E-06 | 2.42E-05 |
| <a href="#">growth factor</a>                             | <a href="#">90</a>    | <a href="#">9</a>   | 2.30   | 3.91   | + | 8.24E-04 | 5.18E-03 |
| ↳ <a href="#">intercellular signal molecule</a>           | <a href="#">343</a>   | <a href="#">20</a>  | 8.77   | 2.28   | + | 9.51E-04 | 5.80E-03 |
| <a href="#">translation initiation factor</a>             | <a href="#">60</a>    | <a href="#">6</a>   | 1.53   | 3.91   | + | 5.99E-03 | 3.24E-02 |
| ↳ <a href="#">translation factor</a>                      | <a href="#">95</a>    | <a href="#">9</a>   | 2.43   | 3.71   | + | 1.17E-03 | 6.93E-03 |
| <a href="#">metalloprotease</a>                           | <a href="#">167</a>   | <a href="#">13</a>  | 4.27   | 3.05   | + | 6.06E-04 | 3.94E-03 |
| ↳ <a href="#">protease</a>                                | <a href="#">597</a>   | <a href="#">37</a>  | 15.26  | 2.43   | + | 1.83E-06 | 2.23E-05 |
| <a href="#">oxidoreductase</a>                            | <a href="#">418</a>   | <a href="#">25</a>  | 10.68  | 2.34   | + | 1.53E-04 | 1.15E-03 |
| ↳ <a href="#">metabolite interconversion enzyme</a>       | <a href="#">1428</a>  | <a href="#">64</a>  | 36.49  | 1.75   | + | 2.16E-05 | 2.01E-04 |
| <a href="#">serine protease</a>                           | <a href="#">229</a>   | <a href="#">13</a>  | 5.85   | 2.22   | + | 1.01E-02 | 4.94E-02 |
| Unclassified                                              | <a href="#">12347</a> | <a href="#">203</a> | 315.54 | .64    | - | 1.06E-20 | 2.06E-18 |
| <a href="#">nucleic acid binding protein</a>              | <a href="#">858</a>   | <a href="#">9</a>   | 21.93  | .41    | - | 2.60E-03 | 1.45E-02 |
| <a href="#">transporter</a>                               | <a href="#">687</a>   | <a href="#">7</a>   | 17.56  | .40    | - | 8.71E-03 | 4.35E-02 |
| <a href="#">immunoglobulin</a>                            | <a href="#">389</a>   | <a href="#">0</a>   | 9.94   | < 0.01 | - | 9.86E-05 | 8.01E-04 |
| ↳ <a href="#">defense/immunity protein</a>                | <a href="#">600</a>   | <a href="#">3</a>   | 15.33  | .20    | - | 2.89E-04 | 2.09E-03 |
| <a href="#">helix-turn-helix transcription factor</a>     | <a href="#">213</a>   | <a href="#">0</a>   | 5.44   | < 0.01 | - | 7.28E-03 | 3.74E-02 |
| ↳ <a href="#">DNA-binding transcription factor</a>        | <a href="#">970</a>   | <a href="#">1</a>   | 24.79  | .04    | - | 6.29E-10 | 1.36E-08 |
| ↳ <a href="#">gene-specific transcriptional regulator</a> | <a href="#">1054</a>  | <a href="#">2</a>   | 26.94  | .07    | - | 9.66E-10 | 1.88E-08 |
| <a href="#">C2H2 zinc finger transcription factor</a>     | <a href="#">424</a>   | <a href="#">0</a>   | 10.84  | < 0.01 | - | 4.67E-05 | 3.96E-04 |
| ↳ <a href="#">zinc finger transcription factor</a>        | <a href="#">502</a>   | <a href="#">0</a>   | 12.83  | < 0.01 | - | 6.64E-06 | 6.81E-05 |
| <a href="#">G-protein coupled receptor</a>                | <a href="#">568</a>   | <a href="#">0</a>   | 14.52  | < 0.01 | - | 8.46E-07 | 1.10E-05 |
| ↳ <a href="#">transmembrane signal receptor</a>           | <a href="#">712</a>   | <a href="#">4</a>   | 18.20  | .22    | - | 1.29E-04 | 1.01E-03 |

**PANTHER 15.0 released!**

Analysis Summary: Please report in publication [?](#) **BM-MSC secretome from ND mice**

**Analysis Type:** PANTHER Overrepresentation Test (Released 20190711)

---

**Annotation Version and Release Date:** PANTHER version 15 Released 2020-02-14

---

**Analyzed List:** Client Text Box Input (Mus musculus) [Change](#)

---

**Reference List:** Mus musculus (all genes in database) [Change](#)

---

**Annotation Data Set:** PANTHER Protein Class [?](#)

---

**Test Type:**  Fisher's Exact  Binomial

---

**Correction:**  Calculate False Discovery Rate  Use the Bonferroni correction for multiple testing [?](#)  No correction

**Results** [?](#)

|                               | Reference list                     | Client Text Box Input          |
|-------------------------------|------------------------------------|--------------------------------|
| Uniquely Mapped IDs:          | <a href="#">22265</a> out of 22265 | <a href="#">482</a> out of 482 |
| Unmapped IDs:                 | <a href="#">0</a>                  | <a href="#">3</a>              |
| Multiple mapping information: | <a href="#">0</a>                  | <a href="#">9</a>              |

Export [Table](#) [XML with user input ids](#) [JSON with user input ids](#) View: -- Please select a chart to display --

Displaying only results for FDR P < 0.05, [click here to display all results](#)

|                                                               | Mus musculus (REF)  | Client Text Box Input (▼ <a href="#">Hierarchy</a> <b>NEW!</b> <a href="#">?</a> ) |          |                 |     |             |          |
|---------------------------------------------------------------|---------------------|------------------------------------------------------------------------------------|----------|-----------------|-----|-------------|----------|
| PANTHER Protein Class                                         | #                   | #                                                                                  | expected | Fold Enrichment | +/- | raw P value | FDR      |
| <a href="#">Hsp90 family chaperone</a>                        | <a href="#">4</a>   | <a href="#">3</a>                                                                  | .09      | 34.64           | +   | 3.11E-04    | 2.16E-03 |
| ↳ <a href="#">chaperone</a>                                   | <a href="#">74</a>  | <a href="#">11</a>                                                                 | 1.60     | 6.87            | +   | 1.79E-06    | 2.69E-05 |
| <a href="#">chaperonin</a>                                    | <a href="#">13</a>  | <a href="#">6</a>                                                                  | .28      | 21.32           | +   | 1.88E-06    | 2.62E-05 |
| <a href="#">extracellular matrix structural protein</a>       | <a href="#">73</a>  | <a href="#">18</a>                                                                 | 1.58     | 11.39           | +   | 6.15E-13    | 2.00E-11 |
| ↳ <a href="#">extracellular matrix protein</a>                | <a href="#">161</a> | <a href="#">30</a>                                                                 | 3.49     | 8.61            | +   | 9.84E-18    | 1.92E-15 |
| <a href="#">actin and actin related protein</a>               | <a href="#">30</a>  | <a href="#">5</a>                                                                  | .65      | 7.70            | +   | 8.04E-04    | 5.06E-03 |
| ↳ <a href="#">actin or actin-binding cytoskeletal protein</a> | <a href="#">236</a> | <a href="#">34</a>                                                                 | 5.11     | 6.65            | +   | 7.02E-17    | 6.85E-15 |
| ↳ <a href="#">cytoskeletal protein</a>                        | <a href="#">492</a> | <a href="#">39</a>                                                                 | 10.65    | 3.66            | +   | 1.83E-11    | 5.09E-10 |
| <a href="#">protease inhibitor</a>                            | <a href="#">157</a> | <a href="#">26</a>                                                                 | 3.40     | 7.65            | +   | 1.83E-14    | 1.19E-12 |
| ↳ <a href="#">protein-binding activity modulator</a>          | <a href="#">632</a> | <a href="#">31</a>                                                                 | 13.68    | 2.27            | +   | 4.62E-05    | 4.29E-04 |
| <a href="#">non-motor actin binding protein</a>               | <a href="#">93</a>  | <a href="#">15</a>                                                                 | 2.01     | 7.45            | +   | 9.05E-09    | 2.21E-07 |
| <a href="#">actin binding motor protein</a>                   | <a href="#">27</a>  | <a href="#">4</a>                                                                  | .58      | 6.84            | +   | 3.98E-03    | 2.28E-02 |
| <a href="#">calmodulin-related</a>                            | <a href="#">62</a>  | <a href="#">9</a>                                                                  | 1.34     | 6.71            | +   | 1.86E-05    | 1.91E-04 |

|                                                              |                       |                     |        |        |   |          |          |
|--------------------------------------------------------------|-----------------------|---------------------|--------|--------|---|----------|----------|
| ↳ <a href="#">calcium-binding protein</a>                    | <a href="#">79</a>    | <a href="#">13</a>  | 1.71   | 7.60   | + | 7.20E-08 | 1.28E-06 |
| <a href="#">cytokine</a>                                     | <a href="#">77</a>    | <a href="#">8</a>   | 1.67   | 4.80   | + | 4.43E-04 | 2.98E-03 |
| ↳ <a href="#">intercellular signal molecule</a>              | <a href="#">343</a>   | <a href="#">19</a>  | 7.43   | 2.56   | + | 2.91E-04 | 2.27E-03 |
| <a href="#">metalloprotease</a>                              | <a href="#">167</a>   | <a href="#">13</a>  | 3.62   | 3.60   | + | 1.28E-04 | 1.09E-03 |
| ↳ <a href="#">protease</a>                                   | <a href="#">597</a>   | <a href="#">34</a>  | 12.92  | 2.63   | + | 7.40E-07 | 1.20E-05 |
| <a href="#">ribosomal protein</a>                            | <a href="#">159</a>   | <a href="#">12</a>  | 3.44   | 3.49   | + | 3.01E-04 | 2.26E-03 |
| ↳ <a href="#">translational protein</a>                      | <a href="#">288</a>   | <a href="#">17</a>  | 6.23   | 2.73   | + | 3.01E-04 | 2.18E-03 |
| <a href="#">dehydrogenase</a>                                | <a href="#">119</a>   | <a href="#">8</a>   | 2.58   | 3.11   | + | 5.73E-03 | 3.10E-02 |
| ↳ <a href="#">oxidoreductase</a>                             | <a href="#">418</a>   | <a href="#">26</a>  | 9.05   | 2.87   | + | 3.47E-06 | 4.51E-05 |
| ↳ <a href="#">metabolite interconversion enzyme</a>          | <a href="#">1428</a>  | <a href="#">57</a>  | 30.91  | 1.84   | + | 1.43E-05 | 1.55E-04 |
| <a href="#">cysteine protease</a>                            | <a href="#">136</a>   | <a href="#">9</a>   | 2.94   | 3.06   | + | 3.83E-03 | 2.26E-02 |
| <a href="#">serine protease</a>                              | <a href="#">229</a>   | <a href="#">12</a>  | 4.96   | 2.42   | + | 5.55E-03 | 3.09E-02 |
| Unclassified                                                 | <a href="#">12347</a> | <a href="#">184</a> | 267.29 | .69    | - | 5.58E-14 | 2.72E-12 |
| <a href="#">RNA binding protein</a>                          | <a href="#">615</a>   | <a href="#">4</a>   | 13.31  | .30    | - | 6.44E-03 | 3.40E-02 |
| ↳ <a href="#">nucleic acid binding protein</a>               | <a href="#">858</a>   | <a href="#">6</a>   | 18.57  | .32    | - | 1.52E-03 | 9.26E-03 |
| <a href="#">transporter</a>                                  | <a href="#">687</a>   | <a href="#">1</a>   | 14.87  | .07    | - | 1.01E-05 | 1.16E-04 |
| <a href="#">immunoglobulin</a>                               | <a href="#">389</a>   | <a href="#">0</a>   | 8.42   | < 0.01 | - | 4.90E-04 | 3.19E-03 |
| ↳ <a href="#">defense/immunity protein</a>                   | <a href="#">600</a>   | <a href="#">1</a>   | 12.99  | .08    | - | 6.91E-05 | 6.13E-04 |
| <a href="#">C2H2 zinc finger transcription factor</a>        | <a href="#">424</a>   | <a href="#">0</a>   | 9.18   | < 0.01 | - | 2.22E-04 | 1.80E-03 |
| ↳ <a href="#">zinc finger transcription factor</a>           | <a href="#">502</a>   | <a href="#">0</a>   | 10.87  | < 0.01 | - | 2.97E-05 | 2.89E-04 |
| ↳ <a href="#">DNA-binding transcription factor</a>           | <a href="#">970</a>   | <a href="#">1</a>   | 21.00  | .05    | - | 3.28E-08 | 7.10E-07 |
| ↳ <a href="#">gene-specific transcriptional regulator</a>    | <a href="#">1054</a>  | <a href="#">2</a>   | 22.82  | .09    | - | 6.70E-08 | 1.31E-06 |
| <a href="#">G-protein coupled receptor</a>                   | <a href="#">568</a>   | <a href="#">0</a>   | 12.30  | < 0.01 | - | 9.44E-06 | 1.15E-04 |
| <a href="#">non-receptor serine/threonine protein kinase</a> | <a href="#">256</a>   | <a href="#">0</a>   | 5.54   | < 0.01 | - | 7.40E-03 | 3.80E-02 |

[PANTHER 15.0 released!](#)

Analysis Summary: Please report in publication [vWAT-MSC secretome from ND mice](#)

**Analysis Type:** PANTHER Overrepresentation Test (Released 20190711)

---

**Annotation Version and Release Date:** PANTHER version 15 Released 2020-02-14

---

**Analyzed List:** Client Text Box Input (Mus musculus) [Change](#)

---

**Reference List:** Mus musculus (all genes in database) [Change](#)

---

**Annotation Data Set:** PANTHER GO-Slim Molecular Function [?](#)

---

**Test Type:**  Fisher's Exact  Binomial

---

**Correction:**  Calculate False Discovery Rate  Use the Bonferroni correction for multiple testing [?](#)  No correction

Results [?](#)

|                               | Reference list                     | Client Text Box Input          |
|-------------------------------|------------------------------------|--------------------------------|
| Uniquely Mapped IDs:          | <a href="#">22265</a> out of 22265 | <a href="#">361</a> out of 363 |
| Unmapped IDs:                 | <a href="#">0</a>                  | <a href="#">0</a>              |
| Multiple mapping information: | <a href="#">0</a>                  | <a href="#">5</a>              |

Export [Table](#) [XML with user input ids](#) [JSON with user input ids](#) View: -- Please select a chart to display --

Displaying only results for FDR P < 0.05, [click here to display all results](#)

|                                                                         | Mus musculus (REF)   | Client Text Box Input ( <a href="#">Hierarchy</a> <a href="#">NEW!</a> <a href="#">?</a> ) |          |                 |     |             |          |
|-------------------------------------------------------------------------|----------------------|--------------------------------------------------------------------------------------------|----------|-----------------|-----|-------------|----------|
|                                                                         | #                    | #                                                                                          | expected | Fold Enrichment | +/- | raw P value | FDR      |
| <a href="#">PANTHER GO-Slim Molecular Function</a>                      |                      |                                                                                            |          |                 |     |             |          |
| <a href="#">extracellular matrix binding</a>                            | <a href="#">10</a>   | <a href="#">4</a>                                                                          | .16      | 24.53           | +   | 5.74E-05    | 7.26E-04 |
| ↳ <a href="#">binding</a>                                               | <a href="#">4859</a> | <a href="#">128</a>                                                                        | 79.22    | 1.62            | +   | 6.64E-09    | 2.35E-07 |
| <a href="#">actin filament binding</a>                                  | <a href="#">84</a>   | <a href="#">17</a>                                                                         | 1.37     | 12.41           | +   | 5.00E-13    | 4.42E-11 |
| ↳ <a href="#">actin binding</a>                                         | <a href="#">129</a>  | <a href="#">21</a>                                                                         | 2.10     | 9.98            | +   | 3.93E-14    | 4.18E-12 |
| ↳ <a href="#">cytoskeletal protein binding</a>                          | <a href="#">340</a>  | <a href="#">26</a>                                                                         | 5.54     | 4.69            | +   | 2.83E-10    | 1.50E-08 |
| ↳ <a href="#">protein binding</a>                                       | <a href="#">2575</a> | <a href="#">79</a>                                                                         | 41.98    | 1.88            | +   | 5.77E-08    | 1.70E-06 |
| ↳ <a href="#">protein-containing complex binding</a>                    | <a href="#">283</a>  | <a href="#">30</a>                                                                         | 4.61     | 6.50            | +   | 4.77E-15    | 6.33E-13 |
| <a href="#">unfolded protein binding</a>                                | <a href="#">45</a>   | <a href="#">9</a>                                                                          | .73      | 12.27           | +   | 1.79E-07    | 4.76E-06 |
| <a href="#">oxidoreductase activity, acting on peroxide as acceptor</a> | <a href="#">36</a>   | <a href="#">6</a>                                                                          | .59      | 10.22           | +   | 5.27E-05    | 6.82E-04 |
| ↳ <a href="#">oxidoreductase activity</a>                               | <a href="#">443</a>  | <a href="#">24</a>                                                                         | 7.22     | 3.32            | +   | 6.38E-07    | 1.36E-05 |
| ↳ <a href="#">catalytic activity</a>                                    | <a href="#">3715</a> | <a href="#">114</a>                                                                        | 60.57    | 1.88            | +   | 9.08E-12    | 6.89E-10 |
| <a href="#">isomerase activity</a>                                      | <a href="#">85</a>   | <a href="#">14</a>                                                                         | 1.39     | 10.10           | +   | 6.46E-10    | 2.64E-08 |
| <a href="#">ATP binding</a>                                             | <a href="#">32</a>   | <a href="#">5</a>                                                                          | .52      | 9.58            | +   | 2.95E-04    | 3.20E-03 |
| ↳ <a href="#">purine ribonucleotide binding</a>                         | <a href="#">167</a>  | <a href="#">12</a>                                                                         | 2.72     | 4.41            | +   | 3.41E-05    | 4.77E-04 |
| ↳ <a href="#">ribonucleotide binding</a>                                | <a href="#">173</a>  | <a href="#">12</a>                                                                         | 2.82     | 4.25            | +   | 4.71E-05    | 6.25E-04 |
| ↳ <a href="#">nucleotide binding</a>                                    | <a href="#">220</a>  | <a href="#">14</a>                                                                         | 3.59     | 3.90            | +   | 2.76E-05    | 3.96E-04 |
| ↳ <a href="#">nucleoside phosphate binding</a>                          | <a href="#">220</a>  | <a href="#">14</a>                                                                         | 3.59     | 3.90            | +   | 2.76E-05    | 4.07E-04 |
| ↳ <a href="#">heterocyclic compound binding</a>                         | <a href="#">1638</a> | <a href="#">42</a>                                                                         | 26.71    | 1.57            | +   | 4.43E-03    | 3.74E-02 |
| ↳ <a href="#">organic cyclic compound binding</a>                       | <a href="#">1680</a> | <a href="#">43</a>                                                                         | 27.39    | 1.57            | +   | 3.67E-03    | 3.19E-02 |

|                                                                                       |                       |                     |        |        |   |          |          |
|---------------------------------------------------------------------------------------|-----------------------|---------------------|--------|--------|---|----------|----------|
| ↳ <a href="#">small molecule binding</a>                                              | <a href="#">358</a>   | <a href="#">18</a>  | 5.84   | 3.08   | + | 4.15E-05 | 5.65E-04 |
| ↳ <a href="#">carbohydrate derivative binding</a>                                     | <a href="#">242</a>   | <a href="#">17</a>  | 3.95   | 4.31   | + | 1.10E-06 | 2.16E-05 |
| ↳ <a href="#">purine nucleotide binding</a>                                           | <a href="#">179</a>   | <a href="#">12</a>  | 2.92   | 4.11   | + | 6.42E-05 | 7.93E-04 |
| ↳ <a href="#">purine ribonucleoside triphosphate binding</a>                          | <a href="#">142</a>   | <a href="#">8</a>   | 2.32   | 3.46   | + | 2.97E-03 | 2.63E-02 |
| ↳ <a href="#">anion binding</a>                                                       | <a href="#">473</a>   | <a href="#">19</a>  | 7.71   | 2.46   | + | 4.14E-04 | 4.40E-03 |
| ↳ <a href="#">ion binding</a>                                                         | <a href="#">711</a>   | <a href="#">34</a>  | 11.59  | 2.93   | + | 5.06E-08 | 1.68E-06 |
| ↳ <a href="#">drug binding</a>                                                        | <a href="#">117</a>   | <a href="#">11</a>  | 1.91   | 5.77   | + | 7.10E-06 | 1.11E-04 |
| <a href="#">integrin binding</a>                                                      | <a href="#">28</a>    | <a href="#">4</a>   | .46    | 8.76   | + | 1.64E-03 | 1.62E-02 |
| ↳ <a href="#">cell adhesion molecule binding</a>                                      | <a href="#">70</a>    | <a href="#">7</a>   | 1.14   | 6.13   | + | 2.37E-04 | 2.68E-03 |
| <a href="#">structural constituent of ribosome</a>                                    | <a href="#">128</a>   | <a href="#">16</a>  | 2.09   | 7.67   | + | 1.48E-09 | 5.61E-08 |
| ↳ <a href="#">structural molecule activity</a>                                        | <a href="#">218</a>   | <a href="#">22</a>  | 3.55   | 6.19   | + | 5.54E-11 | 3.27E-09 |
| <a href="#">metalloendopeptidase activity</a>                                         | <a href="#">42</a>    | <a href="#">5</a>   | .68    | 7.30   | + | 9.12E-04 | 9.49E-03 |
| ↳ <a href="#">endopeptidase activity</a>                                              | <a href="#">355</a>   | <a href="#">37</a>  | 5.79   | 6.39   | + | 4.36E-18 | 2.31E-15 |
| ↳ <a href="#">peptidase activity, acting on L-amino acid peptides</a>                 | <a href="#">454</a>   | <a href="#">39</a>  | 7.40   | 5.27   | + | 2.20E-16 | 5.84E-14 |
| ↳ <a href="#">peptidase activity</a>                                                  | <a href="#">463</a>   | <a href="#">39</a>  | 7.55   | 5.17   | + | 4.03E-16 | 7.14E-14 |
| ↳ <a href="#">hydrolase activity</a>                                                  | <a href="#">1631</a>  | <a href="#">65</a>  | 26.59  | 2.44   | + | 5.25E-11 | 3.49E-09 |
| ↳ <a href="#">catalytic activity, acting on a protein</a>                             | <a href="#">1447</a>  | <a href="#">53</a>  | 23.59  | 2.25   | + | 5.52E-08 | 1.72E-06 |
| ↳ <a href="#">metallopeptidase activity</a>                                           | <a href="#">75</a>    | <a href="#">6</a>   | 1.22   | 4.91   | + | 1.93E-03 | 1.80E-02 |
| <a href="#">endopeptidase inhibitor activity</a>                                      | <a href="#">108</a>   | <a href="#">12</a>  | 1.76   | 6.82   | + | 5.40E-07 | 1.25E-05 |
| ↳ <a href="#">peptidase inhibitor activity</a>                                        | <a href="#">108</a>   | <a href="#">12</a>  | 1.76   | 6.82   | + | 5.40E-07 | 1.20E-05 |
| ↳ <a href="#">peptidase regulator activity</a>                                        | <a href="#">114</a>   | <a href="#">13</a>  | 1.86   | 6.99   | + | 1.38E-07 | 3.85E-06 |
| ↳ <a href="#">enzyme regulator activity</a>                                           | <a href="#">389</a>   | <a href="#">21</a>  | 6.34   | 3.31   | + | 3.40E-06 | 5.48E-05 |
| ↳ <a href="#">molecular function regulator</a>                                        | <a href="#">728</a>   | <a href="#">26</a>  | 11.87  | 2.19   | + | 2.87E-04 | 3.18E-03 |
| ↳ <a href="#">enzyme inhibitor activity</a>                                           | <a href="#">149</a>   | <a href="#">14</a>  | 2.43   | 5.76   | + | 4.07E-07 | 9.81E-06 |
| <a href="#">protease binding</a>                                                      | <a href="#">119</a>   | <a href="#">13</a>  | 1.94   | 6.70   | + | 2.17E-07 | 5.50E-06 |
| ↳ <a href="#">enzyme binding</a>                                                      | <a href="#">618</a>   | <a href="#">22</a>  | 10.08  | 2.18   | + | 1.04E-03 | 1.05E-02 |
| <a href="#">serine-type endopeptidase activity</a>                                    | <a href="#">148</a>   | <a href="#">12</a>  | 2.41   | 4.97   | + | 1.11E-05 | 1.69E-04 |
| ↳ <a href="#">serine hydrolase activity</a>                                           | <a href="#">152</a>   | <a href="#">13</a>  | 2.48   | 5.25   | + | 2.79E-06 | 4.77E-05 |
| ↳ <a href="#">hydrolase activity, acting on acid phosphorus-nitrogen bonds</a>        | <a href="#">152</a>   | <a href="#">13</a>  | 2.48   | 5.25   | + | 2.79E-06 | 4.63E-05 |
| <a href="#">transition metal ion binding</a>                                          | <a href="#">87</a>    | <a href="#">6</a>   | 1.42   | 4.23   | + | 3.87E-03 | 3.31E-02 |
| ↳ <a href="#">metal ion binding</a>                                                   | <a href="#">219</a>   | <a href="#">16</a>  | 3.57   | 4.48   | + | 1.41E-06 | 2.58E-05 |
| ↳ <a href="#">cation binding</a>                                                      | <a href="#">314</a>   | <a href="#">16</a>  | 5.12   | 3.13   | + | 9.51E-05 | 1.12E-03 |
| <a href="#">calcium ion binding</a>                                                   | <a href="#">119</a>   | <a href="#">8</a>   | 1.94   | 4.12   | + | 1.04E-03 | 1.06E-02 |
| <a href="#">RNA binding</a>                                                           | <a href="#">488</a>   | <a href="#">18</a>  | 7.96   | 2.26   | + | 1.73E-03 | 1.67E-02 |
| Unclassified                                                                          | <a href="#">13264</a> | <a href="#">156</a> | 216.25 | .72    | - | 2.99E-10 | 1.32E-08 |
| <a href="#">transmembrane transporter activity</a>                                    | <a href="#">701</a>   | <a href="#">2</a>   | 11.43  | .17    | - | 1.86E-03 | 1.76E-02 |
| <a href="#">sequence-specific DNA binding</a>                                         | <a href="#">538</a>   | <a href="#">1</a>   | 8.77   | .11    | - | 2.70E-03 | 2.43E-02 |
| <a href="#">G protein-coupled receptor activity</a>                                   | <a href="#">405</a>   | <a href="#">0</a>   | 6.60   | < 0.01 | - | 2.26E-03 | 2.07E-02 |
| ↳ <a href="#">transmembrane signaling receptor activity</a>                           | <a href="#">1182</a>  | <a href="#">2</a>   | 19.27  | .10    | - | 1.17E-06 | 2.22E-05 |
| ↳ <a href="#">signaling receptor activity</a>                                         | <a href="#">1282</a>  | <a href="#">3</a>   | 20.90  | .14    | - | 1.80E-06 | 3.19E-05 |
| ↳ <a href="#">molecular transducer activity</a>                                       | <a href="#">1349</a>  | <a href="#">3</a>   | 21.99  | .14    | - | 8.96E-07 | 1.83E-05 |
| <a href="#">DNA-binding transcription factor activity, RNA polymerase II-specific</a> | <a href="#">366</a>   | <a href="#">0</a>   | 5.97   | < 0.01 | - | 5.08E-03 | 4.22E-02 |
| ↳ <a href="#">DNA-binding transcription factor activity</a>                           | <a href="#">618</a>   | <a href="#">0</a>   | 10.08  | < 0.01 | - | 6.45E-05 | 7.78E-04 |
| ↳ <a href="#">transcription regulator activity</a>                                    | <a href="#">772</a>   | <a href="#">1</a>   | 12.59  | .08    | - | 9.98E-05 | 1.15E-03 |
| <a href="#">protein serine/threonine kinase activity</a>                              | <a href="#">374</a>   | <a href="#">0</a>   | 6.10   | < 0.01 | - | 5.31E-03 | 4.34E-02 |



[PANTHER 15.0 released!](#)

Analysis Summary: Please report in publication [?](#) **sWAT-MSC secretome from ND mice**

**Analysis Type:** PANTHER Overrepresentation Test (Released 20190711)

---

**Annotation Version and Release Date:** PANTHER version 15 Released 2020-02-14

---

**Analyzed List:** Client Text Box Input (Mus musculus) [Change](#)

---

**Reference List:** Mus musculus (all genes in database) [Change](#)

---

**Annotation Data Set:** PANTHER GO-Slim Molecular Function [?](#)

---

**Test Type:**  Fisher's Exact  Binomial

---

**Correction:**  Calculate False Discovery Rate  Use the Bonferroni correction for multiple testing [?](#)  No correction

Results [?](#)

|                               | Reference list                     | Client Text Box Input          |
|-------------------------------|------------------------------------|--------------------------------|
| Uniquely Mapped IDs:          | <a href="#">22265</a> out of 22265 | <a href="#">572</a> out of 569 |
| Unmapped IDs:                 | <a href="#">0</a>                  | <a href="#">1</a>              |
| Multiple mapping information: | <a href="#">0</a>                  | <a href="#">15</a>             |

Export [Table](#) [XML with user input ids](#) [JSON with user input ids](#) View: [-- Please select a chart to display --](#)

Displaying only results for FDR P < 0.05, [click here to display all results](#)

| PANTHER GO-Slim Molecular Function                           | Mus musculus (REF)   |                     | Client Text Box Input ( <a href="#">Hierarchy</a> <a href="#">NEW!</a> <a href="#">?</a> ) |                 |     |             |          |
|--------------------------------------------------------------|----------------------|---------------------|--------------------------------------------------------------------------------------------|-----------------|-----|-------------|----------|
|                                                              | #                    | #                   | expected                                                                                   | Fold Enrichment | +/- | raw P value | FDR      |
| <a href="#">extracellular matrix structural constituent</a>  | <a href="#">11</a>   | <a href="#">5</a>   | .28                                                                                        | 17.79           | +   | 3.28E-05    | 3.79E-04 |
| ↳ <a href="#">structural molecule activity</a>               | <a href="#">218</a>  | <a href="#">34</a>  | 5.57                                                                                       | 6.10            | +   | 1.08E-15    | 1.43E-13 |
| <a href="#">extracellular matrix binding</a>                 | <a href="#">10</a>   | <a href="#">4</a>   | .26                                                                                        | 15.65           | +   | 3.13E-04    | 2.60E-03 |
| ↳ <a href="#">binding</a>                                    | <a href="#">4859</a> | <a href="#">185</a> | 124.18                                                                                     | 1.49            | +   | 6.10E-09    | 1.71E-07 |
| <a href="#">integrin binding</a>                             | <a href="#">28</a>   | <a href="#">10</a>  | .72                                                                                        | 13.98           | +   | 2.15E-08    | 5.72E-07 |
| ↳ <a href="#">cell adhesion molecule binding</a>             | <a href="#">70</a>   | <a href="#">15</a>  | 1.79                                                                                       | 8.39            | +   | 2.66E-09    | 7.86E-08 |
| ↳ <a href="#">protein binding</a>                            | <a href="#">2575</a> | <a href="#">122</a> | 65.81                                                                                      | 1.85            | +   | 4.13E-11    | 1.99E-09 |
| ↳ <a href="#">protein-containing complex binding</a>         | <a href="#">283</a>  | <a href="#">37</a>  | 7.23                                                                                       | 5.12            | +   | 8.74E-15    | 9.28E-13 |
| <a href="#">unfolded protein binding</a>                     | <a href="#">45</a>   | <a href="#">14</a>  | 1.15                                                                                       | 12.17           | +   | 1.44E-10    | 5.89E-09 |
| <a href="#">heparin binding</a>                              | <a href="#">27</a>   | <a href="#">6</a>   | .69                                                                                        | 8.70            | +   | 1.46E-04    | 1.29E-03 |
| ↳ <a href="#">glycosaminoglycan binding</a>                  | <a href="#">42</a>   | <a href="#">7</a>   | 1.07                                                                                       | 6.52            | +   | 1.99E-04    | 1.71E-03 |
| ↳ <a href="#">carbohydrate derivative binding</a>            | <a href="#">242</a>  | <a href="#">27</a>  | 6.18                                                                                       | 4.37            | +   | 9.60E-10    | 3.00E-08 |
| ↳ <a href="#">anion binding</a>                              | <a href="#">473</a>  | <a href="#">31</a>  | 12.09                                                                                      | 2.56            | +   | 6.83E-06    | 9.07E-05 |
| ↳ <a href="#">ion binding</a>                                | <a href="#">711</a>  | <a href="#">53</a>  | 18.17                                                                                      | 2.92            | +   | 2.00E-11    | 1.06E-09 |
| <a href="#">ATP binding</a>                                  | <a href="#">32</a>   | <a href="#">7</a>   | .82                                                                                        | 8.56            | +   | 4.42E-05    | 4.79E-04 |
| ↳ <a href="#">purine ribonucleotide binding</a>              | <a href="#">167</a>  | <a href="#">20</a>  | 4.27                                                                                       | 4.69            | +   | 5.03E-08    | 1.16E-06 |
| ↳ <a href="#">ribonucleotide binding</a>                     | <a href="#">173</a>  | <a href="#">20</a>  | 4.42                                                                                       | 4.52            | +   | 8.53E-08    | 1.81E-06 |
| ↳ <a href="#">nucleotide binding</a>                         | <a href="#">220</a>  | <a href="#">22</a>  | 5.62                                                                                       | 3.91            | +   | 2.00E-07    | 3.66E-06 |
| ↳ <a href="#">nucleoside phosphate binding</a>               | <a href="#">220</a>  | <a href="#">22</a>  | 5.62                                                                                       | 3.91            | +   | 2.00E-07    | 3.79E-06 |
| ↳ <a href="#">small molecule binding</a>                     | <a href="#">358</a>  | <a href="#">24</a>  | 9.15                                                                                       | 2.62            | +   | 3.64E-05    | 4.11E-04 |
| ↳ <a href="#">purine nucleotide binding</a>                  | <a href="#">179</a>  | <a href="#">20</a>  | 4.57                                                                                       | 4.37            | +   | 1.41E-07    | 2.78E-06 |
| ↳ <a href="#">purine ribonucleoside triphosphate binding</a> | <a href="#">142</a>  | <a href="#">16</a>  | 3.63                                                                                       | 4.41            | +   | 2.26E-06    | 3.42E-05 |
| ↳ <a href="#">drug binding</a>                               | <a href="#">117</a>  | <a href="#">13</a>  | 2.99                                                                                       | 4.35            | +   | 2.28E-05    | 2.88E-04 |
| <a href="#">copper ion binding</a>                           | <a href="#">19</a>   | <a href="#">4</a>   | .49                                                                                        | 8.24            | +   | 2.32E-03    | 1.54E-02 |
| ↳ <a href="#">transition metal ion binding</a>               | <a href="#">87</a>   | <a href="#">9</a>   | 2.22                                                                                       | 4.05            | +   | 6.59E-04    | 5.00E-03 |
| ↳ <a href="#">metal ion binding</a>                          |                      |                     |                                                                                            |                 |     |             |          |

|                                                                                                       |                       |                     |        |        |   |          |          |
|-------------------------------------------------------------------------------------------------------|-----------------------|---------------------|--------|--------|---|----------|----------|
|                                                                                                       | <a href="#">219</a>   | <a href="#">20</a>  | 5.60   | 3.57   | + | 2.60E-06 | 3.73E-05 |
| ↳ <a href="#">cation binding</a>                                                                      | <a href="#">314</a>   | <a href="#">22</a>  | 8.02   | 2.74   | + | 4.13E-05 | 4.57E-04 |
| <a href="#">actin filament binding</a>                                                                | <a href="#">84</a>    | <a href="#">17</a>  | 2.15   | 7.92   | + | 5.01E-10 | 1.77E-08 |
| ↳ <a href="#">actin binding</a>                                                                       | <a href="#">129</a>   | <a href="#">23</a>  | 3.30   | 6.98   | + | 4.34E-12 | 2.56E-10 |
| ↳ <a href="#">cytoskeletal protein binding</a>                                                        | <a href="#">340</a>   | <a href="#">29</a>  | 8.69   | 3.34   | + | 5.93E-08 | 1.31E-06 |
| <a href="#">rRNA binding</a>                                                                          | <a href="#">25</a>    | <a href="#">5</a>   | .64    | 7.83   | + | 8.03E-04 | 5.92E-03 |
| <a href="#">heat shock protein binding</a>                                                            | <a href="#">26</a>    | <a href="#">5</a>   | .66    | 7.53   | + | 9.38E-04 | 6.82E-03 |
| <a href="#">isomerase activity</a>                                                                    | <a href="#">85</a>    | <a href="#">15</a>  | 2.17   | 6.91   | + | 2.66E-08 | 6.73E-07 |
| ↳ <a href="#">catalytic activity</a>                                                                  | <a href="#">3715</a>  | <a href="#">163</a> | 94.94  | 1.72   | + | 3.03E-12 | 2.01E-10 |
| <a href="#">carboxypeptidase activity</a>                                                             | <a href="#">30</a>    | <a href="#">5</a>   | .77    | 6.52   | + | 1.65E-03 | 1.12E-02 |
| ↳ <a href="#">peptidase activity, acting on L-amino acid peptides</a>                                 | <a href="#">454</a>   | <a href="#">52</a>  | 11.60  | 4.48   | + | 4.54E-18 | 2.41E-15 |
| ↳ <a href="#">peptidase activity</a>                                                                  | <a href="#">463</a>   | <a href="#">52</a>  | 11.83  | 4.39   | + | 9.71E-18 | 2.58E-15 |
| ↳↳ <a href="#">hydrolase activity</a>                                                                 | <a href="#">1631</a>  | <a href="#">87</a>  | 41.68  | 2.09   | + | 2.65E-10 | 1.00E-08 |
| ↳↳ <a href="#">catalytic activity, acting on a protein</a>                                            | <a href="#">1447</a>  | <a href="#">81</a>  | 36.98  | 2.19   | + | 1.26E-10 | 5.58E-09 |
| <a href="#">structural constituent of ribosome</a>                                                    | <a href="#">128</a>   | <a href="#">20</a>  | 3.27   | 6.11   | + | 8.62E-10 | 2.86E-08 |
| <a href="#">growth factor activity</a>                                                                | <a href="#">26</a>    | <a href="#">4</a>   | .66    | 6.02   | + | 6.25E-03 | 3.91E-02 |
| ↳ <a href="#">receptor ligand activity</a>                                                            | <a href="#">231</a>   | <a href="#">16</a>  | 5.90   | 2.71   | + | 5.04E-04 | 3.93E-03 |
| ↳↳ <a href="#">signaling receptor activator activity</a>                                              | <a href="#">232</a>   | <a href="#">16</a>  | 5.93   | 2.70   | + | 5.26E-04 | 4.05E-03 |
| ↳↳ <a href="#">receptor regulator activity</a>                                                        | <a href="#">255</a>   | <a href="#">18</a>  | 6.52   | 2.76   | + | 1.85E-04 | 1.61E-03 |
| ↳↳↳ <a href="#">molecular function regulator</a>                                                      | <a href="#">728</a>   | <a href="#">42</a>  | 18.60  | 2.26   | + | 2.57E-06 | 3.79E-05 |
| <a href="#">metalloendopeptidase activity</a>                                                         | <a href="#">42</a>    | <a href="#">6</a>   | 1.07   | 5.59   | + | 1.18E-03 | 8.33E-03 |
| ↳ <a href="#">endopeptidase activity</a>                                                              | <a href="#">355</a>   | <a href="#">45</a>  | 9.07   | 4.96   | + | 2.87E-17 | 5.08E-15 |
| ↳↳ <a href="#">metallopeptidase activity</a>                                                          | <a href="#">75</a>    | <a href="#">10</a>  | 1.92   | 5.22   | + | 4.99E-05 | 5.10E-04 |
| <a href="#">endopeptidase inhibitor activity</a>                                                      | <a href="#">108</a>   | <a href="#">12</a>  | 2.76   | 4.35   | + | 4.67E-05 | 4.96E-04 |
| ↳ <a href="#">peptidase inhibitor activity</a>                                                        | <a href="#">108</a>   | <a href="#">12</a>  | 2.76   | 4.35   | + | 4.67E-05 | 4.87E-04 |
| ↳↳ <a href="#">peptidase regulator activity</a>                                                       | <a href="#">114</a>   | <a href="#">12</a>  | 2.91   | 4.12   | + | 7.54E-05 | 7.28E-04 |
| ↳↳↳ <a href="#">enzyme regulator activity</a>                                                         | <a href="#">389</a>   | <a href="#">23</a>  | 9.94   | 2.31   | + | 3.27E-04 | 2.63E-03 |
| ↳↳↳ <a href="#">enzyme inhibitor activity</a>                                                         | <a href="#">149</a>   | <a href="#">14</a>  | 3.81   | 3.68   | + | 6.12E-05 | 6.13E-04 |
| <a href="#">protease binding</a>                                                                      | <a href="#">119</a>   | <a href="#">12</a>  | 3.04   | 3.95   | + | 1.10E-04 | 1.02E-03 |
| <a href="#">translation regulator activity</a>                                                        | <a href="#">63</a>    | <a href="#">6</a>   | 1.61   | 3.73   | + | 7.42E-03 | 4.53E-02 |
| <a href="#">oxidoreductase activity, acting on the CH-OH group of donors, NAD or NADP as acceptor</a> | <a href="#">76</a>    | <a href="#">7</a>   | 1.94   | 3.60   | + | 4.67E-03 | 2.99E-02 |
| ↳ <a href="#">oxidoreductase activity</a>                                                             | <a href="#">443</a>   | <a href="#">28</a>  | 11.32  | 2.47   | + | 2.89E-05 | 3.57E-04 |
| <a href="#">ligase activity</a>                                                                       | <a href="#">88</a>    | <a href="#">8</a>   | 2.25   | 3.56   | + | 2.75E-03 | 1.80E-02 |
| <a href="#">serine-type endopeptidase activity</a>                                                    | <a href="#">148</a>   | <a href="#">13</a>  | 3.78   | 3.44   | + | 2.06E-04 | 1.74E-03 |
| ↳ <a href="#">serine hydrolase activity</a>                                                           | <a href="#">152</a>   | <a href="#">16</a>  | 3.88   | 4.12   | + | 5.03E-06 | 7.02E-05 |
| ↳↳ <a href="#">hydrolase activity, acting on acid phosphorus-nitrogen bonds</a>                       | <a href="#">152</a>   | <a href="#">16</a>  | 3.88   | 4.12   | + | 5.03E-06 | 6.84E-05 |
| <a href="#">GTP binding</a>                                                                           | <a href="#">110</a>   | <a href="#">9</a>   | 2.81   | 3.20   | + | 2.98E-03 | 1.93E-02 |
| <a href="#">cytokine receptor binding</a>                                                             | <a href="#">122</a>   | <a href="#">9</a>   | 3.12   | 2.89   | + | 5.61E-03 | 3.54E-02 |
| Unclassified                                                                                          | <a href="#">13264</a> | <a href="#">255</a> | 338.97 | .75    | - | 2.62E-12 | 2.32E-10 |
| <a href="#">ion transmembrane transporter activity</a>                                                | <a href="#">581</a>   | <a href="#">5</a>   | 14.85  | .34    | - | 6.62E-03 | 4.09E-02 |
| ↳ <a href="#">transmembrane transporter activity</a>                                                  | <a href="#">701</a>   | <a href="#">5</a>   | 17.91  | .28    | - | 7.82E-04 | 5.85E-03 |
| ↳↳ <a href="#">transporter activity</a>                                                               | <a href="#">782</a>   | <a href="#">7</a>   | 19.98  | .35    | - | 1.53E-03 | 1.05E-02 |
| <a href="#">protein serine/threonine kinase activity</a>                                              | <a href="#">374</a>   | <a href="#">1</a>   | 9.56   | .10    | - | 1.29E-03 | 9.01E-03 |
| ↳ <a href="#">protein kinase activity</a>                                                             | <a href="#">451</a>   | <a href="#">2</a>   | 11.53  | .17    | - | 1.89E-03 | 1.27E-02 |
| ↳↳ <a href="#">phosphotransferase activity, alcohol group as acceptor</a>                             | <a href="#">534</a>   | <a href="#">3</a>   | 13.65  | .22    | - | 1.12E-03 | 8.05E-03 |
| <a href="#">G protein-coupled receptor activity</a>                                                   | <a href="#">405</a>   | <a href="#">0</a>   | 10.35  | < 0.01 | - | 6.69E-05 | 6.58E-04 |
| ↳ <a href="#">transmembrane signaling receptor activity</a>                                           | <a href="#">1182</a>  | <a href="#">5</a>   | 30.21  | .17    | - | 2.71E-08 | 6.53E-07 |
| ↳↳ <a href="#">signaling receptor activity</a>                                                        | <a href="#">1282</a>  | <a href="#">9</a>   | 32.76  | .27    | - | 1.30E-06 | 2.10E-05 |
| ↳↳↳ <a href="#">molecular transducer activity</a>                                                     | <a href="#">1349</a>  | <a href="#">9</a>   | 34.47  | .26    | - | 3.49E-07 | 5.98E-06 |
| <a href="#">DNA-binding transcription factor activity, RNA polymerase II-specific</a>                 | <a href="#">366</a>   | <a href="#">0</a>   | 9.35   | < 0.01 | - | 1.43E-04 | 1.31E-03 |
| ↳ <a href="#">DNA-binding transcription factor activity</a>                                           | <a href="#">618</a>   | <a href="#">0</a>   | 15.79  | < 0.01 | - | 2.62E-07 | 4.63E-06 |
| ↳↳ <a href="#">transcription regulator activity</a>                                                   | <a href="#">772</a>   | <a href="#">1</a>   | 19.73  | .05    | - | 1.04E-07 | 2.12E-06 |
| <a href="#">RNA polymerase II regulatory region sequence-specific DNA binding</a>                     | <a href="#">344</a>   | <a href="#">0</a>   | 8.79   | < 0.01 | - | 3.23E-04 | 2.64E-03 |
| ↳ <a href="#">transcription regulatory region sequence-specific DNA binding</a>                       | <a href="#">372</a>   | <a href="#">0</a>   | 9.51   | < 0.01 | - | 1.45E-04 | 1.30E-03 |
| ↳↳ <a href="#">sequence-specific double-stranded DNA binding</a>                                      | <a href="#">395</a>   | <a href="#">0</a>   | 10.09  | < 0.01 | - | 1.05E-04 | 9.92E-04 |

|                                                                   |                     |                   |       |        |   |          |          |
|-------------------------------------------------------------------|---------------------|-------------------|-------|--------|---|----------|----------|
| ↳ <a href="#">sequence-specific DNA binding</a>                   | <a href="#">538</a> | <a href="#">0</a> | 13.75 | < 0.01 | - | 1.87E-06 | 2.92E-05 |
| ↳ <a href="#">DNA binding</a>                                     | <a href="#">803</a> | <a href="#">2</a> | 20.52 | .10    | - | 4.30E-07 | 7.13E-06 |
| ↳ <a href="#">double-stranded DNA binding</a>                     | <a href="#">444</a> | <a href="#">0</a> | 11.35 | < 0.01 | - | 1.99E-05 | 2.58E-04 |
| ↳ <a href="#">transcription regulatory region DNA binding</a>     | <a href="#">428</a> | <a href="#">0</a> | 10.94 | < 0.01 | - | 2.96E-05 | 3.57E-04 |
| ↳ <a href="#">regulatory region nucleic acid binding</a>          | <a href="#">428</a> | <a href="#">0</a> | 10.94 | < 0.01 | - | 2.96E-05 | 3.49E-04 |
| ↳ <a href="#">RNA polymerase II regulatory region DNA binding</a> | <a href="#">349</a> | <a href="#">0</a> | 8.92  | < 0.01 | - | 3.39E-04 | 2.69E-03 |

**PANTHER 15.0 released!**

Analysis Summary: Please report in publication [BM-MSC secretome from ND mice](#)

**Analysis Type:** PANTHER Overrepresentation Test (Released 20190711)

---

**Annotation Version and Release Date:** PANTHER version 15 Released 2020-02-14

---

**Analyzed List:** Client Text Box Input (Mus musculus) Change

---

**Reference List:** Mus musculus (all genes in database) Change

---

**Annotation Data Set:** PANTHER GO-Slim Molecular Function ?

---

**Test Type:**  Fisher's Exact  Binomial

---

**Correction:**  Calculate False Discovery Rate  Use the Bonferroni correction for multiple testing ?  No correction

Results ?

|                               | Reference list                     | Client Text Box Input          |
|-------------------------------|------------------------------------|--------------------------------|
| Uniquely Mapped IDs:          | <a href="#">22265</a> out of 22265 | <a href="#">482</a> out of 482 |
| Unmapped IDs:                 | <a href="#">0</a>                  | <a href="#">3</a>              |
| Multiple mapping information: | <a href="#">0</a>                  | <a href="#">9</a>              |

Export Table XML with user input ids JSON with user input ids View: -- Please select a chart to display --

Displaying only results for FDR P < 0.05, [click here to display all results](#)

| PANTHER GO-Slim Molecular Function                                    | Mus musculus (REF)   |                     | Client Text Box Input <span>▼ Hierarchy NEW!</span> <span>?</span> |                 |     |             |          |
|-----------------------------------------------------------------------|----------------------|---------------------|--------------------------------------------------------------------|-----------------|-----|-------------|----------|
|                                                                       | #                    | #                   | expected                                                           | Fold Enrichment | +/- | raw P value | FDR      |
| <a href="#">extracellular matrix binding</a>                          | <a href="#">10</a>   | <a href="#">5</a>   | .22                                                                | 23.10           | +   | 1.05E-05    | 1.51E-04 |
| ↳ <a href="#">binding</a>                                             | <a href="#">4859</a> | <a href="#">157</a> | 105.19                                                             | 1.49            | +   | 8.08E-08    | 2.68E-06 |
| <a href="#">extracellular matrix structural constituent</a>           | <a href="#">11</a>   | <a href="#">5</a>   | .24                                                                | 21.00           | +   | 1.51E-05    | 1.95E-04 |
| ↳ <a href="#">structural molecule activity</a>                        | <a href="#">218</a>  | <a href="#">24</a>  | 4.72                                                               | 5.09            | +   | 4.31E-10    | 3.82E-08 |
| <a href="#">integrin binding</a>                                      | <a href="#">28</a>   | <a href="#">8</a>   | .61                                                                | 13.20           | +   | 6.89E-07    | 1.52E-05 |
| ↳ <a href="#">cell adhesion molecule binding</a>                      | <a href="#">70</a>   | <a href="#">9</a>   | 1.52                                                               | 5.94            | +   | 4.42E-05    | 5.22E-04 |
| ↳ <a href="#">protein binding</a>                                     | <a href="#">2575</a> | <a href="#">103</a> | 55.74                                                              | 1.85            | +   | 1.28E-09    | 9.72E-08 |
| ↳ <a href="#">protein-containing complex binding</a>                  | <a href="#">283</a>  | <a href="#">32</a>  | 6.13                                                               | 5.22            | +   | 2.60E-13    | 3.45E-11 |
| <a href="#">unfolded protein binding</a>                              | <a href="#">45</a>   | <a href="#">11</a>  | .97                                                                | 11.29           | +   | 2.18E-08    | 8.25E-07 |
| <a href="#">rRNA binding</a>                                          | <a href="#">25</a>   | <a href="#">5</a>   | .54                                                                | 9.24            | +   | 3.85E-04    | 3.65E-03 |
| <a href="#">heparin binding</a>                                       | <a href="#">27</a>   | <a href="#">5</a>   | .58                                                                | 8.55            | +   | 5.25E-04    | 4.89E-03 |
| ↳ <a href="#">glycosaminoglycan binding</a>                           | <a href="#">42</a>   | <a href="#">5</a>   | .91                                                                | 5.50            | +   | 3.08E-03    | 2.13E-02 |
| ↳ <a href="#">carbohydrate derivative binding</a>                     | <a href="#">242</a>  | <a href="#">17</a>  | 5.24                                                               | 3.24            | +   | 4.19E-05    | 5.05E-04 |
| ↳ <a href="#">ion binding</a>                                         | <a href="#">711</a>  | <a href="#">36</a>  | 15.39                                                              | 2.34            | +   | 6.08E-06    | 9.23E-05 |
| <a href="#">metalloendopeptidase activity</a>                         | <a href="#">42</a>   | <a href="#">7</a>   | .91                                                                | 7.70            | +   | 7.31E-05    | 8.43E-04 |
| ↳ <a href="#">endopeptidase activity</a>                              | <a href="#">355</a>  | <a href="#">46</a>  | 7.69                                                               | 5.99            | +   | 8.97E-21    | 4.76E-18 |
| ↳ <a href="#">peptidase activity, acting on L-amino acid peptides</a> | <a href="#">454</a>  | <a href="#">51</a>  | 9.83                                                               | 5.19            | +   | 1.86E-20    | 4.95E-18 |
| ↳ <a href="#">peptidase activity</a>                                  | <a href="#">463</a>  | <a href="#">51</a>  | 10.02                                                              | 5.09            | +   | 4.05E-20    | 7.17E-18 |
| ↳ <a href="#">hydrolase activity</a>                                  | <a href="#">1631</a> | <a href="#">73</a>  | 35.31                                                              | 2.07            | +   | 7.35E-09    | 3.90E-07 |
| ↳ <a href="#">catalytic activity</a>                                  | <a href="#">3715</a> | <a href="#">134</a> | 80.42                                                              | 1.67            | +   | 1.79E-09    | 1.19E-07 |
| ↳ <a href="#">catalytic activity, acting on a protein</a>             | <a href="#">1447</a> | <a href="#">73</a>  | 31.33                                                              | 2.33            | +   | 5.86E-11    | 6.23E-09 |
| ↳ <a href="#">metallopeptidase activity</a>                           | <a href="#">75</a>   | <a href="#">11</a>  | 1.62                                                               | 6.77            | +   | 2.02E-06    | 3.83E-05 |
| <a href="#">actin filament binding</a>                                | <a href="#">84</a>   | <a href="#">14</a>  | 1.82                                                               | 7.70            | +   | 1.96E-08    | 9.46E-07 |
| ↳ <a href="#">actin binding</a>                                       | <a href="#">129</a>  | <a href="#">18</a>  | 2.79                                                               | 6.45            | +   | 2.37E-09    | 1.40E-07 |
| ↳ <a href="#">cytoskeletal protein binding</a>                        | <a href="#">340</a>  | <a href="#">22</a>  | 7.36                                                               | 2.99            | +   | 1.10E-05    | 1.53E-04 |
| <a href="#">isomerase activity</a>                                    | <a href="#">85</a>   | <a href="#">14</a>  | 1.84                                                               | 7.61            | +   | 2.24E-08    | 7.92E-07 |

|                                                                                                       |                       |                     |        |        |   |          |          |
|-------------------------------------------------------------------------------------------------------|-----------------------|---------------------|--------|--------|---|----------|----------|
| ATP binding                                                                                           | <a href="#">32</a>    | <a href="#">5</a>   | .69    | 7.22   | + | 1.04E-03 | 8.51E-03 |
| ↳ <a href="#">purine ribonucleotide binding</a>                                                       | <a href="#">167</a>   | <a href="#">10</a>  | 3.62   | 2.77   | + | 4.62E-03 | 2.95E-02 |
| ↳ <a href="#">ribonucleotide binding</a>                                                              | <a href="#">173</a>   | <a href="#">10</a>  | 3.75   | 2.67   | + | 5.82E-03 | 3.59E-02 |
| ↳ <a href="#">nucleotide binding</a>                                                                  | <a href="#">220</a>   | <a href="#">12</a>  | 4.76   | 2.52   | + | 4.11E-03 | 2.66E-02 |
| ↳ <a href="#">nucleoside phosphate binding</a>                                                        | <a href="#">220</a>   | <a href="#">12</a>  | 4.76   | 2.52   | + | 4.11E-03 | 2.70E-02 |
| ↳ <a href="#">purine nucleotide binding</a>                                                           | <a href="#">179</a>   | <a href="#">10</a>  | 3.88   | 2.58   | + | 7.24E-03 | 4.32E-02 |
| ↳ <a href="#">drug binding</a>                                                                        | <a href="#">117</a>   | <a href="#">10</a>  | 2.53   | 3.95   | + | 3.81E-04 | 3.68E-03 |
| <a href="#">carboxypeptidase activity</a>                                                             | <a href="#">30</a>    | <a href="#">4</a>   | .65    | 6.16   | + | 5.58E-03 | 3.53E-02 |
| <a href="#">growth factor binding</a>                                                                 | <a href="#">38</a>    | <a href="#">5</a>   | .82    | 6.08   | + | 2.07E-03 | 1.51E-02 |
| <a href="#">endopeptidase inhibitor activity</a>                                                      | <a href="#">108</a>   | <a href="#">14</a>  | 2.34   | 5.99   | + | 3.23E-07 | 8.17E-06 |
| ↳ <a href="#">peptidase inhibitor activity</a>                                                        | <a href="#">108</a>   | <a href="#">14</a>  | 2.34   | 5.99   | + | 3.23E-07 | 7.80E-06 |
| ↳ <a href="#">peptidase regulator activity</a>                                                        | <a href="#">114</a>   | <a href="#">15</a>  | 2.47   | 6.08   | + | 1.03E-07 | 3.22E-06 |
| ↳ <a href="#">enzyme regulator activity</a>                                                           | <a href="#">389</a>   | <a href="#">20</a>  | 8.42   | 2.37   | + | 6.50E-04 | 5.95E-03 |
| ↳ <a href="#">molecular function regulator</a>                                                        | <a href="#">728</a>   | <a href="#">35</a>  | 15.76  | 2.22   | + | 2.76E-05 | 3.41E-04 |
| ↳ <a href="#">enzyme inhibitor activity</a>                                                           | <a href="#">149</a>   | <a href="#">15</a>  | 3.23   | 4.65   | + | 2.31E-06 | 3.96E-05 |
| <a href="#">protease binding</a>                                                                      | <a href="#">119</a>   | <a href="#">15</a>  | 2.58   | 5.82   | + | 1.71E-07 | 4.54E-06 |
| ↳ <a href="#">enzyme binding</a>                                                                      | <a href="#">618</a>   | <a href="#">24</a>  | 13.38  | 1.79   | + | 7.53E-03 | 4.44E-02 |
| <a href="#">structural constituent of ribosome</a>                                                    | <a href="#">128</a>   | <a href="#">14</a>  | 2.77   | 5.05   | + | 2.06E-06 | 3.77E-05 |
| <a href="#">serine-type endopeptidase activity</a>                                                    | <a href="#">148</a>   | <a href="#">15</a>  | 3.20   | 4.68   | + | 2.14E-06 | 3.79E-05 |
| ↳ <a href="#">serine hydrolase activity</a>                                                           | <a href="#">152</a>   | <a href="#">17</a>  | 3.29   | 5.17   | + | 1.26E-07 | 3.70E-06 |
| ↳ <a href="#">hydrolase activity, acting on acid phosphorus-nitrogen bonds</a>                        | <a href="#">152</a>   | <a href="#">17</a>  | 3.29   | 5.17   | + | 1.26E-07 | 3.51E-06 |
| <a href="#">oxidoreductase activity, acting on the CH-OH group of donors, NAD or NADP as acceptor</a> | <a href="#">76</a>    | <a href="#">7</a>   | 1.65   | 4.25   | + | 1.91E-03 | 1.43E-02 |
| ↳ <a href="#">oxidoreductase activity</a>                                                             | <a href="#">443</a>   | <a href="#">28</a>  | 9.59   | 2.92   | + | 1.09E-06 | 2.31E-05 |
| <a href="#">cysteine-type endopeptidase activity</a>                                                  | <a href="#">93</a>    | <a href="#">8</a>   | 2.01   | 3.97   | + | 1.39E-03 | 1.07E-02 |
| <a href="#">transition metal ion binding</a>                                                          | <a href="#">87</a>    | <a href="#">7</a>   | 1.88   | 3.72   | + | 3.86E-03 | 2.59E-02 |
| ↳ <a href="#">metal ion binding</a>                                                                   | <a href="#">219</a>   | <a href="#">18</a>  | 4.74   | 3.80   | + | 3.41E-06 | 5.48E-05 |
| ↳ <a href="#">cation binding</a>                                                                      | <a href="#">314</a>   | <a href="#">18</a>  | 6.80   | 2.65   | + | 2.83E-04 | 2.89E-03 |
| <a href="#">cytokine activity</a>                                                                     | <a href="#">116</a>   | <a href="#">9</a>   | 2.51   | 3.58   | + | 1.40E-03 | 1.06E-02 |
| ↳ <a href="#">receptor ligand activity</a>                                                            | <a href="#">231</a>   | <a href="#">14</a>  | 5.00   | 2.80   | + | 7.88E-04 | 6.75E-03 |
| ↳ <a href="#">signaling receptor activator activity</a>                                               | <a href="#">232</a>   | <a href="#">14</a>  | 5.02   | 2.79   | + | 8.20E-04 | 6.91E-03 |
| ↳ <a href="#">receptor regulator activity</a>                                                         | <a href="#">255</a>   | <a href="#">14</a>  | 5.52   | 2.54   | + | 1.91E-03 | 1.41E-02 |
| <a href="#">calcium ion binding</a>                                                                   | <a href="#">119</a>   | <a href="#">8</a>   | 2.58   | 3.11   | + | 5.73E-03 | 3.58E-02 |
| <a href="#">cytokine receptor binding</a>                                                             | <a href="#">122</a>   | <a href="#">8</a>   | 2.64   | 3.03   | + | 6.57E-03 | 3.97E-02 |
| Unclassified                                                                                          | <a href="#">13264</a> | <a href="#">225</a> | 287.14 | .78    | - | 2.08E-08 | 8.49E-07 |
| <a href="#">G protein-coupled receptor activity</a>                                                   | <a href="#">405</a>   | <a href="#">0</a>   | 8.77   | < 0.01 | - | 3.26E-04 | 3.21E-03 |
| ↳ <a href="#">transmembrane signaling receptor activity</a>                                           | <a href="#">1182</a>  | <a href="#">5</a>   | 25.59  | .20    | - | 1.27E-06 | 2.59E-05 |
| ↳ <a href="#">signaling receptor activity</a>                                                         | <a href="#">1282</a>  | <a href="#">7</a>   | 27.75  | .25    | - | 3.61E-06 | 5.65E-05 |
| ↳ <a href="#">molecular transducer activity</a>                                                       | <a href="#">1349</a>  | <a href="#">7</a>   | 29.20  | .24    | - | 1.32E-06 | 2.60E-05 |
| <a href="#">ion channel activity</a>                                                                  | <a href="#">292</a>   | <a href="#">0</a>   | 6.32   | < 0.01 | - | 3.37E-03 | 2.29E-02 |
| ↳ <a href="#">inorganic molecular entity transmembrane transporter activity</a>                       | <a href="#">550</a>   | <a href="#">0</a>   | 11.91  | < 0.01 | - | 1.40E-05 | 1.86E-04 |
| ↳ <a href="#">transmembrane transporter activity</a>                                                  | <a href="#">701</a>   | <a href="#">0</a>   | 15.18  | < 0.01 | - | 3.77E-07 | 8.70E-06 |
| ↳ <a href="#">transporter activity</a>                                                                | <a href="#">782</a>   | <a href="#">2</a>   | 16.93  | .12    | - | 1.19E-05 | 1.62E-04 |
| ↳ <a href="#">ion transmembrane transporter activity</a>                                              | <a href="#">581</a>   | <a href="#">0</a>   | 12.58  | < 0.01 | - | 6.16E-06 | 9.09E-05 |
| ↳ <a href="#">channel activity</a>                                                                    | <a href="#">308</a>   | <a href="#">0</a>   | 6.67   | < 0.01 | - | 2.26E-03 | 1.60E-02 |
| ↳ <a href="#">passive transmembrane transporter activity</a>                                          | <a href="#">308</a>   | <a href="#">0</a>   | 6.67   | < 0.01 | - | 2.26E-03 | 1.62E-02 |
| <a href="#">metal ion transmembrane transporter activity</a>                                          | <a href="#">310</a>   | <a href="#">0</a>   | 6.71   | < 0.01 | - | 2.27E-03 | 1.59E-02 |
| ↳ <a href="#">inorganic cation transmembrane transporter activity</a>                                 | <a href="#">395</a>   | <a href="#">0</a>   | 8.55   | < 0.01 | - | 3.16E-04 | 3.16E-03 |
| ↳ <a href="#">cation transmembrane transporter activity</a>                                           | <a href="#">424</a>   | <a href="#">0</a>   | 9.18   | < 0.01 | - | 2.22E-04 | 2.45E-03 |
| <a href="#">DNA-binding transcription factor activity, RNA polymerase II-specific</a>                 | <a href="#">366</a>   | <a href="#">0</a>   | 7.92   | < 0.01 | - | 7.04E-04 | 6.33E-03 |
| ↳ <a href="#">DNA-binding transcription factor activity</a>                                           | <a href="#">618</a>   | <a href="#">0</a>   | 13.38  | < 0.01 | - | 2.80E-06 | 4.65E-05 |
| ↳ <a href="#">transcription regulator activity</a>                                                    | <a href="#">772</a>   | <a href="#">2</a>   | 16.71  | .12    | - | 1.79E-05 | 2.26E-04 |
| <a href="#">RNA polymerase II regulatory region sequence-specific DNA binding</a>                     | <a href="#">344</a>   | <a href="#">0</a>   | 7.45   | < 0.01 | - | 1.03E-03 | 8.54E-03 |
| ↳ <a href="#">transcription regulatory region sequence-specific DNA binding</a>                       | <a href="#">372</a>   | <a href="#">0</a>   | 8.05   | < 0.01 | - | 7.33E-04 | 6.49E-03 |
| ↳ <a href="#">sequence-specific double-stranded DNA binding</a>                                       | <a href="#">395</a>   | <a href="#">1</a>   | 8.55   | .12    | - | 4.00E-03 | 2.65E-02 |
| ↳ <a href="#">sequence-specific DNA binding</a>                                                       | <a href="#">538</a>   | <a href="#">1</a>   | 11.65  | .09    | - | 2.05E-04 | 2.32E-03 |

|                                                                |                     |                   |       |        |   |          |          |
|----------------------------------------------------------------|---------------------|-------------------|-------|--------|---|----------|----------|
| ↳DNA binding                                                   | <a href="#">803</a> | <a href="#">4</a> | 17.38 | .23    | - | 2.50E-04 | 2.61E-03 |
| ↳double-stranded DNA binding                                   | <a href="#">444</a> | <a href="#">1</a> | 9.61  | .10    | - | 1.30E-03 | 1.03E-02 |
| ↳transcription regulatory region DNA binding                   | <a href="#">428</a> | <a href="#">0</a> | 9.27  | < 0.01 | - | 2.30E-04 | 2.49E-03 |
| ↳regulatory region nucleic acid binding                        | <a href="#">428</a> | <a href="#">0</a> | 9.27  | < 0.01 | - | 2.30E-04 | 2.44E-03 |
| ↳RNA polymerase II regulatory region DNA binding               | <a href="#">349</a> | <a href="#">0</a> | 7.56  | < 0.01 | - | 1.05E-03 | 8.43E-03 |
| monovalent inorganic cation transmembrane transporter activity | <a href="#">261</a> | <a href="#">0</a> | 5.65  | < 0.01 | - | 7.59E-03 | 4.43E-02 |
| protein serine/threonine kinase activity                       | <a href="#">374</a> | <a href="#">0</a> | 8.10  | < 0.01 | - | 7.47E-04 | 6.50E-03 |
| ↳protein kinase activity                                       | <a href="#">451</a> | <a href="#">1</a> | 9.76  | .10    | - | 1.34E-03 | 1.05E-02 |
| ↳phosphotransferase activity, alcohol group as acceptor        | <a href="#">534</a> | <a href="#">3</a> | 11.56 | .26    | - | 5.85E-03 | 3.57E-02 |

**PANTHER 15.0 released!**

Analysis Summary: Please report in publication [?](#) **vWAT-MSC secretome from ND mice**

**Analysis Type:** PANTHER Overrepresentation Test (Released 20190711)

---

**Annotation Version and Release Date:** PANTHER version 15 Released 2020-02-14

---

**Analyzed List:** Client Text Box Input (Mus musculus) [Change](#)

---

**Reference List:** Mus musculus (all genes in database) [Change](#)

---

**Annotation Data Set:** PANTHER GO-Slim Biological Process [?](#)

---

**Test Type:**  Fisher's Exact  Binomial

---

**Correction:**  Calculate False Discovery Rate  Use the Bonferroni correction for multiple testing [?](#)  No correction

Results [?](#)

|                               | Reference list                     | Client Text Box Input          |
|-------------------------------|------------------------------------|--------------------------------|
| Uniquely Mapped IDs:          | <a href="#">22265</a> out of 22265 | <a href="#">361</a> out of 363 |
| Unmapped IDs:                 | <a href="#">0</a>                  | <a href="#">0</a>              |
| Multiple mapping information: | <a href="#">0</a>                  | <a href="#">5</a>              |

Export [Table](#) [XML with user input ids](#) [JSON with user input ids](#) View: -- Please select a chart to display --

Displaying only results for FDR P < 0.05, [click here to display all results](#)

|                                                                          | Mus musculus (REF)   | Client Text Box Input | <a href="#">Hierarchy</a> <b>NEW!</b> <a href="#">?</a> |                 |     |             |          |
|--------------------------------------------------------------------------|----------------------|-----------------------|---------------------------------------------------------|-----------------|-----|-------------|----------|
|                                                                          | #                    | #                     | expected                                                | Fold Enrichment | +/- | raw P value | FDR      |
| <a href="#">PANTHER GO-Slim Biological Process</a>                       |                      |                       |                                                         |                 |     |             |          |
| <a href="#">tissue remodeling</a>                                        | <a href="#">3</a>    | <a href="#">2</a>     | .05                                                     | 40.89           | +   | 2.49E-03    | 3.51E-02 |
| <a href="#">response to reactive oxygen species</a>                      | <a href="#">11</a>   | <a href="#">5</a>     | .18                                                     | 27.88           | +   | 3.90E-06    | 1.55E-04 |
| ↳ <a href="#">response to oxidative stress</a>                           | <a href="#">25</a>   | <a href="#">9</a>     | .41                                                     | 22.08           | +   | 2.35E-09    | 3.46E-07 |
| <a href="#">cellular response to oxidative stress</a>                    | <a href="#">16</a>   | <a href="#">6</a>     | .26                                                     | 23.00           | +   | 9.82E-07    | 5.48E-05 |
| ↳ <a href="#">cellular process</a>                                       | <a href="#">7925</a> | <a href="#">180</a>   | 129.21                                                  | 1.39            | +   | 7.15E-08    | 7.03E-06 |
| ↳ <a href="#">cellular response to stress</a>                            | <a href="#">444</a>  | <a href="#">16</a>    | 7.24                                                    | 2.21            | +   | 3.85E-03    | 4.85E-02 |
| <a href="#">glucose 6-phosphate metabolic process</a>                    | <a href="#">9</a>    | <a href="#">3</a>     | .15                                                     | 20.45           | +   | 8.09E-04    | 1.40E-02 |
| ↳ <a href="#">organophosphate metabolic process</a>                      | <a href="#">312</a>  | <a href="#">15</a>    | 5.09                                                    | 2.95            | +   | 2.84E-04    | 5.86E-03 |
| ↳ <a href="#">cellular metabolic process</a>                             | <a href="#">4357</a> | <a href="#">109</a>   | 71.03                                                   | 1.53            | +   | 2.77E-06    | 1.30E-04 |
| ↳ <a href="#">metabolic process</a>                                      | <a href="#">4857</a> | <a href="#">115</a>   | 79.19                                                   | 1.45            | +   | 1.67E-05    | 5.40E-04 |
| ↳ <a href="#">organic substance metabolic process</a>                    | <a href="#">4680</a> | <a href="#">106</a>   | 76.30                                                   | 1.39            | +   | 2.71E-04    | 5.82E-03 |
| <a href="#">Arp2/3 complex-mediated actin nucleation</a>                 | <a href="#">18</a>   | <a href="#">6</a>     | .29                                                     | 20.45           | +   | 1.72E-06    | 9.13E-05 |
| ↳ <a href="#">positive regulation of actin filament polymerization</a>   | <a href="#">34</a>   | <a href="#">6</a>     | .55                                                     | 10.82           | +   | 3.96E-05    | 1.09E-03 |
| ↳ <a href="#">regulation of actin filament polymerization</a>            | <a href="#">71</a>   | <a href="#">10</a>    | 1.16                                                    | 8.64            | +   | 6.82E-07    | 4.40E-05 |
| ↳ <a href="#">regulation of protein polymerization</a>                   | <a href="#">75</a>   | <a href="#">10</a>    | 1.22                                                    | 8.18            | +   | 1.07E-06    | 5.83E-05 |
| ↳ <a href="#">regulation of protein complex assembly</a>                 | <a href="#">94</a>   | <a href="#">10</a>    | 1.53                                                    | 6.53            | +   | 6.84E-06    | 2.48E-04 |
| ↳ <a href="#">regulation of cellular component organization</a>          | <a href="#">396</a>  | <a href="#">17</a>    | 6.46                                                    | 2.63            | +   | 4.03E-04    | 8.01E-03 |
| ↳ <a href="#">regulation of cellular component biogenesis</a>            | <a href="#">140</a>  | <a href="#">10</a>    | 2.28                                                    | 4.38            | +   | 1.60E-04    | 3.63E-03 |
| ↳ <a href="#">regulation of actin polymerization or depolymerization</a> | <a href="#">73</a>   | <a href="#">11</a>    | 1.19                                                    | 9.24            | +   | 1.02E-07    | 8.74E-06 |
| ↳ <a href="#">regulation of actin filament organization</a>              | <a href="#">81</a>   | <a href="#">11</a>    | 1.32                                                    | 8.33            | +   | 2.62E-07    | 2.00E-05 |
| ↳ <a href="#">regulation of actin cytoskeleton organization</a>          | <a href="#">106</a>  | <a href="#">12</a>    | 1.73                                                    | 6.94            | +   | 4.50E-07    | 3.32E-05 |
| ↳ <a href="#">regulation of actin filament-based process</a>             | <a href="#">107</a>  | <a href="#">12</a>    | 1.74                                                    | 6.88            | +   | 4.93E-07    | 3.39E-05 |
| ↳ <a href="#">regulation of cytoskeleton organization</a>                | <a href="#">146</a>  | <a href="#">12</a>    | 2.38                                                    | 5.04            | +   | 9.79E-06    | 3.37E-04 |

|                                                           |                      |                    |       |       |   |          |          |
|-----------------------------------------------------------|----------------------|--------------------|-------|-------|---|----------|----------|
| ↳regulation of organelle organization                     | <a href="#">264</a>  | <a href="#">15</a> | 4.30  | 3.49  | + | 4.95E-05 | 1.31E-03 |
| ↳regulation of supramolecular fiber organization          | <a href="#">90</a>   | <a href="#">11</a> | 1.47  | 7.50  | + | 6.82E-07 | 4.27E-05 |
| ↳regulation of actin filament length                      | <a href="#">73</a>   | <a href="#">11</a> | 1.19  | 9.24  | + | 1.02E-07 | 9.12E-06 |
| ↳regulation of cellular component size                    | <a href="#">108</a>  | <a href="#">12</a> | 1.76  | 6.82  | + | 5.40E-07 | 3.60E-05 |
| ↳regulation of anatomical structure size                  | <a href="#">120</a>  | <a href="#">13</a> | 1.96  | 6.64  | + | 2.37E-07 | 1.89E-05 |
| ↳regulation of biological quality                         | <a href="#">905</a>  | <a href="#">28</a> | 14.75 | 1.90  | + | 1.87E-03 | 2.80E-02 |
| ↳cellular component organization                          | <a href="#">2396</a> | <a href="#">61</a> | 39.06 | 1.56  | + | 6.14E-04 | 1.12E-02 |
| ↳cellular component organization or biogenesis            | <a href="#">2526</a> | <a href="#">65</a> | 41.18 | 1.58  | + | 2.38E-04 | 5.16E-03 |
| ↳positive regulation of supramolecular fiber organization | <a href="#">48</a>   | <a href="#">8</a>  | .78   | 10.22 | + | 2.95E-06 | 1.32E-04 |
| ↳positive regulation of cellular component organization   | <a href="#">136</a>  | <a href="#">11</a> | 2.22  | 4.96  | + | 2.63E-05 | 7.77E-04 |
| ↳positive regulation of cytoskeleton organization         | <a href="#">49</a>   | <a href="#">8</a>  | .80   | 10.01 | + | 3.38E-06 | 1.42E-04 |
| ↳positive regulation of organelle organization            | <a href="#">79</a>   | <a href="#">9</a>  | 1.29  | 6.99  | + | 1.19E-05 | 4.04E-04 |
| ↳positive regulation of protein polymerization            | <a href="#">38</a>   | <a href="#">6</a>  | .62   | 9.68  | + | 6.90E-05 | 1.72E-03 |
| ↳positive regulation of protein complex assembly          | <a href="#">43</a>   | <a href="#">6</a>  | .70   | 8.56  | + | 1.28E-04 | 3.07E-03 |
| ↳positive regulation of cellular component biogenesis     | <a href="#">64</a>   | <a href="#">7</a>  | 1.04  | 6.71  | + | 1.42E-04 | 3.30E-03 |
| ↳actin filament organization                              | <a href="#">159</a>  | <a href="#">21</a> | 2.59  | 8.10  | + | 1.51E-12 | 6.23E-10 |
| ↳actin cytoskeleton organization                          | <a href="#">238</a>  | <a href="#">23</a> | 3.88  | 5.93  | + | 4.47E-11 | 1.15E-08 |
| ↳cytoskeleton organization                                | <a href="#">560</a>  | <a href="#">29</a> | 9.13  | 3.18  | + | 1.05E-07 | 8.67E-06 |
| ↳actin filament-based process                             | <a href="#">246</a>  | <a href="#">23</a> | 4.01  | 5.73  | + | 8.21E-11 | 1.69E-08 |
| ↳supramolecular fiber organization                        | <a href="#">236</a>  | <a href="#">25</a> | 3.85  | 6.50  | + | 9.82E-13 | 5.07E-10 |
| collagen fibril organization                              | <a href="#">11</a>   | <a href="#">3</a>  | .18   | 16.73 | + | 1.31E-03 | 2.04E-02 |
| ↳extracellular matrix organization                        | <a href="#">56</a>   | <a href="#">7</a>  | .91   | 7.67  | + | 6.60E-05 | 1.68E-03 |
| ↳extracellular structure organization                     | <a href="#">63</a>   | <a href="#">7</a>  | 1.03  | 6.82  | + | 1.30E-04 | 3.05E-03 |
| ↳protein-containing complex subunit organization          | <a href="#">481</a>  | <a href="#">28</a> | 7.84  | 3.57  | + | 1.73E-08 | 2.10E-06 |
| glycolytic process                                        | <a href="#">20</a>   | <a href="#">5</a>  | .33   | 15.33 | + | 4.22E-05 | 1.14E-03 |
| ↳generation of precursor metabolites and energy           | <a href="#">103</a>  | <a href="#">11</a> | 1.68  | 6.55  | + | 2.29E-06 | 1.10E-04 |
| ↳nucleotide phosphorylation                               | <a href="#">20</a>   | <a href="#">5</a>  | .33   | 15.33 | + | 4.22E-05 | 1.13E-03 |
| ↳organic substance catabolic process                      | <a href="#">703</a>  | <a href="#">43</a> | 11.46 | 3.75  | + | 4.16E-13 | 2.86E-10 |
| ↳catabolic process                                        | <a href="#">888</a>  | <a href="#">51</a> | 14.48 | 3.52  | + | 2.26E-14 | 4.66E-11 |
| ↳carbohydrate metabolic process                           | <a href="#">133</a>  | <a href="#">9</a>  | 2.17  | 4.15  | + | 4.90E-04 | 9.54E-03 |
| ↳primary metabolic process                                | <a href="#">4458</a> | <a href="#">99</a> | 72.68 | 1.36  | + | 9.44E-04 | 1.57E-02 |
| ↳carboxylic acid metabolic process                        | <a href="#">331</a>  | <a href="#">14</a> | 5.40  | 2.59  | + | 1.47E-03 | 2.22E-02 |
| ↳oxoacid metabolic process                                | <a href="#">342</a>  | <a href="#">14</a> | 5.58  | 2.51  | + | 1.96E-03 | 2.89E-02 |
| ↳organic acid metabolic process                           | <a href="#">355</a>  | <a href="#">14</a> | 5.79  | 2.42  | + | 2.72E-03 | 3.74E-02 |
| ↳small molecule metabolic process                         | <a href="#">587</a>  | <a href="#">24</a> | 9.57  | 2.51  | + | 5.72E-05 | 1.49E-03 |
| ↳purine ribonucleotide metabolic process                  | <a href="#">130</a>  | <a href="#">9</a>  | 2.12  | 4.25  | + | 4.19E-04 | 8.24E-03 |
| ↳purine nucleotide metabolic process                      | <a href="#">138</a>  | <a href="#">9</a>  | 2.25  | 4.00  | + | 6.30E-04 | 1.13E-02 |
| ↳purine-containing compound metabolic process             | <a href="#">152</a>  | <a href="#">10</a> | 2.48  | 4.04  | + | 2.98E-04 | 6.04E-03 |
| ↳nitrogen compound metabolic process                      | <a href="#">4212</a> | <a href="#">97</a> | 68.67 | 1.41  | + | 3.35E-04 | 6.70E-03 |
| ↳organonitrogen compound metabolic process                | <a href="#">2527</a> | <a href="#">82</a> | 41.20 | 1.99  | + | 2.05E-09 | 3.26E-07 |
| ↳nucleotide metabolic process                             | <a href="#">163</a>  | <a href="#">9</a>  | 2.66  | 3.39  | + | 1.90E-03 | 2.82E-02 |
| ↳nucleoside phosphate metabolic process                   | <a href="#">168</a>  | <a href="#">9</a>  | 2.74  | 3.29  | + | 2.31E-03 | 3.30E-02 |
| ↳nucleobase-containing small molecule metabolic process   | <a href="#">202</a>  | <a href="#">12</a> | 3.29  | 3.64  | + | 1.88E-04 | 4.17E-03 |
| ↳ribonucleotide metabolic process                         | <a href="#">135</a>  | <a href="#">9</a>  | 2.20  | 4.09  | + | 5.43E-04 | 1.01E-02 |
| ↳ribose phosphate metabolic process                       | <a href="#">143</a>  | <a href="#">9</a>  | 2.33  | 3.86  | + | 8.00E-04 | 1.40E-02 |
| ↳ATP metabolic process                                    | <a href="#">56</a>   | <a href="#">7</a>  | .91   | 7.67  | + | 6.60E-05 | 1.66E-03 |
| reactive oxygen species metabolic process                 | <a href="#">40</a>   | <a href="#">7</a>  | .65   | 10.73 | + | 9.34E-06 | 3.27E-04 |
| ribosomal large subunit assembly                          | <a href="#">23</a>   | <a href="#">4</a>  | .37   | 10.67 | + | 8.54E-04 | 1.43E-02 |
| ↳ribonucleoprotein complex assembly                       | <a href="#">110</a>  | <a href="#">8</a>  | 1.79  | 4.46  | + | 6.42E-04 | 1.14E-02 |
| ↳cellular protein-containing complex assembly             | <a href="#">367</a>  | <a href="#">20</a> | 5.98  | 3.34  | + | 5.10E-06 | 1.91E-04 |
| ↳protein-containing complex assembly                      | <a href="#">394</a>  | <a href="#">20</a> | 6.42  | 3.11  | + | 1.37E-05 | 4.57E-04 |



|                                                                   |                      |                    |       |       |   |          |          |
|-------------------------------------------------------------------|----------------------|--------------------|-------|-------|---|----------|----------|
| ↳cellular component assembly                                      | <a href="#">734</a>  | <a href="#">29</a> | 11.97 | 2.42  | + | 2.13E-05 | 6.77E-04 |
| ↳cellular component biogenesis                                    | <a href="#">867</a>  | <a href="#">33</a> | 14.14 | 2.33  | + | 1.55E-05 | 5.07E-04 |
| ↳ribonucleoprotein complex subunit organization                   | <a href="#">115</a>  | <a href="#">8</a>  | 1.87  | 4.27  | + | 8.44E-04 | 1.44E-02 |
| ↳ribonucleoprotein complex biogenesis                             | <a href="#">238</a>  | <a href="#">12</a> | 3.88  | 3.09  | + | 7.63E-04 | 1.35E-02 |
| ↳ribosomal large subunit biogenesis                               | <a href="#">63</a>   | <a href="#">6</a>  | 1.03  | 5.84  | + | 8.38E-04 | 1.44E-02 |
| ↳ribosome biogenesis                                              | <a href="#">176</a>  | <a href="#">11</a> | 2.87  | 3.83  | + | 2.29E-04 | 5.03E-03 |
| response to toxic substance                                       | <a href="#">32</a>   | <a href="#">5</a>  | .52   | 9.58  | + | 2.95E-04 | 6.04E-03 |
| glucose metabolic process                                         | <a href="#">26</a>   | <a href="#">4</a>  | .42   | 9.44  | + | 1.28E-03 | 2.04E-02 |
| ↳hexose metabolic process                                         | <a href="#">36</a>   | <a href="#">4</a>  | .59   | 6.82  | + | 3.78E-03 | 4.78E-02 |
| chaperone-mediated protein folding                                | <a href="#">26</a>   | <a href="#">4</a>  | .42   | 9.44  | + | 1.28E-03 | 2.02E-02 |
| ↳protein folding                                                  | <a href="#">81</a>   | <a href="#">17</a> | 1.32  | 12.87 | + | 2.98E-13 | 3.08E-10 |
| actin filament polymerization                                     | <a href="#">74</a>   | <a href="#">10</a> | 1.21  | 8.29  | + | 9.60E-07 | 5.51E-05 |
| ↳protein polymerization                                           | <a href="#">89</a>   | <a href="#">10</a> | 1.45  | 6.89  | + | 4.38E-06 | 1.67E-04 |
| ↳actin polymerization or depolymerization                         | <a href="#">79</a>   | <a href="#">12</a> | 1.29  | 9.32  | + | 2.45E-08 | 2.66E-06 |
| actin filament bundle assembly                                    | <a href="#">31</a>   | <a href="#">4</a>  | .51   | 7.91  | + | 2.30E-03 | 3.32E-02 |
| ↳actin filament bundle organization                               | <a href="#">33</a>   | <a href="#">4</a>  | .54   | 7.43  | + | 2.83E-03 | 3.85E-02 |
| negative regulation of endopeptidase activity                     | <a href="#">82</a>   | <a href="#">10</a> | 1.34  | 7.48  | + | 2.24E-06 | 1.10E-04 |
| ↳negative regulation of peptidase activity                        | <a href="#">87</a>   | <a href="#">10</a> | 1.42  | 7.05  | + | 3.64E-06 | 1.47E-04 |
| ↳negative regulation of hydrolase activity                        | <a href="#">102</a>  | <a href="#">11</a> | 1.66  | 6.61  | + | 2.10E-06 | 1.08E-04 |
| ↳regulation of hydrolase activity                                 | <a href="#">287</a>  | <a href="#">13</a> | 4.68  | 2.78  | + | 1.20E-03 | 1.91E-02 |
| ↳negative regulation of catalytic activity                        | <a href="#">169</a>  | <a href="#">11</a> | 2.76  | 3.99  | + | 1.64E-04 | 3.69E-03 |
| ↳negative regulation of molecular function                        | <a href="#">196</a>  | <a href="#">11</a> | 3.20  | 3.44  | + | 5.44E-04 | 1.00E-02 |
| ↳regulation of peptidase activity                                 | <a href="#">112</a>  | <a href="#">12</a> | 1.83  | 6.57  | + | 7.71E-07 | 4.68E-05 |
| ↳regulation of proteolysis                                        | <a href="#">155</a>  | <a href="#">13</a> | 2.53  | 5.14  | + | 3.40E-06 | 1.41E-04 |
| ↳negative regulation of proteolysis                               | <a href="#">88</a>   | <a href="#">10</a> | 1.43  | 6.97  | + | 3.99E-06 | 1.56E-04 |
| ↳negative regulation of cellular protein metabolic process        | <a href="#">164</a>  | <a href="#">11</a> | 2.67  | 4.11  | + | 1.28E-04 | 3.04E-03 |
| ↳negative regulation of protein metabolic process                 | <a href="#">168</a>  | <a href="#">12</a> | 2.74  | 4.38  | + | 3.61E-05 | 1.01E-03 |
| ↳regulation of endopeptidase activity                             | <a href="#">107</a>  | <a href="#">12</a> | 1.74  | 6.88  | + | 4.93E-07 | 3.51E-05 |
| carbohydrate biosynthetic process                                 | <a href="#">43</a>   | <a href="#">5</a>  | .70   | 7.13  | + | 1.00E-03 | 1.62E-02 |
| maturation of SSU-rRNA                                            | <a href="#">35</a>   | <a href="#">4</a>  | .57   | 7.01  | + | 3.44E-03 | 4.41E-02 |
| ↳nucleic acid metabolic process                                   | <a href="#">1911</a> | <a href="#">16</a> | 31.16 | .51   | - | 3.14E-03 | 4.24E-02 |
| ↳ribosomal small subunit biogenesis                               | <a href="#">51</a>   | <a href="#">5</a>  | .83   | 6.01  | + | 2.02E-03 | 2.93E-02 |
| developmental growth                                              | <a href="#">51</a>   | <a href="#">5</a>  | .83   | 6.01  | + | 2.02E-03 | 2.96E-02 |
| ↳growth                                                           | <a href="#">55</a>   | <a href="#">5</a>  | .90   | 5.58  | + | 2.74E-03 | 3.75E-02 |
| response to inorganic substance                                   | <a href="#">54</a>   | <a href="#">5</a>  | .88   | 5.68  | + | 2.55E-03 | 3.57E-02 |
| response to endoplasmic reticulum stress                          | <a href="#">65</a>   | <a href="#">6</a>  | 1.06  | 5.66  | + | 9.74E-04 | 1.61E-02 |
| proteasome-mediated ubiquitin-dependent protein catabolic process | <a href="#">194</a>  | <a href="#">17</a> | 3.16  | 5.37  | + | 5.96E-08 | 6.15E-06 |
| ↳proteasomal protein catabolic process                            | <a href="#">205</a>  | <a href="#">18</a> | 3.34  | 5.39  | + | 2.36E-08 | 2.70E-06 |
| ↳proteolysis involved in cellular protein catabolic process       | <a href="#">331</a>  | <a href="#">24</a> | 5.40  | 4.45  | + | 3.73E-09 | 5.13E-07 |
| ↳proteolysis                                                      | <a href="#">693</a>  | <a href="#">39</a> | 11.30 | 3.45  | + | 5.91E-11 | 1.35E-08 |
| ↳protein metabolic process                                        | <a href="#">2115</a> | <a href="#">62</a> | 34.48 | 1.80  | + | 8.60E-06 | 3.06E-04 |
| ↳cellular protein catabolic process                               | <a href="#">333</a>  | <a href="#">24</a> | 5.43  | 4.42  | + | 4.16E-09 | 5.37E-07 |
| ↳cellular macromolecule catabolic process                         | <a href="#">429</a>  | <a href="#">25</a> | 6.99  | 3.57  | + | 1.01E-07 | 9.50E-06 |
| ↳macromolecule catabolic process                                  | <a href="#">463</a>  | <a href="#">29</a> | 7.55  | 3.84  | + | 2.03E-09 | 3.49E-07 |
| ↳cellular catabolic process                                       | <a href="#">765</a>  | <a href="#">42</a> | 12.47 | 3.37  | + | 2.13E-11 | 6.29E-09 |
| ↳protein catabolic process                                        | <a href="#">355</a>  | <a href="#">27</a> | 5.79  | 4.66  | + | 1.42E-10 | 2.67E-08 |
| ↳organonitrogen compound catabolic process                        | <a href="#">457</a>  | <a href="#">32</a> | 7.45  | 4.29  | + | 1.98E-11 | 6.81E-09 |
| ↳cellular protein metabolic process                               | <a href="#">1711</a> | <a href="#">56</a> | 27.90 | 2.01  | + | 9.03E-07 | 5.32E-05 |
| ↳ubiquitin-dependent protein catabolic process                    | <a href="#">276</a>  | <a href="#">17</a> | 4.50  | 3.78  | + | 5.82E-06 | 2.14E-04 |
| ↳modification-dependent protein catabolic process                 | <a href="#">285</a>  | <a href="#">18</a> | 4.65  | 3.87  | + | 2.22E-06 | 1.12E-04 |
| ↳modification-dependent macromolecule catabolic process           | <a href="#">290</a>  | <a href="#">18</a> | 4.73  | 3.81  | + | 2.80E-06 | 1.28E-04 |

|                                                                                  |                       |                     |        |        |   |          |          |
|----------------------------------------------------------------------------------|-----------------------|---------------------|--------|--------|---|----------|----------|
| <a href="#">negative regulation of cellular component organization</a>           | <a href="#">88</a>    | <a href="#">7</a>   | 1.43   | 4.88   | + | 8.51E-04 | 1.44E-02 |
| <a href="#">regulation of cell migration</a>                                     | <a href="#">79</a>    | <a href="#">6</a>   | 1.29   | 4.66   | + | 2.47E-03 | 3.51E-02 |
| ↳ <a href="#">regulation of cell motility</a>                                    | <a href="#">86</a>    | <a href="#">6</a>   | 1.40   | 4.28   | + | 3.67E-03 | 4.67E-02 |
| <a href="#">drug metabolic process</a>                                           | <a href="#">189</a>   | <a href="#">13</a>  | 3.08   | 4.22   | + | 2.49E-05 | 7.56E-04 |
| <a href="#">translational elongation</a>                                         | <a href="#">216</a>   | <a href="#">14</a>  | 3.52   | 3.98   | + | 2.28E-05 | 7.12E-04 |
| ↳ <a href="#">translation</a>                                                    | <a href="#">216</a>   | <a href="#">14</a>  | 3.52   | 3.98   | + | 2.28E-05 | 7.02E-04 |
| ↳ <a href="#">peptide biosynthetic process</a>                                   | <a href="#">219</a>   | <a href="#">14</a>  | 3.57   | 3.92   | + | 2.63E-05 | 7.87E-04 |
| ↳ <a href="#">organonitrogen compound biosynthetic process</a>                   | <a href="#">589</a>   | <a href="#">24</a>  | 9.60   | 2.50   | + | 6.01E-05 | 1.55E-03 |
| ↳ <a href="#">amide biosynthetic process</a>                                     | <a href="#">252</a>   | <a href="#">14</a>  | 4.11   | 3.41   | + | 1.10E-04 | 2.67E-03 |
| ↳ <a href="#">cellular amide metabolic process</a>                               | <a href="#">369</a>   | <a href="#">16</a>  | 6.02   | 2.66   | + | 5.35E-04 | 1.00E-02 |
| ↳ <a href="#">peptide metabolic process</a>                                      | <a href="#">286</a>   | <a href="#">16</a>  | 4.66   | 3.43   | + | 3.33E-05 | 9.41E-04 |
| <a href="#">small molecule catabolic process</a>                                 | <a href="#">108</a>   | <a href="#">7</a>   | 1.76   | 3.98   | + | 2.57E-03 | 3.56E-02 |
| <a href="#">oxidation-reduction process</a>                                      | <a href="#">220</a>   | <a href="#">14</a>  | 3.59   | 3.90   | + | 2.76E-05 | 8.01E-04 |
| <a href="#">cofactor metabolic process</a>                                       | <a href="#">168</a>   | <a href="#">10</a>  | 2.74   | 3.65   | + | 6.27E-04 | 1.14E-02 |
| <a href="#">small molecule biosynthetic process</a>                              | <a href="#">155</a>   | <a href="#">9</a>   | 2.53   | 3.56   | + | 1.37E-03 | 2.12E-02 |
| <a href="#">cell migration</a>                                                   | <a href="#">255</a>   | <a href="#">11</a>  | 4.16   | 2.65   | + | 3.97E-03 | 4.97E-02 |
| ↳ <a href="#">cell motility</a>                                                  | <a href="#">285</a>   | <a href="#">12</a>  | 4.65   | 2.58   | + | 3.24E-03 | 4.31E-02 |
| ↳ <a href="#">localization of cell</a>                                           | <a href="#">285</a>   | <a href="#">12</a>  | 4.65   | 2.58   | + | 3.24E-03 | 4.34E-02 |
| Unclassified                                                                     | <a href="#">12808</a> | <a href="#">164</a> | 208.82 | .79    | - | 2.97E-06 | 1.31E-04 |
| <a href="#">macromolecule modification</a>                                       | <a href="#">1237</a>  | <a href="#">8</a>   | 20.17  | .40    | - | 3.41E-03 | 4.43E-02 |
| <a href="#">regulation of transcription by RNA polymerase II</a>                 | <a href="#">745</a>   | <a href="#">1</a>   | 12.15  | .08    | - | 1.43E-04 | 3.29E-03 |
| ↳ <a href="#">regulation of transcription, DNA-templated</a>                     | <a href="#">1117</a>  | <a href="#">5</a>   | 18.21  | .27    | - | 5.34E-04 | 1.03E-02 |
| ↳ <a href="#">regulation of gene expression</a>                                  | <a href="#">1368</a>  | <a href="#">9</a>   | 22.30  | .40    | - | 1.83E-03 | 2.76E-02 |
| ↳ <a href="#">regulation of nucleic acid-templated transcription</a>             | <a href="#">1117</a>  | <a href="#">5</a>   | 18.21  | .27    | - | 5.34E-04 | 1.02E-02 |
| ↳ <a href="#">regulation of RNA biosynthetic process</a>                         | <a href="#">1117</a>  | <a href="#">5</a>   | 18.21  | .27    | - | 5.34E-04 | 1.01E-02 |
| ↳ <a href="#">regulation of RNA metabolic process</a>                            | <a href="#">1222</a>  | <a href="#">8</a>   | 19.92  | .40    | - | 3.37E-03 | 4.42E-02 |
| ↳ <a href="#">regulation of nucleobase-containing compound metabolic process</a> | <a href="#">1263</a>  | <a href="#">8</a>   | 20.59  | .39    | - | 2.56E-03 | 3.57E-02 |
| ↳ <a href="#">regulation of cellular biosynthetic process</a>                    | <a href="#">1234</a>  | <a href="#">8</a>   | 20.12  | .40    | - | 3.39E-03 | 4.43E-02 |
| ↳ <a href="#">regulation of biosynthetic process</a>                             | <a href="#">1240</a>  | <a href="#">8</a>   | 20.22  | .40    | - | 3.43E-03 | 4.43E-02 |
| ↳ <a href="#">regulation of macromolecule biosynthetic process</a>               | <a href="#">1223</a>  | <a href="#">7</a>   | 19.94  | .35    | - | 1.45E-03 | 2.21E-02 |
| ↳ <a href="#">regulation of cellular macromolecule biosynthetic process</a>      | <a href="#">1216</a>  | <a href="#">7</a>   | 19.83  | .35    | - | 1.43E-03 | 2.20E-02 |
| <a href="#">transcription by RNA polymerase II</a>                               | <a href="#">772</a>   | <a href="#">1</a>   | 12.59  | .08    | - | 9.98E-05 | 2.45E-03 |
| ↳ <a href="#">transcription, DNA-templated</a>                                   | <a href="#">1159</a>  | <a href="#">5</a>   | 18.90  | .26    | - | 2.71E-04 | 5.71E-03 |
| ↳ <a href="#">nucleic acid-templated transcription</a>                           | <a href="#">1159</a>  | <a href="#">5</a>   | 18.90  | .26    | - | 2.71E-04 | 5.77E-03 |
| ↳ <a href="#">RNA biosynthetic process</a>                                       | <a href="#">1166</a>  | <a href="#">5</a>   | 19.01  | .26    | - | 2.76E-04 | 5.75E-03 |
| <a href="#">G protein-coupled receptor signaling pathway</a>                     | <a href="#">682</a>   | <a href="#">0</a>   | 11.12  | < 0.01 | - | 3.08E-05 | 8.83E-04 |
| ↳ <a href="#">signal transduction</a>                                            | <a href="#">2229</a>  | <a href="#">20</a>  | 36.34  | .55    | - | 3.35E-03 | 4.43E-02 |
| ↳ <a href="#">signaling</a>                                                      | <a href="#">2365</a>  | <a href="#">20</a>  | 38.56  | .52    | - | 9.91E-04 | 1.62E-02 |
| ↳ <a href="#">cell communication</a>                                             | <a href="#">2367</a>  | <a href="#">20</a>  | 38.59  | .52    | - | 9.92E-04 | 1.61E-02 |

**PANTHER 15.0 released!**

Analysis Summary: Please report in publication [s](#)SWAT-MSC secretome from ND mice

**Analysis Type:** PANTHER Overrepresentation Test (Released 20190711)

---

**Annotation Version and Release Date:** PANTHER version 15 Released 2020-02-14

---

**Analyzed List:** Client Text Box Input (Mus musculus) Change

---

**Reference List:** Mus musculus (all genes in database) Change

---

**Annotation Data Set:** PANTHER GO-Slim Biological Process ?

---

**Test Type:**  Fisher's Exact  Binomial

---

**Correction:**  Calculate False Discovery Rate  Use the Bonferroni correction for multiple testing ?  No correction

Results ?

|                               | Reference list                     | Client Text Box Input          |
|-------------------------------|------------------------------------|--------------------------------|
| Uniquely Mapped IDs:          | <a href="#">22265</a> out of 22265 | <a href="#">572</a> out of 569 |
| Unmapped IDs:                 | <a href="#">0</a>                  | <a href="#">1</a>              |
| Multiple mapping information: | <a href="#">0</a>                  | <a href="#">15</a>             |

Export Table XML with user input ids JSON with user input ids View: -- Please select a chart to display --

Displaying only results for FDR P < 0.05, [click here to display all results](#)

|                                                                 | Mus musculus (REF)   | Client Text Box Input ( <a href="#">Hierarchy</a> <a href="#">NEW!</a> <span>?</span> ) |          |                 |     |             |          |
|-----------------------------------------------------------------|----------------------|-----------------------------------------------------------------------------------------|----------|-----------------|-----|-------------|----------|
|                                                                 | #                    | #                                                                                       | expected | Fold Enrichment | +/- | raw P value | FDR      |
| <a href="#">PANTHER GO-Slim Biological Process</a>              |                      |                                                                                         |          |                 |     |             |          |
| <a href="#">tissue remodeling</a>                               | <a href="#">3</a>    | <a href="#">2</a>                                                                       | .08      | 26.09           | +   | 5.90E-03    | 4.93E-02 |
| <a href="#">positive chemotaxis</a>                             | <a href="#">7</a>    | <a href="#">4</a>                                                                       | .18      | 22.36           | +   | 1.10E-04    | 2.26E-03 |
| ↳ <a href="#">chemotaxis</a>                                    | <a href="#">186</a>  | <a href="#">14</a>                                                                      | 4.75     | 2.95            | +   | 5.18E-04    | 7.28E-03 |
| ↳ <a href="#">response to chemical</a>                          | <a href="#">915</a>  | <a href="#">42</a>                                                                      | 23.38    | 1.80            | +   | 4.12E-04    | 6.20E-03 |
| ↳ <a href="#">taxis</a>                                         | <a href="#">186</a>  | <a href="#">14</a>                                                                      | 4.75     | 2.95            | +   | 5.18E-04    | 7.33E-03 |
| ↳ <a href="#">locomotion</a>                                    | <a href="#">356</a>  | <a href="#">32</a>                                                                      | 9.10     | 3.52            | +   | 3.82E-09    | 3.58E-07 |
| <a href="#">sprouting angiogenesis</a>                          | <a href="#">7</a>    | <a href="#">4</a>                                                                       | .18      | 22.36           | +   | 1.10E-04    | 2.24E-03 |
| ↳ <a href="#">angiogenesis</a>                                  | <a href="#">38</a>   | <a href="#">6</a>                                                                       | .97      | 6.18            | +   | 7.36E-04    | 9.38E-03 |
| ↳ <a href="#">anatomical structure morphogenesis</a>            | <a href="#">450</a>  | <a href="#">29</a>                                                                      | 11.50    | 2.52            | +   | 1.66E-05    | 4.44E-04 |
| ↳ <a href="#">anatomical structure development</a>              | <a href="#">1076</a> | <a href="#">44</a>                                                                      | 27.50    | 1.60            | +   | 3.00E-03    | 2.81E-02 |
| ↳ <a href="#">blood vessel morphogenesis</a>                    | <a href="#">39</a>   | <a href="#">6</a>                                                                       | 1.00     | 6.02            | +   | 8.32E-04    | 1.05E-02 |
| ↳ <a href="#">tube morphogenesis</a>                            | <a href="#">54</a>   | <a href="#">7</a>                                                                       | 1.38     | 5.07            | +   | 7.83E-04    | 9.91E-03 |
| ↳ <a href="#">tube development</a>                              | <a href="#">57</a>   | <a href="#">7</a>                                                                       | 1.46     | 4.81            | +   | 1.05E-03    | 1.24E-02 |
| ↳ <a href="#">multicellular organism development</a>            | <a href="#">828</a>  | <a href="#">39</a>                                                                      | 21.16    | 1.84            | +   | 4.87E-04    | 6.98E-03 |
| ↳ <a href="#">blood vessel development</a>                      | <a href="#">42</a>   | <a href="#">6</a>                                                                       | 1.07     | 5.59            | +   | 1.18E-03    | 1.38E-02 |
| ↳ <a href="#">vasculature development</a>                       | <a href="#">45</a>   | <a href="#">6</a>                                                                       | 1.15     | 5.22            | +   | 1.62E-03    | 1.83E-02 |
| ↳ <a href="#">system development</a>                            | <a href="#">737</a>  | <a href="#">35</a>                                                                      | 18.83    | 1.86            | +   | 8.58E-04    | 1.07E-02 |
| ↳ <a href="#">cardiovascular system development</a>             | <a href="#">46</a>   | <a href="#">6</a>                                                                       | 1.18     | 5.10            | +   | 1.80E-03    | 1.97E-02 |
| ↳ <a href="#">circulatory system development</a>                | <a href="#">92</a>   | <a href="#">9</a>                                                                       | 2.35     | 3.83            | +   | 9.51E-04    | 1.15E-02 |
| <a href="#">collagen fibril organization</a>                    | <a href="#">11</a>   | <a href="#">5</a>                                                                       | .28      | 17.79           | +   | 3.28E-05    | 8.27E-04 |
| ↳ <a href="#">supramolecular fiber organization</a>             | <a href="#">236</a>  | <a href="#">28</a>                                                                      | 6.03     | 4.64            | +   | 1.30E-10    | 3.36E-08 |
| ↳ <a href="#">cellular component organization</a>               | <a href="#">2396</a> | <a href="#">92</a>                                                                      | 61.23    | 1.50            | +   | 1.25E-04    | 2.49E-03 |
| ↳ <a href="#">cellular process</a>                              | <a href="#">7925</a> | <a href="#">276</a>                                                                     | 202.53   | 1.36            | +   | 4.83E-10    | 7.67E-08 |
| ↳ <a href="#">cellular component organization or biogenesis</a> | <a href="#">2526</a> | <a href="#">96</a>                                                                      | 64.55    | 1.49            | +   | 1.05E-04    | 2.19E-03 |
| ↳ <a href="#">extracellular matrix organization</a>             | <a href="#">56</a>   | <a href="#">15</a>                                                                      | 1.43     | 10.48           | +   | 1.87E-10    | 4.28E-08 |

|                                                      |      |     |        |       |   |          |          |
|------------------------------------------------------|------|-----|--------|-------|---|----------|----------|
| ↳extracellular structure organization                | 63   | 15  | 1.61   | 9.32  | + | 7.60E-10 | 9.80E-08 |
| ↳protein-containing complex subunit organization     | 481  | 33  | 12.29  | 2.68  | + | 8.15E-07 | 3.66E-05 |
| IMP metabolic process                                | 7    | 3   | .18    | 16.77 | + | 1.62E-03 | 1.84E-02 |
| ↳small molecule metabolic process                    | 587  | 29  | 15.00  | 1.93  | + | 1.39E-03 | 1.60E-02 |
| ↳metabolic process                                   | 4857 | 164 | 124.12 | 1.32  | + | 1.16E-04 | 2.32E-03 |
| ↳nucleobase-containing compound metabolic process    | 2112 | 32  | 53.97  | .59   | - | 1.30E-03 | 1.52E-02 |
| ↳heterocycle metabolic process                       | 2151 | 34  | 54.97  | .62   | - | 2.36E-03 | 2.37E-02 |
| ↳cellular metabolic process                          | 4357 | 149 | 111.35 | 1.34  | + | 1.47E-04 | 2.79E-03 |
| ↳organic cyclic compound metabolic process           | 2218 | 35  | 56.68  | .62   | - | 1.70E-03 | 1.89E-02 |
| ↳organic substance metabolic process                 | 4680 | 155 | 119.60 | 1.30  | + | 4.87E-04 | 6.93E-03 |
| ↳nitrogen compound metabolic process                 | 4212 | 144 | 107.64 | 1.34  | + | 2.29E-04 | 3.87E-03 |
| ↳cellular aromatic compound metabolic process        | 2163 | 35  | 55.28  | .63   | - | 3.13E-03 | 2.91E-02 |
| ↳organonitrogen compound metabolic process           | 2527 | 132 | 64.58  | 2.04  | + | 4.81E-15 | 9.92E-12 |
| response to hypoxia                                  | 12   | 5   | .31    | 16.30 | + | 4.56E-05 | 1.06E-03 |
| ↳response to abiotic stimulus                        | 86   | 8   | 2.20   | 3.64  | + | 2.41E-03 | 2.41E-02 |
| positive regulation of epithelial cell proliferation | 8    | 3   | .20    | 14.67 | + | 2.19E-03 | 2.28E-02 |
| positive regulation of leukocyte chemotaxis          | 8    | 3   | .20    | 14.67 | + | 2.19E-03 | 2.27E-02 |
| ↳positive regulation of leukocyte migration          | 11   | 3   | .28    | 10.67 | + | 4.56E-03 | 4.01E-02 |
| ↳regulation of leukocyte migration                   | 17   | 5   | .43    | 11.51 | + | 1.75E-04 | 3.17E-03 |
| ↳regulation of cell migration                        | 79   | 9   | 2.02   | 4.46  | + | 3.46E-04 | 5.41E-03 |
| ↳regulation of cell motility                         | 86   | 9   | 2.20   | 4.10  | + | 6.10E-04 | 8.13E-03 |
| ↳regulation of locomotion                            | 91   | 9   | 2.33   | 3.87  | + | 8.86E-04 | 1.09E-02 |
| ↳regulation of cellular component movement           | 93   | 9   | 2.38   | 3.79  | + | 1.02E-03 | 1.22E-02 |
| ↳positive regulation of cell migration               | 43   | 6   | 1.10   | 5.46  | + | 1.31E-03 | 1.52E-02 |
| ↳positive regulation of cell motility                | 47   | 6   | 1.20   | 5.00  | + | 1.98E-03 | 2.13E-02 |
| ↳positive regulation of cellular component movement  | 48   | 6   | 1.23   | 4.89  | + | 2.18E-03 | 2.30E-02 |
| ↳positive regulation of locomotion                   | 48   | 6   | 1.23   | 4.89  | + | 2.18E-03 | 2.29E-02 |
| ↳positive regulation of chemotaxis                   | 9    | 3   | .23    | 13.04 | + | 2.86E-03 | 2.70E-02 |
| positive regulation of angiogenesis                  | 11   | 4   | .28    | 14.23 | + | 4.18E-04 | 6.26E-03 |
| ↳regulation of developmental process                 | 265  | 15  | 6.77   | 2.21  | + | 5.51E-03 | 4.68E-02 |
| ↳positive regulation of developmental process        | 109  | 9   | 2.79   | 3.23  | + | 2.81E-03 | 2.70E-02 |
| ↳regulation of multicellular organismal development  | 198  | 13  | 5.06   | 2.57  | + | 2.55E-03 | 2.50E-02 |
| actin filament depolymerization                      | 11   | 4   | .28    | 14.23 | + | 4.18E-04 | 6.21E-03 |
| ↳actin polymerization or depolymerization            | 79   | 13  | 2.02   | 6.44  | + | 4.60E-07 | 2.21E-05 |
| ↳actin filament organization                         | 159  | 20  | 4.06   | 4.92  | + | 2.40E-08 | 1.84E-06 |
| ↳actin cytoskeleton organization                     | 238  | 24  | 6.08   | 3.95  | + | 4.84E-08 | 3.22E-06 |
| ↳cytoskeleton organization                           | 560  | 38  | 14.31  | 2.66  | + | 1.54E-07 | 7.94E-06 |
| ↳actin filament-based process                        | 246  | 25  | 6.29   | 3.98  | + | 2.21E-08 | 1.76E-06 |
| response to reactive oxygen species                  | 11   | 4   | .28    | 14.23 | + | 4.18E-04 | 6.17E-03 |
| ↳response to oxidative stress                        | 25   | 7   | .64    | 10.96 | + | 1.13E-05 | 3.14E-04 |
| bone morphogenesis                                   | 14   | 5   | .36    | 13.98 | + | 8.22E-05 | 1.77E-03 |
| ↳bone development                                    | 21   | 5   | .54    | 9.32  | + | 4.02E-04 | 6.15E-03 |
| ↳animal organ development                            | 349  | 19  | 8.92   | 2.13  | + | 3.29E-03 | 3.05E-02 |
| ↳animal organ morphogenesis                          | 104  | 10  | 2.66   | 3.76  | + | 5.71E-04 | 7.91E-03 |
| glucose 6-phosphate metabolic process                | 9    | 3   | .23    | 13.04 | + | 2.86E-03 | 2.71E-02 |
| cellular response to oxidative stress                | 16   | 5   | .41    | 12.23 | + | 1.38E-04 | 2.69E-03 |
| ↳cellular response to chemical stimulus              | 641  | 33  | 16.38  | 2.01  | + | 2.31E-04 | 3.87E-03 |
| endothelial cell proliferation                       | 10   | 3   | .26    | 11.74 | + | 3.65E-03 | 3.32E-02 |
| ↳epithelial cell proliferation                       | 11   | 3   | .28    | 10.67 | + | 4.56E-03 | 4.03E-02 |
| chondrocyte differentiation                          | 17   | 5   | .43    | 11.51 | + | 1.75E-04 | 3.19E-03 |
| ↳cartilage development                               | 18   | 5   | .46    | 10.87 | + | 2.19E-04 | 3.77E-03 |
| ↳connective tissue development                       | 18   | 5   | .46    | 10.87 | + | 2.19E-04 | 3.80E-03 |
| ↳tissue development                                  | 179  | 15  | 4.57   | 3.28  | + | 1.12E-04 | 2.27E-03 |
| protein stabilization                                | 11   | 3   | .28    | 10.67 | + | 4.56E-03 | 3.99E-02 |

|                                                           |                     |                    |       |       |   |          |          |
|-----------------------------------------------------------|---------------------|--------------------|-------|-------|---|----------|----------|
| glycolytic process                                        | <a href="#">20</a>  | <a href="#">5</a>  | .51   | 9.78  | + | 3.32E-04 | 5.27E-03 |
| ↳generation of precursor metabolites and energy           | <a href="#">103</a> | <a href="#">11</a> | 2.63  | 4.18  | + | 1.33E-04 | 2.61E-03 |
| ↳nucleotide phosphorylation                               | <a href="#">20</a>  | <a href="#">5</a>  | .51   | 9.78  | + | 3.32E-04 | 5.23E-03 |
| ↳organic substance catabolic process                      | <a href="#">703</a> | <a href="#">48</a> | 17.97 | 2.67  | + | 2.80E-09 | 2.75E-07 |
| ↳catabolic process                                        | <a href="#">888</a> | <a href="#">54</a> | 22.69 | 2.38  | + | 1.30E-08 | 1.07E-06 |
| ↳carboxylic acid metabolic process                        | <a href="#">331</a> | <a href="#">21</a> | 8.46  | 2.48  | + | 3.54E-04 | 5.49E-03 |
| ↳oxoacid metabolic process                                | <a href="#">342</a> | <a href="#">21</a> | 8.74  | 2.40  | + | 4.36E-04 | 6.39E-03 |
| ↳organic acid metabolic process                           | <a href="#">355</a> | <a href="#">21</a> | 9.07  | 2.31  | + | 6.07E-04 | 8.14E-03 |
| ↳ATP metabolic process                                    | <a href="#">56</a>  | <a href="#">6</a>  | 1.43  | 4.19  | + | 4.40E-03 | 3.91E-02 |
| Arp2/3 complex-mediated actin nucleation                  | <a href="#">18</a>  | <a href="#">4</a>  | .46   | 8.70  | + | 1.95E-03 | 2.11E-02 |
| ↳regulation of actin filament polymerization              | <a href="#">71</a>  | <a href="#">11</a> | 1.81  | 6.06  | + | 5.90E-06 | 1.93E-04 |
| ↳regulation of protein polymerization                     | <a href="#">75</a>  | <a href="#">11</a> | 1.92  | 5.74  | + | 9.43E-06 | 2.74E-04 |
| ↳regulation of protein complex assembly                   | <a href="#">94</a>  | <a href="#">12</a> | 2.40  | 5.00  | + | 1.34E-05 | 3.63E-04 |
| ↳regulation of cellular component organization            | <a href="#">396</a> | <a href="#">21</a> | 10.12 | 2.08  | + | 2.24E-03 | 2.32E-02 |
| ↳regulation of cellular component biogenesis              | <a href="#">140</a> | <a href="#">14</a> | 3.58  | 3.91  | + | 3.27E-05 | 8.34E-04 |
| ↳regulation of actin polymerization or depolymerization   | <a href="#">73</a>  | <a href="#">12</a> | 1.87  | 6.43  | + | 1.28E-06 | 5.41E-05 |
| ↳regulation of actin filament organization                | <a href="#">81</a>  | <a href="#">12</a> | 2.07  | 5.80  | + | 3.39E-06 | 1.21E-04 |
| ↳regulation of actin cytoskeleton organization            | <a href="#">106</a> | <a href="#">13</a> | 2.71  | 4.80  | + | 8.72E-06 | 2.65E-04 |
| ↳regulation of actin filament-based process               | <a href="#">107</a> | <a href="#">14</a> | 2.73  | 5.12  | + | 1.99E-06 | 8.06E-05 |
| ↳regulation of cytoskeleton organization                  | <a href="#">146</a> | <a href="#">15</a> | 3.73  | 4.02  | + | 1.29E-05 | 3.54E-04 |
| ↳regulation of organelle organization                     | <a href="#">264</a> | <a href="#">16</a> | 6.75  | 2.37  | + | 2.70E-03 | 2.60E-02 |
| ↳regulation of supramolecular fiber organization          | <a href="#">90</a>  | <a href="#">12</a> | 2.30  | 5.22  | + | 8.98E-06 | 2.69E-04 |
| ↳regulation of actin filament length                      | <a href="#">73</a>  | <a href="#">12</a> | 1.87  | 6.43  | + | 1.28E-06 | 5.52E-05 |
| ↳regulation of cellular component size                    | <a href="#">108</a> | <a href="#">13</a> | 2.76  | 4.71  | + | 1.05E-05 | 2.96E-04 |
| ↳regulation of anatomical structure size                  | <a href="#">120</a> | <a href="#">14</a> | 3.07  | 4.57  | + | 6.69E-06 | 2.09E-04 |
| ↳positive regulation of supramolecular fiber organization | <a href="#">48</a>  | <a href="#">6</a>  | 1.23  | 4.89  | + | 2.18E-03 | 2.31E-02 |
| ↳positive regulation of cellular component organization   | <a href="#">136</a> | <a href="#">10</a> | 3.48  | 2.88  | + | 3.67E-03 | 3.33E-02 |
| ↳positive regulation of cytoskeleton organization         | <a href="#">49</a>  | <a href="#">6</a>  | 1.25  | 4.79  | + | 2.40E-03 | 2.41E-02 |
| ↳positive regulation of organelle organization            | <a href="#">79</a>  | <a href="#">7</a>  | 2.02  | 3.47  | + | 5.67E-03 | 4.77E-02 |
| negative regulation of actin filament polymerization      | <a href="#">23</a>  | <a href="#">5</a>  | .59   | 8.51  | + | 5.77E-04 | 7.84E-03 |
| ribosomal large subunit assembly                          | <a href="#">23</a>  | <a href="#">5</a>  | .59   | 8.51  | + | 5.77E-04 | 7.78E-03 |
| ↳ribonucleoprotein complex assembly                       | <a href="#">110</a> | <a href="#">10</a> | 2.81  | 3.56  | + | 8.53E-04 | 1.07E-02 |
| ↳cellular protein-containing complex assembly             | <a href="#">367</a> | <a href="#">24</a> | 9.38  | 2.56  | + | 5.26E-05 | 1.21E-03 |
| ↳protein-containing complex assembly                      | <a href="#">394</a> | <a href="#">25</a> | 10.07 | 2.48  | + | 8.16E-05 | 1.77E-03 |
| ↳cellular component assembly                              | <a href="#">734</a> | <a href="#">37</a> | 18.76 | 1.97  | + | 1.44E-04 | 2.78E-03 |
| ↳cellular component biogenesis                            | <a href="#">867</a> | <a href="#">41</a> | 22.16 | 1.85  | + | 2.83E-04 | 4.59E-03 |
| ↳ribonucleoprotein complex subunit organization           | <a href="#">115</a> | <a href="#">10</a> | 2.94  | 3.40  | + | 1.17E-03 | 1.38E-02 |
| ↳ribosome biogenesis                                      | <a href="#">176</a> | <a href="#">13</a> | 4.50  | 2.89  | + | 9.54E-04 | 1.14E-02 |
| chaperone-mediated protein folding                        | <a href="#">26</a>  | <a href="#">5</a>  | .66   | 7.53  | + | 9.38E-04 | 1.14E-02 |
| ↳protein folding                                          | <a href="#">81</a>  | <a href="#">22</a> | 2.07  | 10.63 | + | 8.23E-15 | 8.49E-12 |
| endoplasmic reticulum unfolded protein response           | <a href="#">22</a>  | <a href="#">4</a>  | .56   | 7.11  | + | 3.69E-03 | 3.32E-02 |
| ↳response to endoplasmic reticulum stress                 | <a href="#">65</a>  | <a href="#">8</a>  | 1.66  | 4.82  | + | 4.59E-04 | 6.67E-03 |
| ↳cellular response to unfolded protein                    | <a href="#">29</a>  | <a href="#">6</a>  | .74   | 8.10  | + | 2.05E-04 | 3.58E-03 |
| ↳response to unfolded protein                             | <a href="#">29</a>  | <a href="#">6</a>  | .74   | 8.10  | + | 2.05E-04 | 3.61E-03 |
| ↳response to topologically incorrect protein              | <a href="#">41</a>  | <a href="#">7</a>  | 1.05  | 6.68  | + | 1.75E-04 | 3.22E-03 |
| ↳response to organic substance                            | <a href="#">558</a> | <a href="#">30</a> | 14.26 | 2.10  | + | 2.29E-04 | 3.90E-03 |
| ↳cellular response to topologically incorrect protein     | <a href="#">41</a>  | <a href="#">7</a>  | 1.05  | 6.68  | + | 1.75E-04 | 3.25E-03 |
| ↳cellular response to organic substance                   | <a href="#">488</a> | <a href="#">27</a> | 12.47 | 2.16  | + | 2.83E-04 | 4.57E-03 |
| regulation of cellular response to growth factor stimulus | <a href="#">30</a>  | <a href="#">5</a>  | .77   | 6.52  | + | 1.65E-03 | 1.84E-02 |
| granulocyte chemotaxis                                    | <a href="#">38</a>  | <a href="#">6</a>  | .97   | 6.18  | + | 7.36E-04 | 9.44E-03 |
| ↳myeloid leukocyte migration                              | <a href="#">48</a>  | <a href="#">10</a> | 1.23  | 8.15  | + | 1.52E-06 | 6.27E-05 |
| ↳leukocyte migration                                      | <a href="#">57</a>  | <a href="#">10</a> | 1.46  | 6.86  | + | 5.90E-06 | 1.90E-04 |
| ↳cell migration                                           | <a href="#">255</a> | <a href="#">28</a> | 6.52  | 4.30  | + | 6.51E-10 | 8.96E-08 |

|                                                                   |                      |                     |       |      |   |          |          |
|-------------------------------------------------------------------|----------------------|---------------------|-------|------|---|----------|----------|
| ↳cell motility                                                    | <a href="#">285</a>  | <a href="#">29</a>  | 7.28  | 3.98 | + | 1.61E-09 | 1.66E-07 |
| ↳movement of cell or subcellular component                        | <a href="#">549</a>  | <a href="#">35</a>  | 14.03 | 2.49 | + | 2.16E-06 | 8.59E-05 |
| ↳localization of cell                                             | <a href="#">285</a>  | <a href="#">29</a>  | 7.28  | 3.98 | + | 1.61E-09 | 1.75E-07 |
| ↳leukocyte chemotaxis                                             | <a href="#">47</a>   | <a href="#">9</a>   | 1.20  | 7.49 | + | 9.28E-06 | 2.74E-04 |
| ↳cell chemotaxis                                                  | <a href="#">81</a>   | <a href="#">9</a>   | 2.07  | 4.35 | + | 4.09E-04 | 6.21E-03 |
| response to toxic substance                                       | <a href="#">32</a>   | <a href="#">5</a>   | .82   | 6.11 | + | 2.13E-03 | 2.26E-02 |
| actin filament polymerization                                     | <a href="#">74</a>   | <a href="#">11</a>  | 1.89  | 5.82 | + | 8.41E-06 | 2.59E-04 |
| ↳protein polymerization                                           | <a href="#">89</a>   | <a href="#">11</a>  | 2.27  | 4.84 | + | 3.99E-05 | 9.47E-04 |
| negative regulation of cell death                                 | <a href="#">54</a>   | <a href="#">8</a>   | 1.38  | 5.80 | + | 1.47E-04 | 2.80E-03 |
| ↳regulation of cell death                                         | <a href="#">123</a>  | <a href="#">10</a>  | 3.14  | 3.18 | + | 1.86E-03 | 2.03E-02 |
| glutathione metabolic process                                     | <a href="#">35</a>   | <a href="#">5</a>   | .89   | 5.59 | + | 3.02E-03 | 2.82E-02 |
| ↳peptide metabolic process                                        | <a href="#">286</a>  | <a href="#">35</a>  | 7.31  | 4.79 | + | 2.72E-13 | 1.87E-10 |
| ↳cellular amide metabolic process                                 | <a href="#">369</a>  | <a href="#">36</a>  | 9.43  | 3.82 | + | 4.95E-11 | 1.70E-08 |
| ↳cellular modified amino acid metabolic process                   | <a href="#">67</a>   | <a href="#">8</a>   | 1.71  | 4.67 | + | 5.51E-04 | 7.69E-03 |
| muscle contraction                                                | <a href="#">43</a>   | <a href="#">6</a>   | 1.10  | 5.46 | + | 1.31E-03 | 1.51E-02 |
| ↳muscle system process                                            | <a href="#">45</a>   | <a href="#">6</a>   | 1.15  | 5.22 | + | 1.62E-03 | 1.82E-02 |
| developmental growth                                              | <a href="#">51</a>   | <a href="#">7</a>   | 1.30  | 5.37 | + | 5.75E-04 | 7.92E-03 |
| ↳growth                                                           | <a href="#">55</a>   | <a href="#">7</a>   | 1.41  | 4.98 | + | 8.64E-04 | 1.07E-02 |
| ribosomal small subunit biogenesis                                | <a href="#">51</a>   | <a href="#">7</a>   | 1.30  | 5.37 | + | 5.75E-04 | 7.86E-03 |
| negative regulation of endopeptidase activity                     | <a href="#">82</a>   | <a href="#">11</a>  | 2.10  | 5.25 | + | 2.01E-05 | 5.32E-04 |
| ↳negative regulation of peptidase activity                        | <a href="#">87</a>   | <a href="#">11</a>  | 2.22  | 4.95 | + | 3.30E-05 | 8.21E-04 |
| ↳negative regulation of hydrolase activity                        | <a href="#">102</a>  | <a href="#">12</a>  | 2.61  | 4.60 | + | 2.80E-05 | 7.23E-04 |
| ↳regulation of hydrolase activity                                 | <a href="#">287</a>  | <a href="#">16</a>  | 7.33  | 2.18 | + | 4.55E-03 | 4.03E-02 |
| ↳negative regulation of catalytic activity                        | <a href="#">169</a>  | <a href="#">12</a>  | 4.32  | 2.78 | + | 2.01E-03 | 2.15E-02 |
| ↳negative regulation of molecular function                        | <a href="#">196</a>  | <a href="#">13</a>  | 5.01  | 2.60 | + | 2.35E-03 | 2.38E-02 |
| ↳regulation of peptidase activity                                 | <a href="#">112</a>  | <a href="#">12</a>  | 2.86  | 4.19 | + | 6.45E-05 | 1.45E-03 |
| ↳regulation of proteolysis                                        | <a href="#">155</a>  | <a href="#">14</a>  | 3.96  | 3.53 | + | 9.05E-05 | 1.93E-03 |
| ↳regulation of protein metabolic process                          | <a href="#">581</a>  | <a href="#">29</a>  | 14.85 | 1.95 | + | 8.87E-04 | 1.08E-02 |
| ↳negative regulation of proteolysis                               | <a href="#">88</a>   | <a href="#">11</a>  | 2.25  | 4.89 | + | 3.63E-05 | 8.72E-04 |
| ↳negative regulation of cellular protein metabolic process        | <a href="#">164</a>  | <a href="#">12</a>  | 4.19  | 2.86 | + | 1.59E-03 | 1.81E-02 |
| ↳negative regulation of protein metabolic process                 | <a href="#">168</a>  | <a href="#">13</a>  | 4.29  | 3.03 | + | 6.38E-04 | 8.44E-03 |
| ↳regulation of cellular protein metabolic process                 | <a href="#">533</a>  | <a href="#">26</a>  | 13.62 | 1.91 | + | 2.27E-03 | 2.33E-02 |
| ↳regulation of endopeptidase activity                             | <a href="#">107</a>  | <a href="#">12</a>  | 2.73  | 4.39 | + | 4.30E-05 | 1.01E-03 |
| reactive oxygen species metabolic process                         | <a href="#">40</a>   | <a href="#">5</a>   | 1.02  | 4.89 | + | 5.07E-03 | 4.34E-02 |
| translational elongation                                          | <a href="#">216</a>  | <a href="#">26</a>  | 5.52  | 4.71 | + | 4.53E-10 | 8.50E-08 |
| ↳translation                                                      | <a href="#">216</a>  | <a href="#">26</a>  | 5.52  | 4.71 | + | 4.53E-10 | 7.79E-08 |
| ↳cellular protein metabolic process                               | <a href="#">1711</a> | <a href="#">94</a>  | 43.73 | 2.15 | + | 8.18E-12 | 4.22E-09 |
| ↳protein metabolic process                                        | <a href="#">2115</a> | <a href="#">105</a> | 54.05 | 1.94 | + | 9.97E-11 | 2.94E-08 |
| ↳peptide biosynthetic process                                     | <a href="#">219</a>  | <a href="#">28</a>  | 5.60  | 5.00 | + | 2.70E-11 | 1.11E-08 |
| ↳organonitrogen compound biosynthetic process                     | <a href="#">589</a>  | <a href="#">40</a>  | 15.05 | 2.66 | + | 7.06E-08 | 4.28E-06 |
| ↳amide biosynthetic process                                       | <a href="#">252</a>  | <a href="#">28</a>  | 6.44  | 4.35 | + | 5.10E-10 | 7.52E-08 |
| cellular response to growth factor stimulus                       | <a href="#">90</a>   | <a href="#">10</a>  | 2.30  | 4.35 | + | 1.98E-04 | 3.52E-03 |
| ↳response to growth factor                                        | <a href="#">90</a>   | <a href="#">10</a>  | 2.30  | 4.35 | + | 1.98E-04 | 3.55E-03 |
| response to inorganic substance                                   | <a href="#">54</a>   | <a href="#">6</a>   | 1.38  | 4.35 | + | 3.74E-03 | 3.35E-02 |
| proteasome-mediated ubiquitin-dependent protein catabolic process | <a href="#">194</a>  | <a href="#">20</a>  | 4.96  | 4.03 | + | 4.59E-07 | 2.26E-05 |
| ↳proteasomal protein catabolic process                            | <a href="#">205</a>  | <a href="#">20</a>  | 5.24  | 3.82 | + | 1.02E-06 | 4.47E-05 |
| ↳proteolysis involved in cellular protein catabolic process       | <a href="#">331</a>  | <a href="#">30</a>  | 8.46  | 3.55 | + | 9.91E-09 | 8.89E-07 |
| ↳proteolysis                                                      | <a href="#">693</a>  | <a href="#">50</a>  | 17.71 | 2.82 | + | 2.22E-10 | 4.58E-08 |
| ↳cellular protein catabolic process                               | <a href="#">333</a>  | <a href="#">30</a>  | 8.51  | 3.53 | + | 1.12E-08 | 9.67E-07 |
| ↳cellular macromolecule catabolic process                         | <a href="#">429</a>  | <a href="#">31</a>  | 10.96 | 2.83 | + | 6.32E-07 | 2.97E-05 |
| ↳macromolecule catabolic process                                  | <a href="#">463</a>  | <a href="#">34</a>  | 11.83 | 2.87 | + | 1.27E-07 | 6.89E-06 |
| ↳cellular catabolic process                                       | <a href="#">765</a>  | <a href="#">43</a>  | 19.55 | 2.20 | + | 4.60E-06 | 1.58E-04 |
| ↳protein catabolic process                                        | <a href="#">355</a>  | <a href="#">33</a>  | 9.07  | 3.64 | + | 9.98E-10 | 1.14E-07 |
| ↳organonitrogen compound catabolic process                        | <a href="#">457</a>  | <a href="#">38</a>  | 11.68 | 3.25 | + | 9.87E-10 | 1.20E-07 |



|                                                                                           |                       |                     |        |        |   |          |          |
|-------------------------------------------------------------------------------------------|-----------------------|---------------------|--------|--------|---|----------|----------|
| <a href="#">ubiquitin-dependent protein catabolic process</a>                             | <a href="#">276</a>   | <a href="#">22</a>  | 7.05   | 3.12   | + | 6.45E-06 | 2.05E-04 |
| ↳ <a href="#">modification-dependent protein catabolic process</a>                        | <a href="#">285</a>   | <a href="#">23</a>  | 7.28   | 3.16   | + | 3.30E-06 | 1.20E-04 |
| ↳ <a href="#">modification-dependent macromolecule catabolic process</a>                  | <a href="#">290</a>   | <a href="#">23</a>  | 7.41   | 3.10   | + | 4.32E-06 | 1.51E-04 |
| <a href="#">peptidyl-lysine modification</a>                                              | <a href="#">91</a>    | <a href="#">8</a>   | 2.33   | 3.44   | + | 3.33E-03 | 3.07E-02 |
| <a href="#">cellular amino acid metabolic process</a>                                     | <a href="#">123</a>   | <a href="#">10</a>  | 3.14   | 3.18   | + | 1.86E-03 | 2.02E-02 |
| <a href="#">cell morphogenesis involved in differentiation</a>                            | <a href="#">181</a>   | <a href="#">14</a>  | 4.63   | 3.03   | + | 4.02E-04 | 6.19E-03 |
| ↳ <a href="#">cell morphogenesis</a>                                                      | <a href="#">255</a>   | <a href="#">19</a>  | 6.52   | 2.92   | + | 6.37E-05 | 1.45E-03 |
| ↳ <a href="#">cellular component morphogenesis</a>                                        | <a href="#">281</a>   | <a href="#">20</a>  | 7.18   | 2.79   | + | 7.46E-05 | 1.64E-03 |
| ↳ <a href="#">cell development</a>                                                        | <a href="#">397</a>   | <a href="#">20</a>  | 10.15  | 1.97   | + | 6.00E-03 | 4.97E-02 |
| <a href="#">oxidation-reduction process</a>                                               | <a href="#">220</a>   | <a href="#">17</a>  | 5.62   | 3.02   | + | 1.01E-04 | 2.14E-03 |
| <a href="#">cell adhesion</a>                                                             | <a href="#">288</a>   | <a href="#">19</a>  | 7.36   | 2.58   | + | 2.79E-04 | 4.60E-03 |
| ↳ <a href="#">biological adhesion</a>                                                     | <a href="#">288</a>   | <a href="#">19</a>  | 7.36   | 2.58   | + | 2.79E-04 | 4.56E-03 |
| <a href="#">enzyme linked receptor protein signaling pathway</a>                          | <a href="#">213</a>   | <a href="#">14</a>  | 5.44   | 2.57   | + | 1.76E-03 | 1.94E-02 |
| <a href="#">cell death</a>                                                                | <a href="#">186</a>   | <a href="#">12</a>  | 4.75   | 2.52   | + | 4.19E-03 | 3.74E-02 |
| Unclassified                                                                              | <a href="#">12808</a> | <a href="#">262</a> | 327.32 | .80    | - | 5.80E-08 | 3.63E-06 |
| <a href="#">regulation of transcription by RNA polymerase II</a>                          | <a href="#">745</a>   | <a href="#">5</a>   | 19.04  | .26    | - | 2.92E-04 | 4.68E-03 |
| ↳ <a href="#">regulation of transcription, DNA-templated</a>                              | <a href="#">1117</a>  | <a href="#">5</a>   | 28.55  | .18    | - | 1.14E-07 | 6.70E-06 |
| ↳ <a href="#">regulation of gene expression</a>                                           | <a href="#">1368</a>  | <a href="#">12</a>  | 34.96  | .34    | - | 1.02E-05 | 2.94E-04 |
| ↳ <a href="#">regulation of nucleic acid-templated transcription</a>                      | <a href="#">1117</a>  | <a href="#">5</a>   | 28.55  | .18    | - | 1.14E-07 | 6.51E-06 |
| ↳ <a href="#">regulation of RNA biosynthetic process</a>                                  | <a href="#">1117</a>  | <a href="#">5</a>   | 28.55  | .18    | - | 1.14E-07 | 6.33E-06 |
| ↳ <a href="#">regulation of RNA metabolic process</a>                                     | <a href="#">1222</a>  | <a href="#">7</a>   | 31.23  | .22    | - | 2.57E-07 | 1.30E-05 |
| ↳ <a href="#">regulation of nucleobase-containing compound metabolic process</a>          | <a href="#">1263</a>  | <a href="#">7</a>   | 32.28  | .22    | - | 1.32E-07 | 6.97E-06 |
| ↳ <a href="#">regulation of cellular biosynthetic process</a>                             | <a href="#">1234</a>  | <a href="#">11</a>  | 31.54  | .35    | - | 3.34E-05 | 8.22E-04 |
| ↳ <a href="#">regulation of biosynthetic process</a>                                      | <a href="#">1240</a>  | <a href="#">11</a>  | 31.69  | .35    | - | 3.37E-05 | 8.18E-04 |
| ↳ <a href="#">regulation of macromolecule biosynthetic process</a>                        | <a href="#">1223</a>  | <a href="#">9</a>   | 31.25  | .29    | - | 4.85E-06 | 1.61E-04 |
| ↳ <a href="#">regulation of cellular macromolecule biosynthetic process</a>               | <a href="#">1216</a>  | <a href="#">9</a>   | 31.08  | .29    | - | 4.75E-06 | 1.61E-04 |
| <a href="#">transcription by RNA polymerase II</a>                                        | <a href="#">772</a>   | <a href="#">5</a>   | 19.73  | .25    | - | 1.51E-04 | 2.83E-03 |
| ↳ <a href="#">transcription, DNA-templated</a>                                            | <a href="#">1159</a>  | <a href="#">5</a>   | 29.62  | .17    | - | 3.85E-08 | 2.74E-06 |
| ↳ <a href="#">nucleic acid-templated transcription</a>                                    | <a href="#">1159</a>  | <a href="#">5</a>   | 29.62  | .17    | - | 3.85E-08 | 2.84E-06 |
| ↳ <a href="#">RNA biosynthetic process</a>                                                | <a href="#">1166</a>  | <a href="#">5</a>   | 29.80  | .17    | - | 3.88E-08 | 2.67E-06 |
| ↳ <a href="#">nucleobase-containing compound biosynthetic process</a>                     | <a href="#">1376</a>  | <a href="#">11</a>  | 35.16  | .31    | - | 2.90E-06 | 1.07E-04 |
| ↳ <a href="#">aromatic compound biosynthetic process</a>                                  | <a href="#">1399</a>  | <a href="#">11</a>  | 35.75  | .31    | - | 2.18E-06 | 8.32E-05 |
| ↳ <a href="#">organic cyclic compound biosynthetic process</a>                            | <a href="#">1433</a>  | <a href="#">11</a>  | 36.62  | .30    | - | 8.06E-07 | 3.70E-05 |
| ↳ <a href="#">heterocycle biosynthetic process</a>                                        | <a href="#">1399</a>  | <a href="#">11</a>  | 35.75  | .31    | - | 2.18E-06 | 8.48E-05 |
| ↳ <a href="#">RNA metabolic process</a>                                                   | <a href="#">1673</a>  | <a href="#">18</a>  | 42.75  | .42    | - | 2.15E-05 | 5.62E-04 |
| ↳ <a href="#">nucleic acid metabolic process</a>                                          | <a href="#">1911</a>  | <a href="#">20</a>  | 48.84  | .41    | - | 2.70E-06 | 1.01E-04 |
| <a href="#">G protein-coupled receptor signaling pathway</a>                              | <a href="#">682</a>   | <a href="#">4</a>   | 17.43  | .23    | - | 2.53E-04 | 4.22E-03 |
| <a href="#">positive regulation of transcription, DNA-templated</a>                       | <a href="#">421</a>   | <a href="#">2</a>   | 10.76  | .19    | - | 2.54E-03 | 2.51E-02 |
| ↳ <a href="#">positive regulation of nucleic acid-templated transcription</a>             | <a href="#">421</a>   | <a href="#">2</a>   | 10.76  | .19    | - | 2.54E-03 | 2.52E-02 |
| ↳ <a href="#">positive regulation of RNA biosynthetic process</a>                         | <a href="#">421</a>   | <a href="#">2</a>   | 10.76  | .19    | - | 2.54E-03 | 2.50E-02 |
| ↳ <a href="#">positive regulation of nucleobase-containing compound metabolic process</a> | <a href="#">461</a>   | <a href="#">3</a>   | 11.78  | .25    | - | 5.98E-03 | 4.98E-02 |
| <a href="#">cellular lipid metabolic process</a>                                          | <a href="#">317</a>   | <a href="#">1</a>   | 8.10   | .12    | - | 5.63E-03 | 4.76E-02 |
| <a href="#">lymphocyte mediated immunity</a>                                              | <a href="#">232</a>   | <a href="#">0</a>   | 5.93   | < 0.01 | - | 4.93E-03 | 4.28E-02 |
| ↳ <a href="#">leukocyte mediated immunity</a>                                             | <a href="#">235</a>   | <a href="#">0</a>   | 6.01   | < 0.01 | - | 5.00E-03 | 4.32E-02 |
| <a href="#">antigen receptor-mediated signaling pathway</a>                               | <a href="#">236</a>   | <a href="#">0</a>   | 6.03   | < 0.01 | - | 5.03E-03 | 4.32E-02 |
| ↳ <a href="#">immune response-activating cell surface receptor signaling pathway</a>      | <a href="#">248</a>   | <a href="#">0</a>   | 6.34   | < 0.01 | - | 3.34E-03 | 3.06E-02 |
| ↳ <a href="#">immune response-regulating cell surface receptor signaling pathway</a>      | <a href="#">250</a>   | <a href="#">0</a>   | 6.39   | < 0.01 | - | 3.37E-03 | 3.07E-02 |
| ↳ <a href="#">immune response-regulating signaling pathway</a>                            | <a href="#">269</a>   | <a href="#">0</a>   | 6.87   | < 0.01 | - | 2.33E-03 | 2.37E-02 |
| ↳ <a href="#">immune response-activating signal transduction</a>                          | <a href="#">267</a>   | <a href="#">0</a>   | 6.82   | < 0.01 | - | 2.29E-03 | 2.34E-02 |
| <a href="#">negative regulation of transcription, DNA-templated</a>                       | <a href="#">305</a>   | <a href="#">0</a>   | 7.79   | < 0.01 | - | 6.88E-04 | 8.98E-03 |
| ↳ <a href="#">negative regulation of nucleic acid-templated transcription</a>             | <a href="#">305</a>   | <a href="#">0</a>   | 7.79   | < 0.01 | - | 6.88E-04 | 9.04E-03 |
| ↳ <a href="#">negative regulation of RNA biosynthetic process</a>                         | <a href="#">305</a>   | <a href="#">0</a>   | 7.79   | < 0.01 | - | 6.88E-04 | 8.93E-03 |
| ↳ <a href="#">negative regulation of RNA metabolic process</a>                            | <a href="#">316</a>   | <a href="#">0</a>   | 8.08   | < 0.01 | - | 7.25E-04 | 9.35E-03 |
| ↳ <a href="#">negative regulation of nucleobase-containing compound metabolic process</a> | <a href="#">329</a>   | <a href="#">0</a>   | 8.41   | < 0.01 | - | 4.79E-04 | 6.92E-03 |

|                                                                                    |                     |   |       |        |   |          |          |
|------------------------------------------------------------------------------------|---------------------|---|-------|--------|---|----------|----------|
| <a href="#">negative regulation of cellular biosynthetic process</a>               | <a href="#">354</a> | 1 | 9.05  | .11    | - | 2.82E-03 | 2.68E-02 |
| <a href="#">negative regulation of biosynthetic process</a>                        | <a href="#">354</a> | 1 | 9.05  | .11    | - | 2.82E-03 | 2.69E-02 |
| <a href="#">negative regulation of macromolecule biosynthetic process</a>          | <a href="#">345</a> | 1 | 8.82  | .11    | - | 2.69E-03 | 2.62E-02 |
| <a href="#">negative regulation of gene expression</a>                             | <a href="#">409</a> | 0 | 10.45 | < 0.01 | - | 6.95E-05 | 1.54E-03 |
| <a href="#">negative regulation of cellular macromolecule biosynthetic process</a> | <a href="#">345</a> | 1 | 8.82  | .11    | - | 2.69E-03 | 2.61E-02 |
| <a href="#">second-messenger-mediated signaling</a>                                | <a href="#">228</a> | 0 | 5.83  | < 0.01 | - | 4.91E-03 | 4.28E-02 |
| <a href="#">sensory perception</a>                                                 | <a href="#">242</a> | 0 | 6.18  | < 0.01 | - | 5.31E-03 | 4.53E-02 |
| <a href="#">nervous system process</a>                                             | <a href="#">320</a> | 1 | 8.18  | .12    | - | 5.72E-03 | 4.80E-02 |



**PANTHER 15.0 released!**

Analysis Summary: Please report in publication [BM-MSC secretome from ND mice](#)

**Analysis Type:** PANTHER Overrepresentation Test (Released 20190711)

---

**Annotation Version and Release Date:** PANTHER version 15 Released 2020-02-14

---

**Analyzed List:** Client Text Box Input (Mus musculus) [Change](#)

---

**Reference List:** Mus musculus (all genes in database) [Change](#)

---

**Annotation Data Set:** PANTHER GO-Slim Biological Process [?](#)

---

**Test Type:**  Fisher's Exact  Binomial

---

**Correction:**  Calculate False Discovery Rate  Use the Bonferroni correction for multiple testing [?](#)  No correction

Results [?](#)

|                               | Reference list                     | Client Text Box Input          |
|-------------------------------|------------------------------------|--------------------------------|
| Uniquely Mapped IDs:          | <a href="#">22265</a> out of 22265 | <a href="#">482</a> out of 482 |
| Unmapped IDs:                 | <a href="#">0</a>                  | <a href="#">3</a>              |
| Multiple mapping information: | <a href="#">0</a>                  | <a href="#">9</a>              |

Export [Table](#) [XML with user input ids](#) [JSON with user input ids](#) View: [-- Please select a chart to display --](#)

Displaying only results for FDR P < 0.05, [click here to display all results](#)

|                                                                    | Mus musculus (REF)   |                     | Client Text Box Input ( <a href="#">Hierarchy</a> <a href="#">NEW!</a> <a href="#">?</a> ) |                 |     |             |          |
|--------------------------------------------------------------------|----------------------|---------------------|--------------------------------------------------------------------------------------------|-----------------|-----|-------------|----------|
|                                                                    | #                    | #                   | expected                                                                                   | Fold Enrichment | +/- | raw P value | FDR      |
| <a href="#">PANTHER GO-Slim Biological Process</a>                 |                      |                     |                                                                                            |                 |     |             |          |
| <a href="#">collagen fibril organization</a>                       | <a href="#">11</a>   | <a href="#">6</a>   | .24                                                                                        | 25.20           | +   | 8.91E-07    | 6.57E-05 |
| ↳ <a href="#">supramolecular fiber organization</a>                | <a href="#">236</a>  | <a href="#">28</a>  | 5.11                                                                                       | 5.48            | +   | 2.93E-12    | 6.05E-09 |
| ↳ <a href="#">cellular process</a>                                 | <a href="#">7925</a> | <a href="#">222</a> | 171.56                                                                                     | 1.29            | +   | 3.02E-06    | 1.45E-04 |
| ↳ <a href="#">extracellular matrix organization</a>                | <a href="#">56</a>   | <a href="#">14</a>  | 1.21                                                                                       | 11.55           | +   | 1.99E-10    | 5.14E-08 |
| ↳ <a href="#">extracellular structure organization</a>             | <a href="#">63</a>   | <a href="#">14</a>  | 1.36                                                                                       | 10.27           | +   | 7.57E-10    | 1.56E-07 |
| ↳ <a href="#">protein-containing complex subunit organization</a>  | <a href="#">481</a>  | <a href="#">29</a>  | 10.41                                                                                      | 2.79            | +   | 1.71E-06    | 9.52E-05 |
| <a href="#">glucose 6-phosphate metabolic process</a>              | <a href="#">9</a>    | <a href="#">3</a>   | .19                                                                                        | 15.40           | +   | 1.80E-03    | 2.80E-02 |
| ↳ <a href="#">cellular metabolic process</a>                       | <a href="#">4357</a> | <a href="#">124</a> | 94.32                                                                                      | 1.31            | +   | 1.16E-03    | 1.97E-02 |
| ↳ <a href="#">metabolic process</a>                                | <a href="#">4857</a> | <a href="#">136</a> | 105.15                                                                                     | 1.29            | +   | 1.22E-03    | 2.07E-02 |
| <a href="#">glycolytic process</a>                                 | <a href="#">20</a>   | <a href="#">6</a>   | .43                                                                                        | 13.86           | +   | 1.41E-05    | 5.01E-04 |
| ↳ <a href="#">generation of precursor metabolites and energy</a>   | <a href="#">103</a>  | <a href="#">10</a>  | 2.23                                                                                       | 4.48            | +   | 1.47E-04    | 3.53E-03 |
| ↳ <a href="#">nucleotide phosphorylation</a>                       | <a href="#">20</a>   | <a href="#">6</a>   | .43                                                                                        | 13.86           | +   | 1.41E-05    | 4.93E-04 |
| ↳ <a href="#">organic substance catabolic process</a>              | <a href="#">703</a>  | <a href="#">47</a>  | 15.22                                                                                      | 3.09            | +   | 3.68E-11    | 1.27E-08 |
| ↳ <a href="#">catabolic process</a>                                | <a href="#">888</a>  | <a href="#">54</a>  | 19.22                                                                                      | 2.81            | +   | 3.44E-11    | 1.42E-08 |
| ↳ <a href="#">carbohydrate metabolic process</a>                   | <a href="#">133</a>  | <a href="#">9</a>   | 2.88                                                                                       | 3.13            | +   | 3.34E-03    | 4.62E-02 |
| ↳ <a href="#">purine-containing compound metabolic process</a>     | <a href="#">152</a>  | <a href="#">10</a>  | 3.29                                                                                       | 3.04            | +   | 2.45E-03    | 3.59E-02 |
| ↳ <a href="#">cellular aromatic compound metabolic process</a>     | <a href="#">2163</a> | <a href="#">27</a>  | 46.83                                                                                      | .58             | -   | 1.71E-03    | 2.70E-02 |
| ↳ <a href="#">nitrogen compound metabolic process</a>              | <a href="#">4212</a> | <a href="#">118</a> | 91.18                                                                                      | 1.29            | +   | 2.74E-03    | 3.88E-02 |
| ↳ <a href="#">organic cyclic compound metabolic process</a>        | <a href="#">2218</a> | <a href="#">27</a>  | 48.02                                                                                      | .56             | -   | 8.66E-04    | 1.57E-02 |
| ↳ <a href="#">organonitrogen compound metabolic process</a>        | <a href="#">2527</a> | <a href="#">107</a> | 54.71                                                                                      | 1.96            | +   | 2.73E-11    | 1.41E-08 |
| ↳ <a href="#">heterocycle metabolic process</a>                    | <a href="#">2151</a> | <a href="#">27</a>  | 46.57                                                                                      | .58             | -   | 1.71E-03    | 2.71E-02 |
| ↳ <a href="#">nucleobase-containing compound metabolic process</a> | <a href="#">2112</a> | <a href="#">26</a>  | 45.72                                                                                      | .57             | -   | 1.53E-03    | 2.49E-02 |
| ↳ <a href="#">ATP metabolic process</a>                            | <a href="#">56</a>   | <a href="#">6</a>   | 1.21                                                                                       | 4.95            | +   | 1.98E-03    | 3.05E-02 |
| <a href="#">Arp2/3 complex-mediated actin nucleation</a>           | <a href="#">18</a>   | <a href="#">5</a>   | .39                                                                                        | 12.83           | +   | 1.03E-04    | 2.58E-03 |

|                                                           |                     |                    |       |       |   |          |          |
|-----------------------------------------------------------|---------------------|--------------------|-------|-------|---|----------|----------|
| ↳positive regulation of actin filament polymerization     | <a href="#">34</a>  | <a href="#">5</a>  | .74   | 6.79  | + | 1.33E-03 | 2.23E-02 |
| ↳regulation of actin filament polymerization              | <a href="#">71</a>  | <a href="#">9</a>  | 1.54  | 5.86  | + | 4.89E-05 | 1.33E-03 |
| ↳regulation of protein polymerization                     | <a href="#">75</a>  | <a href="#">9</a>  | 1.62  | 5.54  | + | 7.20E-05 | 1.86E-03 |
| ↳regulation of protein complex assembly                   | <a href="#">94</a>  | <a href="#">9</a>  | 2.03  | 4.42  | + | 3.45E-04 | 6.84E-03 |
| ↳regulation of cellular component biogenesis              | <a href="#">140</a> | <a href="#">10</a> | 3.03  | 3.30  | + | 1.39E-03 | 2.29E-02 |
| ↳regulation of actin polymerization or depolymerization   | <a href="#">73</a>  | <a href="#">10</a> | 1.58  | 6.33  | + | 1.01E-05 | 3.95E-04 |
| ↳regulation of actin filament organization                | <a href="#">81</a>  | <a href="#">10</a> | 1.75  | 5.70  | + | 2.30E-05 | 7.21E-04 |
| ↳regulation of actin cytoskeleton organization            | <a href="#">106</a> | <a href="#">10</a> | 2.29  | 4.36  | + | 1.83E-04 | 4.24E-03 |
| ↳regulation of actin filament-based process               | <a href="#">107</a> | <a href="#">10</a> | 2.32  | 4.32  | + | 1.96E-04 | 4.45E-03 |
| ↳regulation of cytoskeleton organization                  | <a href="#">146</a> | <a href="#">11</a> | 3.16  | 3.48  | + | 5.38E-04 | 1.03E-02 |
| ↳regulation of supramolecular fiber organization          | <a href="#">90</a>  | <a href="#">10</a> | 1.95  | 5.13  | + | 5.24E-05 | 1.40E-03 |
| ↳regulation of actin filament length                      | <a href="#">73</a>  | <a href="#">10</a> | 1.58  | 6.33  | + | 1.01E-05 | 4.03E-04 |
| ↳regulation of cellular component size                    | <a href="#">108</a> | <a href="#">10</a> | 2.34  | 4.28  | + | 2.10E-04 | 4.62E-03 |
| ↳regulation of anatomical structure size                  | <a href="#">120</a> | <a href="#">11</a> | 2.60  | 4.23  | + | 1.12E-04 | 2.74E-03 |
| ↳positive regulation of supramolecular fiber organization | <a href="#">48</a>  | <a href="#">7</a>  | 1.04  | 6.74  | + | 1.55E-04 | 3.67E-03 |
| ↳positive regulation of cytoskeleton organization         | <a href="#">49</a>  | <a href="#">7</a>  | 1.06  | 6.60  | + | 1.74E-04 | 4.07E-03 |
| ↳positive regulation of organelle organization            | <a href="#">79</a>  | <a href="#">7</a>  | 1.71  | 4.09  | + | 2.34E-03 | 3.55E-02 |
| ↳positive regulation of protein polymerization            | <a href="#">38</a>  | <a href="#">5</a>  | .82   | 6.08  | + | 2.07E-03 | 3.17E-02 |
| ↳positive regulation of protein complex assembly          | <a href="#">43</a>  | <a href="#">5</a>  | .93   | 5.37  | + | 3.38E-03 | 4.60E-02 |
| ↳positive regulation of cellular component biogenesis     | <a href="#">64</a>  | <a href="#">6</a>  | 1.39  | 4.33  | + | 3.66E-03 | 4.82E-02 |
| ↳actin filament organization                              | <a href="#">159</a> | <a href="#">18</a> | 3.44  | 5.23  | + | 4.53E-08 | 5.84E-06 |
| ↳actin cytoskeleton organization                          | <a href="#">238</a> | <a href="#">20</a> | 5.15  | 3.88  | + | 7.12E-07 | 5.44E-05 |
| ↳cytoskeleton organization                                | <a href="#">560</a> | <a href="#">26</a> | 12.12 | 2.14  | + | 3.96E-04 | 7.72E-03 |
| ↳actin filament-based process                             | <a href="#">246</a> | <a href="#">20</a> | 5.33  | 3.76  | + | 1.15E-06 | 7.18E-05 |
| response to hypoxia                                       | <a href="#">12</a>  | <a href="#">3</a>  | .26   | 11.55 | + | 3.56E-03 | 4.74E-02 |
| response to oxidative stress                              | <a href="#">25</a>  | <a href="#">5</a>  | .54   | 9.24  | + | 3.85E-04 | 7.56E-03 |
| granulocyte chemotaxis                                    | <a href="#">38</a>  | <a href="#">7</a>  | .82   | 8.51  | + | 4.15E-05 | 1.17E-03 |
| ↳myeloid leukocyte migration                              | <a href="#">48</a>  | <a href="#">8</a>  | 1.04  | 7.70  | + | 2.23E-05 | 7.09E-04 |
| ↳leukocyte migration                                      | <a href="#">57</a>  | <a href="#">8</a>  | 1.23  | 6.48  | + | 6.71E-05 | 1.75E-03 |
| ↳cell migration                                           | <a href="#">255</a> | <a href="#">20</a> | 5.52  | 3.62  | + | 1.92E-06 | 1.04E-04 |
| ↳cell motility                                            | <a href="#">285</a> | <a href="#">21</a> | 6.17  | 3.40  | + | 2.69E-06 | 1.35E-04 |
| ↳movement of cell or subcellular component                | <a href="#">549</a> | <a href="#">26</a> | 11.88 | 2.19  | + | 3.18E-04 | 6.37E-03 |
| ↳locomotion                                               | <a href="#">356</a> | <a href="#">23</a> | 7.71  | 2.98  | + | 7.12E-06 | 3.06E-04 |
| ↳localization of cell                                     | <a href="#">285</a> | <a href="#">21</a> | 6.17  | 3.40  | + | 2.69E-06 | 1.39E-04 |
| ↳leukocyte chemotaxis                                     | <a href="#">47</a>  | <a href="#">8</a>  | 1.02  | 7.86  | + | 1.95E-05 | 6.28E-04 |
| ↳cell chemotaxis                                          | <a href="#">81</a>  | <a href="#">8</a>  | 1.75  | 4.56  | + | 6.04E-04 | 1.12E-02 |
| ↳cellular response to chemical stimulus                   | <a href="#">641</a> | <a href="#">26</a> | 13.88 | 1.87  | + | 3.62E-03 | 4.79E-02 |
| nucleobase metabolic process                              | <a href="#">23</a>  | <a href="#">4</a>  | .50   | 8.03  | + | 2.37E-03 | 3.55E-02 |
| ribosomal large subunit assembly                          | <a href="#">23</a>  | <a href="#">4</a>  | .50   | 8.03  | + | 2.37E-03 | 3.52E-02 |
| ↳ribonucleoprotein complex assembly                       | <a href="#">110</a> | <a href="#">8</a>  | 2.38  | 3.36  | + | 3.68E-03 | 4.81E-02 |
| ↳cellular protein-containing complex assembly             | <a href="#">367</a> | <a href="#">19</a> | 7.94  | 2.39  | + | 8.79E-04 | 1.58E-02 |
| ↳protein-containing complex assembly                      | <a href="#">394</a> | <a href="#">19</a> | 8.53  | 2.23  | + | 1.55E-03 | 2.49E-02 |
| chemokine-mediated signaling pathway                      | <a href="#">35</a>  | <a href="#">6</a>  | .76   | 7.92  | + | 2.10E-04 | 4.67E-03 |
| ↳cellular response to chemokine                           | <a href="#">36</a>  | <a href="#">6</a>  | .78   | 7.70  | + | 2.41E-04 | 5.02E-03 |
| ↳response to chemokine                                    | <a href="#">36</a>  | <a href="#">6</a>  | .78   | 7.70  | + | 2.41E-04 | 4.97E-03 |
| ↳response to cytokine                                     | <a href="#">162</a> | <a href="#">10</a> | 3.51  | 2.85  | + | 3.77E-03 | 4.90E-02 |
| ↳response to organic substance                            | <a href="#">558</a> | <a href="#">25</a> | 12.08 | 2.07  | + | 1.06E-03 | 1.84E-02 |
| glucose metabolic process                                 | <a href="#">26</a>  | <a href="#">4</a>  | .56   | 7.11  | + | 3.53E-03 | 4.76E-02 |
| chaperone-mediated protein folding                        | <a href="#">26</a>  | <a href="#">4</a>  | .56   | 7.11  | + | 3.53E-03 | 4.73E-02 |
| ↳protein folding                                          | <a href="#">81</a>  | <a href="#">17</a> | 1.75  | 9.69  | + | 2.50E-11 | 1.72E-08 |
| negative regulation of endopeptidase activity             | <a href="#">82</a>  | <a href="#">12</a> | 1.78  | 6.76  | + | 7.08E-07 | 5.62E-05 |
| ↳negative regulation of peptidase activity                | <a href="#">87</a>  | <a href="#">12</a> | 1.88  | 6.37  | + | 1.25E-06 | 7.56E-05 |

|                                                                   |                       |                     |        |      |   |          |          |
|-------------------------------------------------------------------|-----------------------|---------------------|--------|------|---|----------|----------|
| ↳negative regulation of hydrolase activity                        | <a href="#">102</a>   | <a href="#">12</a>  | 2.21   | 5.43 | + | 5.59E-06 | 2.51E-04 |
| ↳regulation of hydrolase activity                                 | <a href="#">287</a>   | <a href="#">17</a>  | 6.21   | 2.74 | + | 2.90E-04 | 5.93E-03 |
| ↳negative regulation of catalytic activity                        | <a href="#">169</a>   | <a href="#">12</a>  | 3.66   | 3.28 | + | 5.03E-04 | 9.71E-03 |
| ↳negative regulation of molecular function                        | <a href="#">196</a>   | <a href="#">13</a>  | 4.24   | 3.06 | + | 5.48E-04 | 1.03E-02 |
| ↳regulation of peptidase activity                                 | <a href="#">112</a>   | <a href="#">13</a>  | 2.42   | 5.36 | + | 2.62E-06 | 1.39E-04 |
| ↳regulation of proteolysis                                        | <a href="#">155</a>   | <a href="#">14</a>  | 3.36   | 4.17 | + | 1.56E-05 | 5.21E-04 |
| ↳regulation of protein metabolic process                          | <a href="#">581</a>   | <a href="#">27</a>  | 12.58  | 2.15 | + | 2.97E-04 | 6.02E-03 |
| ↳negative regulation of proteolysis                               | <a href="#">88</a>    | <a href="#">12</a>  | 1.91   | 6.30 | + | 1.39E-06 | 8.19E-05 |
| ↳negative regulation of cellular protein metabolic process        | <a href="#">164</a>   | <a href="#">13</a>  | 3.55   | 3.66 | + | 1.08E-04 | 2.69E-03 |
| ↳negative regulation of protein metabolic process                 | <a href="#">168</a>   | <a href="#">14</a>  | 3.64   | 3.85 | + | 3.58E-05 | 1.06E-03 |
| ↳regulation of cellular protein metabolic process                 | <a href="#">533</a>   | <a href="#">24</a>  | 11.54  | 2.08 | + | 1.39E-03 | 2.28E-02 |
| ↳regulation of endopeptidase activity                             | <a href="#">107</a>   | <a href="#">13</a>  | 2.32   | 5.61 | + | 1.65E-06 | 9.45E-05 |
| cellular response to topologically incorrect protein              | <a href="#">41</a>    | <a href="#">5</a>   | .89    | 5.63 | + | 2.80E-03 | 3.94E-02 |
| ↳response to topologically incorrect protein                      | <a href="#">41</a>    | <a href="#">5</a>   | .89    | 5.63 | + | 2.80E-03 | 3.91E-02 |
| actin filament polymerization                                     | <a href="#">74</a>    | <a href="#">9</a>   | 1.60   | 5.62 | + | 6.55E-05 | 1.73E-03 |
| ↳protein polymerization                                           | <a href="#">89</a>    | <a href="#">9</a>   | 1.93   | 4.67 | + | 2.37E-04 | 5.00E-03 |
| ↳actin polymerization or depolymerization                         | <a href="#">79</a>    | <a href="#">11</a>  | 1.71   | 6.43 | + | 3.18E-06 | 1.49E-04 |
| muscle contraction                                                | <a href="#">43</a>    | <a href="#">5</a>   | .93    | 5.37 | + | 3.38E-03 | 4.66E-02 |
| carbohydrate biosynthetic process                                 | <a href="#">43</a>    | <a href="#">5</a>   | .93    | 5.37 | + | 3.38E-03 | 4.63E-02 |
| negative regulation of cell death                                 | <a href="#">54</a>    | <a href="#">6</a>   | 1.17   | 5.13 | + | 1.67E-03 | 2.67E-02 |
| response to endoplasmic reticulum stress                          | <a href="#">65</a>    | <a href="#">7</a>   | 1.41   | 4.97 | + | 8.25E-04 | 1.51E-02 |
| proteasome-mediated ubiquitin-dependent protein catabolic process | <a href="#">194</a>   | <a href="#">16</a>  | 4.20   | 3.81 | + | 1.14E-05 | 4.35E-04 |
| ↳proteasomal protein catabolic process                            | <a href="#">205</a>   | <a href="#">17</a>  | 4.44   | 3.83 | + | 5.69E-06 | 2.50E-04 |
| ↳proteolysis involved in cellular protein catabolic process       | <a href="#">331</a>   | <a href="#">28</a>  | 7.17   | 3.91 | + | 3.74E-09 | 5.94E-07 |
| ↳proteolysis                                                      | <a href="#">693</a>   | <a href="#">47</a>  | 15.00  | 3.13 | + | 2.33E-11 | 2.40E-08 |
| ↳protein metabolic process                                        | <a href="#">2115</a>  | <a href="#">89</a>  | 45.79  | 1.94 | + | 3.02E-09 | 5.20E-07 |
| ↳cellular protein catabolic process                               | <a href="#">333</a>   | <a href="#">28</a>  | 7.21   | 3.88 | + | 4.23E-09 | 6.23E-07 |
| ↳cellular macromolecule catabolic process                         | <a href="#">429</a>   | <a href="#">29</a>  | 9.29   | 3.12 | + | 1.90E-07 | 2.18E-05 |
| ↳macromolecule catabolic process                                  | <a href="#">463</a>   | <a href="#">32</a>  | 10.02  | 3.19 | + | 2.70E-08 | 3.72E-06 |
| ↳cellular catabolic process                                       | <a href="#">765</a>   | <a href="#">42</a>  | 16.56  | 2.54 | + | 1.14E-07 | 1.39E-05 |
| ↳protein catabolic process                                        | <a href="#">355</a>   | <a href="#">31</a>  | 7.69   | 4.03 | + | 2.61E-10 | 5.99E-08 |
| ↳organonitrogen compound catabolic process                        | <a href="#">457</a>   | <a href="#">36</a>  | 9.89   | 3.64 | + | 1.32E-10 | 3.90E-08 |
| ↳cellular protein metabolic process                               | <a href="#">1711</a>  | <a href="#">77</a>  | 37.04  | 2.08 | + | 1.98E-09 | 3.71E-07 |
| ↳ubiquitin-dependent protein catabolic process                    | <a href="#">276</a>   | <a href="#">17</a>  | 5.97   | 2.85 | + | 1.88E-04 | 4.32E-03 |
| ↳modification-dependent protein catabolic process                 | <a href="#">285</a>   | <a href="#">18</a>  | 6.17   | 2.92 | + | 9.14E-05 | 2.33E-03 |
| ↳modification-dependent macromolecule catabolic process           | <a href="#">290</a>   | <a href="#">18</a>  | 6.28   | 2.87 | + | 1.12E-04 | 2.73E-03 |
| animal organ morphogenesis                                        | <a href="#">104</a>   | <a href="#">8</a>   | 2.25   | 3.55 | + | 2.67E-03 | 3.85E-02 |
| translational elongation                                          | <a href="#">216</a>   | <a href="#">16</a>  | 4.68   | 3.42 | + | 3.88E-05 | 1.13E-03 |
| ↳translation                                                      | <a href="#">216</a>   | <a href="#">16</a>  | 4.68   | 3.42 | + | 3.88E-05 | 1.11E-03 |
| ↳peptide biosynthetic process                                     | <a href="#">219</a>   | <a href="#">16</a>  | 4.74   | 3.37 | + | 4.52E-05 | 1.26E-03 |
| ↳amide biosynthetic process                                       | <a href="#">252</a>   | <a href="#">16</a>  | 5.46   | 2.93 | + | 2.09E-04 | 4.70E-03 |
| ↳cellular amide metabolic process                                 | <a href="#">369</a>   | <a href="#">23</a>  | 7.99   | 2.88 | + | 1.23E-05 | 4.53E-04 |
| ↳peptide metabolic process                                        | <a href="#">286</a>   | <a href="#">23</a>  | 6.19   | 3.71 | + | 2.18E-07 | 2.36E-05 |
| oxidation-reduction process                                       | <a href="#">220</a>   | <a href="#">16</a>  | 4.76   | 3.36 | + | 4.76E-05 | 1.31E-03 |
| tissue development                                                | <a href="#">179</a>   | <a href="#">11</a>  | 3.88   | 2.84 | + | 2.52E-03 | 3.66E-02 |
| enzyme linked receptor protein signaling pathway                  | <a href="#">213</a>   | <a href="#">13</a>  | 4.61   | 2.82 | + | 1.13E-03 | 1.94E-02 |
| Unclassified                                                      | <a href="#">12808</a> | <a href="#">231</a> | 277.27 | .83  | - | 3.27E-05 | 9.93E-04 |
| organic substance transport                                       | <a href="#">801</a>   | <a href="#">6</a>   | 17.34  | .35  | - | 2.68E-03 | 3.84E-02 |
| ↳transport                                                        | <a href="#">1822</a>  | <a href="#">20</a>  | 39.44  | .51  | - | 6.91E-04 | 1.27E-02 |
| ↳establishment of localization                                    | <a href="#">1847</a>  | <a href="#">20</a>  | 39.98  | .50  | - | 5.41E-04 | 1.02E-02 |
| G protein-coupled receptor signaling pathway                      | <a href="#">682</a>   | <a href="#">4</a>   | 14.76  | .27  | - | 1.77E-03 | 2.77E-02 |
| transcription by RNA polymerase II                                | <a href="#">772</a>   | <a href="#">2</a>   | 16.71  | .12  | - | 1.79E-05 | 5.87E-04 |
| ↳transcription, DNA-templated                                     | <a href="#">1159</a>  | <a href="#">4</a>   | 25.09  | .16  | - | 3.24E-07 | 3.19E-05 |

|                                                                                  |                      |                    |       |        |   |          |          |
|----------------------------------------------------------------------------------|----------------------|--------------------|-------|--------|---|----------|----------|
| ↳ <a href="#">nucleic acid-templated transcription</a>                           | <a href="#">1159</a> | <a href="#">4</a>  | 25.09 | .16    | - | 3.24E-07 | 3.35E-05 |
| ↳ <a href="#">RNA biosynthetic process</a>                                       | <a href="#">1166</a> | <a href="#">4</a>  | 25.24 | .16    | - | 3.30E-07 | 3.09E-05 |
| ↳ <a href="#">nucleobase-containing compound biosynthetic process</a>            | <a href="#">1376</a> | <a href="#">7</a>  | 29.79 | .23    | - | 9.68E-07 | 6.89E-05 |
| ↳ <a href="#">aromatic compound biosynthetic process</a>                         | <a href="#">1399</a> | <a href="#">7</a>  | 30.29 | .23    | - | 4.71E-07 | 3.89E-05 |
| ↳ <a href="#">organic cyclic compound biosynthetic process</a>                   | <a href="#">1433</a> | <a href="#">7</a>  | 31.02 | .23    | - | 3.44E-07 | 3.09E-05 |
| ↳ <a href="#">heterocycle biosynthetic process</a>                               | <a href="#">1399</a> | <a href="#">7</a>  | 30.29 | .23    | - | 4.71E-07 | 4.05E-05 |
| ↳ <a href="#">RNA metabolic process</a>                                          | <a href="#">1673</a> | <a href="#">13</a> | 36.22 | .36    | - | 9.44E-06 | 3.98E-04 |
| ↳ <a href="#">nucleic acid metabolic process</a>                                 | <a href="#">1911</a> | <a href="#">15</a> | 41.37 | .36    | - | 2.83E-06 | 1.39E-04 |
| <a href="#">negative regulation of gene expression</a>                           | <a href="#">409</a>  | <a href="#">1</a>  | 8.85  | .11    | - | 2.72E-03 | 3.88E-02 |
| ↳ <a href="#">regulation of gene expression</a>                                  | <a href="#">1368</a> | <a href="#">9</a>  | 29.61 | .30    | - | 1.16E-05 | 4.36E-04 |
| <a href="#">cellular lipid metabolic process</a>                                 | <a href="#">317</a>  | <a href="#">0</a>  | 6.86  | < 0.01 | - | 2.36E-03 | 3.56E-02 |
| <a href="#">positive regulation of transcription by RNA polymerase II</a>        | <a href="#">345</a>  | <a href="#">0</a>  | 7.47  | < 0.01 | - | 1.03E-03 | 1.80E-02 |
| ↳ <a href="#">regulation of transcription by RNA polymerase II</a>               | <a href="#">745</a>  | <a href="#">2</a>  | 16.13 | .12    | - | 2.48E-05 | 7.65E-04 |
| ↳ <a href="#">regulation of transcription, DNA-templated</a>                     | <a href="#">1117</a> | <a href="#">4</a>  | 24.18 | .17    | - | 1.02E-06 | 7.01E-05 |
| ↳ <a href="#">regulation of nucleic acid-templated transcription</a>             | <a href="#">1117</a> | <a href="#">4</a>  | 24.18 | .17    | - | 1.02E-06 | 6.78E-05 |
| ↳ <a href="#">regulation of RNA biosynthetic process</a>                         | <a href="#">1117</a> | <a href="#">4</a>  | 24.18 | .17    | - | 1.02E-06 | 6.57E-05 |
| ↳ <a href="#">regulation of RNA metabolic process</a>                            | <a href="#">1222</a> | <a href="#">7</a>  | 26.45 | .26    | - | 1.41E-05 | 4.86E-04 |
| ↳ <a href="#">regulation of nucleobase-containing compound metabolic process</a> | <a href="#">1263</a> | <a href="#">7</a>  | 27.34 | .26    | - | 5.05E-06 | 2.31E-04 |
| ↳ <a href="#">regulation of cellular biosynthetic process</a>                    | <a href="#">1234</a> | <a href="#">7</a>  | 26.71 | .26    | - | 9.87E-06 | 4.08E-04 |
| ↳ <a href="#">regulation of biosynthetic process</a>                             | <a href="#">1240</a> | <a href="#">7</a>  | 26.84 | .26    | - | 1.01E-05 | 4.09E-04 |
| ↳ <a href="#">regulation of macromolecule biosynthetic process</a>               | <a href="#">1223</a> | <a href="#">7</a>  | 26.48 | .26    | - | 1.42E-05 | 4.81E-04 |
| ↳ <a href="#">regulation of cellular macromolecule biosynthetic process</a>      | <a href="#">1216</a> | <a href="#">7</a>  | 26.32 | .27    | - | 1.38E-05 | 4.99E-04 |
| ↳ <a href="#">positive regulation of transcription, DNA-templated</a>            | <a href="#">421</a>  | <a href="#">0</a>  | 9.11  | < 0.01 | - | 2.17E-04 | 4.67E-03 |
| ↳ <a href="#">positive regulation of nucleic acid-templated transcription</a>    | <a href="#">421</a>  | <a href="#">0</a>  | 9.11  | < 0.01 | - | 2.17E-04 | 4.72E-03 |
| ↳ <a href="#">positive regulation of RNA biosynthetic process</a>                | <a href="#">421</a>  | <a href="#">0</a>  | 9.11  | < 0.01 | - | 2.17E-04 | 4.62E-03 |
| ↳ <a href="#">positive regulation of cellular biosynthetic process</a>           | <a href="#">458</a>  | <a href="#">1</a>  | 9.91  | .10    | - | 8.96E-04 | 1.60E-02 |
| ↳ <a href="#">positive regulation of biosynthetic process</a>                    | <a href="#">461</a>  | <a href="#">1</a>  | 9.98  | .10    | - | 8.98E-04 | 1.58E-02 |
| ↳ <a href="#">positive regulation of macromolecule biosynthetic process</a>      | <a href="#">451</a>  | <a href="#">1</a>  | 9.76  | .10    | - | 1.34E-03 | 2.23E-02 |
| <a href="#">nervous system process</a>                                           | <a href="#">320</a>  | <a href="#">0</a>  | 6.93  | < 0.01 | - | 2.43E-03 | 3.58E-02 |

[PANTHER 15.0 released!](#)

Analysis Summary: Please report in publication [vWAT-MSC secretome from ND mice](#)

**Analysis Type:** PANTHER Overrepresentation Test (Released 20190711)

---

**Annotation Version and Release Date:** PANTHER version 15 Released 2020-02-14

---

**Analyzed List:** Client Text Box Input (Mus musculus) [Change](#)

---

**Reference List:** Mus musculus (all genes in database) [Change](#)

---

**Annotation Data Set:**  [?](#)

---

**Test Type:**  Fisher's Exact  Binomial

---

**Correction:**  Calculate False Discovery Rate  Use the Bonferroni correction for multiple testing [?](#)  No correction

Results [?](#)

|                               | Reference list                     | Client Text Box Input          |
|-------------------------------|------------------------------------|--------------------------------|
| Uniquely Mapped IDs:          | <a href="#">22265</a> out of 22265 | <a href="#">361</a> out of 363 |
| Unmapped IDs:                 | <a href="#">0</a>                  | <a href="#">0</a>              |
| Multiple mapping information: | <a href="#">0</a>                  | <a href="#">5</a>              |

Export [Table](#) [XML with user input ids](#) [JSON with user input ids](#) View:

Displaying only results for FDR P < 0.05, [click here to display all results](#)

|                                                                                   | Mus musculus (REF)    |                     | Client Text Box Input |                 |     |             |          |
|-----------------------------------------------------------------------------------|-----------------------|---------------------|-----------------------|-----------------|-----|-------------|----------|
| PANTHER Pathways                                                                  | #                     | #                   | expected              | Fold Enrichment | +/- | raw P value | FDR      |
| <a href="#">Asparagine and aspartate biosynthesis</a>                             | <a href="#">4</a>     | <a href="#">2</a>   | .07                   | 30.67           | +   | 3.69E-03    | 4.08E-02 |
| <a href="#">Pentose phosphate pathway</a>                                         | <a href="#">9</a>     | <a href="#">4</a>   | .15                   | 27.26           | +   | 4.15E-05    | 9.85E-04 |
| <a href="#">ATP synthesis</a>                                                     | <a href="#">7</a>     | <a href="#">3</a>   | .11                   | 26.29           | +   | 4.52E-04    | 9.38E-03 |
| <a href="#">Glycolysis</a>                                                        | <a href="#">26</a>    | <a href="#">8</a>   | .42                   | 18.87           | +   | 5.12E-08    | 1.70E-06 |
| <a href="#">Cytoskeletal regulation by Rho GTPase</a>                             | <a href="#">79</a>    | <a href="#">15</a>  | 1.29                  | 11.65           | +   | 2.65E-11    | 1.47E-09 |
| <a href="#">Parkinson disease</a>                                                 | <a href="#">95</a>    | <a href="#">18</a>  | 1.55                  | 11.62           | +   | 2.75E-13    | 2.28E-11 |
| <a href="#">De novo purine biosynthesis</a>                                       | <a href="#">29</a>    | <a href="#">4</a>   | .47                   | 8.46            | +   | 1.85E-03    | 2.55E-02 |
| <a href="#">Integrin signalling pathway</a>                                       | <a href="#">190</a>   | <a href="#">21</a>  | 3.10                  | 6.78            | +   | 3.25E-11    | 1.35E-09 |
| <a href="#">Blood coagulation</a>                                                 | <a href="#">51</a>    | <a href="#">5</a>   | .83                   | 6.01            | +   | 2.02E-03    | 2.58E-02 |
| <a href="#">Huntington disease</a>                                                | <a href="#">150</a>   | <a href="#">12</a>  | 2.45                  | 4.91            | +   | 1.26E-05    | 3.49E-04 |
| <a href="#">FGF signaling pathway</a>                                             | <a href="#">120</a>   | <a href="#">8</a>   | 1.96                  | 4.09            | +   | 1.09E-03    | 2.02E-02 |
| <a href="#">Alzheimer disease-presenilin pathway</a>                              | <a href="#">125</a>   | <a href="#">8</a>   | 2.04                  | 3.93            | +   | 1.40E-03    | 2.32E-02 |
| <a href="#">EGF receptor signaling pathway</a>                                    | <a href="#">136</a>   | <a href="#">8</a>   | 2.22                  | 3.61            | +   | 2.31E-03    | 2.74E-02 |
| <a href="#">Inflammation mediated by chemokine and cytokine signaling pathway</a> | <a href="#">258</a>   | <a href="#">12</a>  | 4.21                  | 2.85            | +   | 1.48E-03    | 2.23E-02 |
| Unclassified                                                                      | <a href="#">19669</a> | <a href="#">256</a> | 320.68                | .80             | -   | 1.51E-19    | 2.51E-17 |

**PANTHER 15.0 released!**

Analysis Summary: Please report in publication [s](#)SWAT-MSC secretome from ND mice

**Analysis Type:** PANTHER Overrepresentation Test (Released 20190711)

---

**Annotation Version and Release Date:** PANTHER version 15 Released 2020-02-14

---

**Analyzed List:** Client Text Box Input (Mus musculus) [Change](#)

---

**Reference List:** Mus musculus (all genes in database) [Change](#)

---

**Annotation Data Set:**  [?](#)

---

**Test Type:**  Fisher's Exact  Binomial

---

**Correction:**  Calculate False Discovery Rate  Use the Bonferroni correction for multiple testing [?](#)  No correction

Results [?](#)

|                               | Reference list                     | Client Text Box Input          |
|-------------------------------|------------------------------------|--------------------------------|
| Uniquely Mapped IDs:          | <a href="#">22265</a> out of 22265 | <a href="#">572</a> out of 569 |
| Unmapped IDs:                 | <a href="#">0</a>                  | <a href="#">1</a>              |
| Multiple mapping information: | <a href="#">0</a>                  | <a href="#">15</a>             |

Export [Table](#) [XML with user input ids](#) [JSON with user input ids](#) View:

Displaying only results for FDR P < 0.05, [click here to display all results](#)

|                                                                                   | Mus musculus (REF)    |                     | Client Text Box Input |                 |     |             |          |
|-----------------------------------------------------------------------------------|-----------------------|---------------------|-----------------------|-----------------|-----|-------------|----------|
|                                                                                   | #                     | #                   | expected              | Fold Enrichment | +/- | raw P value | FDR      |
| <a href="#">PANTHER Pathways</a>                                                  |                       |                     |                       |                 |     |             |          |
| <a href="#">Pentose phosphate pathway</a>                                         | <a href="#">9</a>     | <a href="#">4</a>   | .23                   | 17.39           | +   | 2.28E-04    | 4.21E-03 |
| <a href="#">Purine metabolism</a>                                                 | <a href="#">8</a>     | <a href="#">3</a>   | .20                   | 14.67           | +   | 2.19E-03    | 2.79E-02 |
| <a href="#">Adenine and hypoxanthine salvage pathway</a>                          | <a href="#">8</a>     | <a href="#">3</a>   | .20                   | 14.67           | +   | 2.19E-03    | 2.59E-02 |
| <a href="#">Glycolysis</a>                                                        | <a href="#">26</a>    | <a href="#">8</a>   | .66                   | 12.04           | +   | 1.45E-06    | 4.82E-05 |
| <a href="#">Parkinson disease</a>                                                 | <a href="#">95</a>    | <a href="#">21</a>  | 2.43                  | 8.65            | +   | 1.05E-12    | 5.80E-11 |
| <a href="#">Cytoskeletal regulation by Rho GTPase</a>                             | <a href="#">79</a>    | <a href="#">16</a>  | 2.02                  | 7.93            | +   | 1.61E-09    | 6.67E-08 |
| <a href="#">Axon guidance mediated by semaphorins</a>                             | <a href="#">23</a>    | <a href="#">4</a>   | .59                   | 6.81            | +   | 4.25E-03    | 4.41E-02 |
| <a href="#">Integrin signalling pathway</a>                                       | <a href="#">190</a>   | <a href="#">33</a>  | 4.86                  | 6.80            | +   | 1.78E-16    | 1.47E-14 |
| <a href="#">De novo purine biosynthesis</a>                                       | <a href="#">29</a>    | <a href="#">5</a>   | .74                   | 6.75            | +   | 1.44E-03    | 2.00E-02 |
| <a href="#">Axon guidance mediated by Slit/Robo</a>                               | <a href="#">24</a>    | <a href="#">4</a>   | .61                   | 6.52            | +   | 4.86E-03    | 4.74E-02 |
| <a href="#">Blood coagulation</a>                                                 | <a href="#">51</a>    | <a href="#">8</a>   | 1.30                  | 6.14            | +   | 1.03E-04    | 2.13E-03 |
| <a href="#">Huntington disease</a>                                                | <a href="#">150</a>   | <a href="#">16</a>  | 3.83                  | 4.17            | +   | 4.30E-06    | 1.19E-04 |
| <a href="#">FGF signaling pathway</a>                                             | <a href="#">120</a>   | <a href="#">11</a>  | 3.07                  | 3.59            | +   | 4.48E-04    | 7.43E-03 |
| <a href="#">CCKR signaling map</a>                                                | <a href="#">159</a>   | <a href="#">12</a>  | 4.06                  | 2.95            | +   | 1.24E-03    | 1.88E-02 |
| <a href="#">Inflammation mediated by chemokine and cytokine signaling pathway</a> | <a href="#">258</a>   | <a href="#">19</a>  | 6.59                  | 2.88            | +   | 7.37E-05    | 1.75E-03 |
| <a href="#">EGF receptor signaling pathway</a>                                    | <a href="#">136</a>   | <a href="#">10</a>  | 3.48                  | 2.88            | +   | 3.67E-03    | 4.07E-02 |
| Unclassified                                                                      | <a href="#">19669</a> | <a href="#">411</a> | 502.66                | .82             | -   | 1.02E-24    | 1.70E-22 |

[PANTHER 15.0 released!](#)

Analysis Summary: Please report in publication [BM-MSC secretome from ND mice](#)

**Analysis Type:** PANTHER Overrepresentation Test (Released 20190711)

---

**Annotation Version and Release Date:** PANTHER version 15 Released 2020-02-14

---

**Analyzed List:** Client Text Box Input (Mus musculus) [Change](#)

---

**Reference List:** Mus musculus (all genes in database) [Change](#)

---

**Annotation Data Set:** PANTHER Pathways [?](#)

---

**Test Type:**  Fisher's Exact  Binomial

---

**Correction:**  Calculate False Discovery Rate  Use the Bonferroni correction for multiple testing [?](#)  No correction

Results [?](#)

|                               | Reference list                     | Client Text Box Input          |
|-------------------------------|------------------------------------|--------------------------------|
| Uniquely Mapped IDs:          | <a href="#">22265</a> out of 22265 | <a href="#">482</a> out of 482 |
| Unmapped IDs:                 | <a href="#">0</a>                  | <a href="#">3</a>              |
| Multiple mapping information: | <a href="#">0</a>                  | <a href="#">9</a>              |

Export [Table](#) [XML with user input ids](#) [JSON with user input ids](#) View: -- Please select a chart to display --

Displaying only results for FDR P < 0.05, [click here to display all results](#)

|                                                                                   | Mus musculus (REF)    |                     | Client Text Box Input |                 |     |             |          |
|-----------------------------------------------------------------------------------|-----------------------|---------------------|-----------------------|-----------------|-----|-------------|----------|
| PANTHER Pathways                                                                  | #                     | #                   | expected              | Fold Enrichment | +/- | raw P value | FDR      |
| <a href="#">Pentose phosphate pathway</a>                                         | <a href="#">9</a>     | <a href="#">4</a>   | .19                   | 20.53           | +   | 1.22E-04    | 2.54E-03 |
| <a href="#">Glycolysis</a>                                                        | <a href="#">26</a>    | <a href="#">9</a>   | .56                   | 15.99           | +   | 3.46E-08    | 1.44E-06 |
| <a href="#">Plasminogen activating cascade</a>                                    | <a href="#">17</a>    | <a href="#">5</a>   | .37                   | 13.59           | +   | 8.18E-05    | 1.94E-03 |
| <a href="#">Pyruvate metabolism</a>                                               | <a href="#">12</a>    | <a href="#">3</a>   | .26                   | 11.55           | +   | 3.56E-03    | 4.54E-02 |
| <a href="#">Blood coagulation</a>                                                 | <a href="#">51</a>    | <a href="#">10</a>  | 1.10                  | 9.06            | +   | 5.70E-07    | 1.58E-05 |
| <a href="#">Parkinson disease</a>                                                 | <a href="#">95</a>    | <a href="#">17</a>  | 2.06                  | 8.27            | +   | 2.23E-10    | 1.24E-08 |
| <a href="#">De novo purine biosynthesis</a>                                       | <a href="#">29</a>    | <a href="#">5</a>   | .63                   | 7.96            | +   | 7.01E-04    | 1.29E-02 |
| <a href="#">Cytoskeletal regulation by Rho GTPase</a>                             | <a href="#">79</a>    | <a href="#">12</a>  | 1.71                  | 7.02            | +   | 4.95E-07    | 1.64E-05 |
| <a href="#">Integrin signalling pathway</a>                                       | <a href="#">190</a>   | <a href="#">27</a>  | 4.11                  | 6.56            | +   | 1.56E-13    | 1.29E-11 |
| <a href="#">Alzheimer disease-presenilin pathway</a>                              | <a href="#">125</a>   | <a href="#">9</a>   | 2.71                  | 3.33            | +   | 2.26E-03    | 3.12E-02 |
| <a href="#">Huntington disease</a>                                                | <a href="#">150</a>   | <a href="#">10</a>  | 3.25                  | 3.08            | +   | 2.24E-03    | 3.38E-02 |
| <a href="#">Inflammation mediated by chemokine and cytokine signaling pathway</a> | <a href="#">258</a>   | <a href="#">14</a>  | 5.59                  | 2.51            | +   | 2.12E-03    | 3.51E-02 |
| Unclassified                                                                      | <a href="#">19669</a> | <a href="#">346</a> | 425.80                | .81             | -   | 2.74E-22    | 4.54E-20 |



**PANTHER 15.0 released!**

Analysis Summary: Please report in publication [?](#) **vWAT-MSC secretome from HFD mice**

**Analysis Type:** PANTHER Overrepresentation Test (Released 20190711)

---

**Annotation Version and Release Date:** PANTHER version 15 Released 2020-02-14

---

**Analyzed List:** Client Text Box Input (Mus musculus) [Change](#)

---

**Reference List:** Mus musculus (all genes in database) [Change](#)

---

**Annotation Data Set:** PANTHER GO-Slim Cellular Component [?](#)

---

**Test Type:**  Fisher's Exact  Binomial

---

**Correction:**  Calculate False Discovery Rate  Use the Bonferroni correction for multiple testing [?](#)  No correction

Results [?](#)

|                               | Reference list                     | Client Text Box Input          |
|-------------------------------|------------------------------------|--------------------------------|
| Uniquely Mapped IDs:          | <a href="#">22265</a> out of 22265 | <a href="#">377</a> out of 378 |
| Unmapped IDs:                 | <a href="#">0</a>                  | <a href="#">3</a>              |
| Multiple mapping information: | 0                                  | <a href="#">10</a>             |

Export [Table](#) [XML with user input ids](#) [JSON with user input ids](#) View: [-- Please select a chart to display --](#)

Displaying only results for FDR P < 0.05, [click here to display all results](#)

|                                                                | Mus musculus (REF)   | Client Text Box Input ( <a href="#">Hierarchy</a> <b>NEW!</b> <a href="#">?</a> ) |          |                 |     |             |          |
|----------------------------------------------------------------|----------------------|-----------------------------------------------------------------------------------|----------|-----------------|-----|-------------|----------|
|                                                                | #                    | #                                                                                 | expected | Fold Enrichment | +/- | raw P value | FDR      |
| <a href="#">PANTHER GO-Slim Cellular Component</a>             |                      |                                                                                   |          |                 |     |             |          |
| <a href="#">proteasome core complex, alpha-subunit complex</a> | <a href="#">8</a>    | <a href="#">7</a>                                                                 | .14      | 51.54           | +   | 1.96E-09    | 7.84E-08 |
| ↳ <a href="#">proteasome complex</a>                           | <a href="#">39</a>   | <a href="#">14</a>                                                                | .66      | 21.14           | +   | 1.37E-13    | 1.78E-11 |
| ↳ <a href="#">endopeptidase complex</a>                        | <a href="#">39</a>   | <a href="#">14</a>                                                                | .66      | 21.14           | +   | 1.37E-13    | 2.37E-11 |
| ↳ <a href="#">peptidase complex</a>                            | <a href="#">55</a>   | <a href="#">14</a>                                                                | .93      | 14.99           | +   | 6.92E-12    | 3.60E-10 |
| ↳ <a href="#">intracellular part</a>                           | <a href="#">6691</a> | <a href="#">144</a>                                                               | 113.60   | 1.27            | +   | 1.02E-03    | 1.33E-02 |
| ↳ <a href="#">intracellular</a>                                | <a href="#">6721</a> | <a href="#">145</a>                                                               | 114.10   | 1.27            | +   | 8.46E-04    | 1.16E-02 |
| <a href="#">Arp2/3 protein complex</a>                         | <a href="#">9</a>    | <a href="#">4</a>                                                                 | .15      | 26.18           | +   | 4.85E-05    | 7.88E-04 |
| ↳ <a href="#">cytoskeletal part</a>                            | <a href="#">486</a>  | <a href="#">22</a>                                                                | 8.25     | 2.67            | +   | 5.04E-05    | 7.94E-04 |
| ↳ <a href="#">cytoskeleton</a>                                 | <a href="#">586</a>  | <a href="#">22</a>                                                                | 9.95     | 2.21            | +   | 9.84E-04    | 1.31E-02 |
| ↳ <a href="#">actin cytoskeleton</a>                           | <a href="#">160</a>  | <a href="#">19</a>                                                                | 2.72     | 6.99            | +   | 1.84E-10    | 8.72E-09 |
| <a href="#">collagen trimer</a>                                | <a href="#">17</a>   | <a href="#">7</a>                                                                 | .29      | 24.25           | +   | 9.26E-08    | 2.68E-06 |
| <a href="#">collagen-containing extracellular matrix</a>       | <a href="#">66</a>   | <a href="#">15</a>                                                                | 1.12     | 13.39           | +   | 4.95E-12    | 2.86E-10 |
| ↳ <a href="#">extracellular matrix</a>                         | <a href="#">177</a>  | <a href="#">22</a>                                                                | 3.00     | 7.32            | +   | 2.91E-12    | 1.89E-10 |
|                                                                | <a href="#">1253</a> | <a href="#">71</a>                                                                | 21.27    | 3.34            | +   | 1.42E-18    | 3.68E-16 |



|                                                          |                       |                     |        |       |   |          |          |
|----------------------------------------------------------|-----------------------|---------------------|--------|-------|---|----------|----------|
| ↳ <a href="#">extracellular region part</a>              |                       |                     |        |       |   |          |          |
| ↳ <a href="#">extracellular region</a>                   | <a href="#">1253</a>  | <a href="#">71</a>  | 21.27  | 3.34  | + | 1.42E-18 | 7.36E-16 |
| <a href="#">actin filament</a>                           | <a href="#">70</a>    | <a href="#">13</a>  | 1.19   | 10.94 | + | 1.17E-09 | 5.08E-08 |
| ↳ <a href="#">polymeric cytoskeletal fiber</a>           | <a href="#">246</a>   | <a href="#">16</a>  | 4.18   | 3.83  | + | 9.46E-06 | 2.14E-04 |
| ↳ <a href="#">supramolecular fiber</a>                   | <a href="#">298</a>   | <a href="#">21</a>  | 5.06   | 4.15  | + | 1.11E-07 | 3.04E-06 |
| ↳ <a href="#">supramolecular polymer</a>                 | <a href="#">301</a>   | <a href="#">22</a>  | 5.11   | 4.31  | + | 3.01E-08 | 1.12E-06 |
| ↳ <a href="#">supramolecular complex</a>                 | <a href="#">301</a>   | <a href="#">22</a>  | 5.11   | 4.31  | + | 3.01E-08 | 1.04E-06 |
| <a href="#">cytosolic small ribosomal subunit</a>        | <a href="#">40</a>    | <a href="#">7</a>   | .68    | 10.31 | + | 1.21E-05 | 2.33E-04 |
| ↳ <a href="#">cytosolic part</a>                         | <a href="#">162</a>   | <a href="#">14</a>  | 2.75   | 5.09  | + | 1.65E-06 | 4.08E-05 |
| ↳ <a href="#">cytoplasmic part</a>                       | <a href="#">2902</a>  | <a href="#">80</a>  | 49.27  | 1.62  | + | 1.49E-05 | 2.77E-04 |
| ↳ <a href="#">cytoplasm</a>                              | <a href="#">4183</a>  | <a href="#">132</a> | 71.02  | 1.86  | + | 2.39E-13 | 2.49E-11 |
| ↳ <a href="#">cytosol</a>                                | <a href="#">753</a>   | <a href="#">46</a>  | 12.78  | 3.60  | + | 2.63E-13 | 2.28E-11 |
| ↳ <a href="#">cytosolic ribosome</a>                     | <a href="#">104</a>   | <a href="#">12</a>  | 1.77   | 6.80  | + | 5.69E-07 | 1.48E-05 |
| ↳ <a href="#">ribosome</a>                               | <a href="#">151</a>   | <a href="#">12</a>  | 2.56   | 4.68  | + | 1.99E-05 | 3.57E-04 |
| ↳ <a href="#">small ribosomal subunit</a>                | <a href="#">57</a>    | <a href="#">7</a>   | .97    | 7.23  | + | 9.37E-05 | 1.39E-03 |
| ↳ <a href="#">ribosomal subunit</a>                      | <a href="#">143</a>   | <a href="#">12</a>  | 2.43   | 4.94  | + | 1.20E-05 | 2.40E-04 |
| <a href="#">cortical actin cytoskeleton</a>              | <a href="#">38</a>    | <a href="#">5</a>   | .65    | 7.75  | + | 7.22E-04 | 1.01E-02 |
| ↳ <a href="#">cortical cytoskeleton</a>                  | <a href="#">42</a>    | <a href="#">5</a>   | .71    | 7.01  | + | 1.09E-03 | 1.38E-02 |
| ↳ <a href="#">cell cortex part</a>                       | <a href="#">91</a>    | <a href="#">7</a>   | 1.54   | 4.53  | + | 1.29E-03 | 1.59E-02 |
| <a href="#">extracellular space</a>                      | <a href="#">1169</a>  | <a href="#">58</a>  | 19.85  | 2.92  | + | 6.88E-13 | 5.11E-11 |
| Unclassified                                             | <a href="#">12713</a> | <a href="#">162</a> | 215.83 | .75   | - | 4.26E-08 | 1.30E-06 |
| <a href="#">integral component of plasma membrane</a>    | <a href="#">770</a>   | <a href="#">1</a>   | 13.07  | .08   | - | 4.42E-05 | 7.67E-04 |
| ↳ <a href="#">integral component of membrane</a>         | <a href="#">1114</a>  | <a href="#">3</a>   | 18.91  | .16   | - | 1.14E-05 | 2.38E-04 |
| ↳ <a href="#">intrinsic component of membrane</a>        | <a href="#">1141</a>  | <a href="#">3</a>   | 19.37  | .15   | - | 8.00E-06 | 1.89E-04 |
| ↳ <a href="#">membrane part</a>                          | <a href="#">2301</a>  | <a href="#">15</a>  | 39.06  | .38   | - | 1.03E-05 | 2.23E-04 |
| ↳ <a href="#">membrane</a>                               | <a href="#">3585</a>  | <a href="#">37</a>  | 60.86  | .61   | - | 6.46E-04 | 9.33E-03 |
| ↳ <a href="#">intrinsic component of plasma membrane</a> | <a href="#">777</a>   | <a href="#">1</a>   | 13.19  | .08   | - | 4.46E-05 | 7.48E-04 |
| ↳ <a href="#">plasma membrane part</a>                   | <a href="#">1622</a>  | <a href="#">9</a>   | 27.54  | .33   | - | 5.04E-05 | 7.71E-04 |

**PANTHER 15.0 released!**

Analysis Summary: Please report in publication [s](#)SWAT-MSC secretome from HFD mice

**Analysis Type:** PANTHER Overrepresentation Test (Released 20190711)

---

**Annotation Version and Release Date:** PANTHER version 15 Released 2020-02-14

---

**Analyzed List:** Client Text Box Input (Mus musculus) [Change](#)

---

**Reference List:** Mus musculus (all genes in database) [Change](#)

---

**Annotation Data Set:** PANTHER GO-Slim Cellular Component [?](#)

---

**Test Type:**  Fisher's Exact  Binomial

---

**Correction:**  Calculate False Discovery Rate  Use the Bonferroni correction for multiple testing [?](#)  No correction

**Results** [?](#)

|                               | Reference list                     | Client Text Box Input          |
|-------------------------------|------------------------------------|--------------------------------|
| Uniquely Mapped IDs:          | <a href="#">22265</a> out of 22265 | <a href="#">506</a> out of 505 |
| Unmapped IDs:                 | <a href="#">0</a>                  | <a href="#">4</a>              |
| Multiple mapping information: | <a href="#">0</a>                  | <a href="#">8</a>              |

Export [Table](#) [XML with user input ids](#) [JSON with user input ids](#) View: -- Please select a chart to display --

Displaying only results for FDR P < 0.05, [click here to display all results](#)

|                                                                | Mus musculus (REF)   | Client Text Box Input (Hierarchy NEW! <a href="#">?</a> ) |          |                 |     |             |          |
|----------------------------------------------------------------|----------------------|-----------------------------------------------------------|----------|-----------------|-----|-------------|----------|
|                                                                | #                    | #                                                         | expected | Fold Enrichment | +/- | raw P value | FDR      |
| <a href="#">PANTHER GO-Slim Cellular Component</a>             |                      |                                                           |          |                 |     |             |          |
| <a href="#">proteasome core complex, alpha-subunit complex</a> | <a href="#">8</a>    | <a href="#">7</a>                                         | .18      | 38.58           | +   | 1.40E-08    | 5.19E-07 |
| ↳ <a href="#">proteasome complex</a>                           | <a href="#">39</a>   | <a href="#">15</a>                                        | .88      | 16.96           | +   | 4.92E-13    | 3.20E-11 |
| ↳ <a href="#">endopeptidase complex</a>                        | <a href="#">39</a>   | <a href="#">15</a>                                        | .88      | 16.96           | +   | 4.92E-13    | 3.65E-11 |
| ↳ <a href="#">peptidase complex</a>                            | <a href="#">55</a>   | <a href="#">15</a>                                        | 1.25     | 12.02           | +   | 2.96E-11    | 1.54E-09 |
| ↳ <a href="#">intracellular part</a>                           | <a href="#">6691</a> | <a href="#">185</a>                                       | 151.76   | 1.22            | +   | 1.69E-03    | 1.80E-02 |
| ↳ <a href="#">intracellular</a>                                | <a href="#">6721</a> | <a href="#">186</a>                                       | 152.44   | 1.22            | +   | 1.70E-03    | 1.77E-02 |
| <a href="#">Arp2/3 protein complex</a>                         | <a href="#">9</a>    | <a href="#">5</a>                                         | .20      | 24.49           | +   | 8.93E-06    | 1.86E-04 |
| ↳ <a href="#">cytoskeletal part</a>                            | <a href="#">486</a>  | <a href="#">29</a>                                        | 11.02    | 2.63            | +   | 5.04E-06    | 1.19E-04 |
| ↳ <a href="#">cytoskeleton</a>                                 | <a href="#">586</a>  | <a href="#">30</a>                                        | 13.29    | 2.26            | +   | 6.75E-05    | 9.48E-04 |
| ↳ <a href="#">intracellular non-membrane-bounded organelle</a> | <a href="#">1344</a> | <a href="#">48</a>                                        | 30.48    | 1.57            | +   | 2.50E-03    | 2.45E-02 |
| ↳ <a href="#">non-membrane-bounded organelle</a>               | <a href="#">1344</a> | <a href="#">48</a>                                        | 30.48    | 1.57            | +   | 2.50E-03    | 2.40E-02 |
| ↳ <a href="#">actin cytoskeleton</a>                           | <a href="#">160</a>  | <a href="#">23</a>                                        | 3.63     | 6.34            | +   | 2.05E-11    | 1.18E-09 |
| <a href="#">collagen trimer</a>                                | <a href="#">17</a>   | <a href="#">6</a>                                         | .39      | 15.56           | +   | 8.46E-06    | 1.83E-04 |
| <a href="#">actin cortical patch</a>                           | <a href="#">15</a>   | <a href="#">5</a>                                         | .34      | 14.70           | +   | 6.19E-05    | 8.94E-04 |
| ↳ <a href="#">cortical actin cytoskeleton</a>                  | <a href="#">38</a>   | <a href="#">8</a>                                         | .86      | 9.28            | +   | 6.89E-06    | 1.56E-04 |
| ↳ <a href="#">cortical cytoskeleton</a>                        |                      |                                                           |          |                 |     |             |          |

|                                                            |                       |                     |        |       |   |          |          |
|------------------------------------------------------------|-----------------------|---------------------|--------|-------|---|----------|----------|
|                                                            | <a href="#">42</a>    | <a href="#">8</a>   | .95    | 8.40  | + | 1.31E-05 | 2.44E-04 |
| ↳ <a href="#">cell cortex part</a>                         | <a href="#">91</a>    | <a href="#">9</a>   | 2.06   | 4.36  | + | 3.85E-04 | 4.66E-03 |
| ↳ <a href="#">cell cortex</a>                              | <a href="#">121</a>   | <a href="#">10</a>  | 2.74   | 3.64  | + | 6.94E-04 | 8.02E-03 |
| ↳ <a href="#">cytoplasmic part</a>                         | <a href="#">2902</a>  | <a href="#">110</a> | 65.82  | 1.67  | + | 8.46E-08 | 2.75E-06 |
| ↳ <a href="#">cytoplasm</a>                                | <a href="#">4183</a>  | <a href="#">170</a> | 94.88  | 1.79  | + | 4.78E-15 | 4.97E-13 |
| <a href="#">chaperonin-containing T-complex</a>            | <a href="#">10</a>    | <a href="#">3</a>   | .23    | 13.23 | + | 2.63E-03 | 2.48E-02 |
| ↳ <a href="#">cytosolic part</a>                           | <a href="#">162</a>   | <a href="#">18</a>  | 3.67   | 4.90  | + | 1.16E-07 | 3.18E-06 |
| ↳ <a href="#">cytosol</a>                                  | <a href="#">753</a>   | <a href="#">50</a>  | 17.08  | 2.93  | + | 5.47E-11 | 2.59E-09 |
| <a href="#">basement membrane</a>                          | <a href="#">27</a>    | <a href="#">6</a>   | .61    | 9.80  | + | 7.69E-05 | 1.05E-03 |
| ↳ <a href="#">collagen-containing extracellular matrix</a> | <a href="#">66</a>    | <a href="#">20</a>  | 1.50   | 13.36 | + | 2.70E-15 | 3.51E-13 |
| ↳ <a href="#">extracellular matrix</a>                     | <a href="#">177</a>   | <a href="#">34</a>  | 4.01   | 8.47  | + | 1.11E-19 | 1.93E-17 |
| ↳ <a href="#">extracellular region part</a>                | <a href="#">1253</a>  | <a href="#">98</a>  | 28.42  | 3.45  | + | 7.16E-26 | 1.86E-23 |
| ↳ <a href="#">extracellular region</a>                     | <a href="#">1253</a>  | <a href="#">98</a>  | 28.42  | 3.45  | + | 7.16E-26 | 3.72E-23 |
| <a href="#">actomyosin</a>                                 | <a href="#">18</a>    | <a href="#">4</a>   | .41    | 9.80  | + | 1.27E-03 | 1.38E-02 |
| <a href="#">actin filament</a>                             | <a href="#">70</a>    | <a href="#">13</a>  | 1.59   | 8.19  | + | 3.46E-08 | 1.20E-06 |
| ↳ <a href="#">polymeric cytoskeletal fiber</a>             | <a href="#">246</a>   | <a href="#">18</a>  | 5.58   | 3.23  | + | 2.76E-05 | 4.34E-04 |
| ↳ <a href="#">supramolecular fiber</a>                     | <a href="#">298</a>   | <a href="#">24</a>  | 6.76   | 3.55  | + | 2.66E-07 | 6.92E-06 |
| ↳ <a href="#">supramolecular polymer</a>                   | <a href="#">301</a>   | <a href="#">25</a>  | 6.83   | 3.66  | + | 8.69E-08 | 2.66E-06 |
| ↳ <a href="#">supramolecular complex</a>                   | <a href="#">301</a>   | <a href="#">25</a>  | 6.83   | 3.66  | + | 8.69E-08 | 2.51E-06 |
| <a href="#">focal adhesion</a>                             | <a href="#">38</a>    | <a href="#">6</a>   | .86    | 6.96  | + | 3.99E-04 | 4.71E-03 |
| ↳ <a href="#">adherens junction</a>                        | <a href="#">93</a>    | <a href="#">8</a>   | 2.11   | 3.79  | + | 1.85E-03 | 1.88E-02 |
| ↳ <a href="#">anchoring junction</a>                       | <a href="#">102</a>   | <a href="#">8</a>   | 2.31   | 3.46  | + | 3.15E-03 | 2.88E-02 |
| ↳ <a href="#">cell junction</a>                            | <a href="#">121</a>   | <a href="#">9</a>   | 2.74   | 3.28  | + | 2.49E-03 | 2.49E-02 |
| <a href="#">cytosolic large ribosomal subunit</a>          | <a href="#">64</a>    | <a href="#">9</a>   | 1.45   | 6.20  | + | 3.33E-05 | 5.09E-04 |
| ↳ <a href="#">cytosolic ribosome</a>                       | <a href="#">104</a>   | <a href="#">14</a>  | 2.36   | 5.94  | + | 3.69E-07 | 9.14E-06 |
| ↳ <a href="#">ribosome</a>                                 | <a href="#">151</a>   | <a href="#">14</a>  | 3.42   | 4.09  | + | 1.98E-05 | 3.43E-04 |
| ↳ <a href="#">large ribosomal subunit</a>                  | <a href="#">86</a>    | <a href="#">9</a>   | 1.95   | 4.61  | + | 2.62E-04 | 3.25E-03 |
| ↳ <a href="#">ribosomal subunit</a>                        | <a href="#">143</a>   | <a href="#">14</a>  | 3.24   | 4.32  | + | 1.12E-05 | 2.17E-04 |
| <a href="#">cytosolic small ribosomal subunit</a>          | <a href="#">40</a>    | <a href="#">5</a>   | .91    | 5.51  | + | 3.09E-03 | 2.87E-02 |
| <a href="#">extracellular space</a>                        | <a href="#">1169</a>  | <a href="#">74</a>  | 26.51  | 2.79  | + | 7.64E-15 | 6.63E-13 |
| Unclassified                                               | <a href="#">12713</a> | <a href="#">223</a> | 288.35 | .77   | - | 8.83E-09 | 3.83E-07 |
| <a href="#">nuclear lumen</a>                              | <a href="#">868</a>   | <a href="#">5</a>   | 19.69  | .25   | - | 1.49E-04 | 1.98E-03 |
| ↳ <a href="#">nuclear part</a>                             | <a href="#">1243</a>  | <a href="#">8</a>   | 28.19  | .28   | - | 1.10E-05 | 2.20E-04 |
| ↳ <a href="#">intracellular organelle lumen</a>            | <a href="#">951</a>   | <a href="#">9</a>   | 21.57  | .42   | - | 3.40E-03 | 3.00E-02 |
| ↳ <a href="#">organelle lumen</a>                          | <a href="#">951</a>   | <a href="#">9</a>   | 21.57  | .42   | - | 3.40E-03 | 2.95E-02 |
| ↳ <a href="#">membrane-enclosed lumen</a>                  | <a href="#">951</a>   | <a href="#">9</a>   | 21.57  | .42   | - | 3.40E-03 | 3.05E-02 |
| <a href="#">integral component of plasma membrane</a>      | <a href="#">770</a>   | <a href="#">4</a>   | 17.46  | .23   | - | 2.54E-04 | 3.22E-03 |
| ↳ <a href="#">integral component of membrane</a>           | <a href="#">1114</a>  | <a href="#">7</a>   | 25.27  | .28   | - | 2.65E-05 | 4.30E-04 |
| ↳ <a href="#">intrinsic component of membrane</a>          | <a href="#">1141</a>  | <a href="#">7</a>   | 25.88  | .27   | - | 1.93E-05 | 3.46E-04 |
| ↳ <a href="#">membrane part</a>                            | <a href="#">2301</a>  | <a href="#">25</a>  | 52.19  | .48   | - | 2.08E-05 | 3.48E-04 |
| ↳ <a href="#">membrane</a>                                 | <a href="#">3585</a>  | <a href="#">55</a>  | 81.31  | .68   | - | 1.12E-03 | 1.23E-02 |
| ↳ <a href="#">intrinsic component of plasma membrane</a>   | <a href="#">777</a>   | <a href="#">4</a>   | 17.62  | .23   | - | 1.78E-04 | 2.32E-03 |
| ↳ <a href="#">plasma membrane part</a>                     | <a href="#">1622</a>  | <a href="#">15</a>  | 36.79  | .41   | - | 5.38E-05 | 8.00E-04 |
| <a href="#">transferase complex</a>                        | <a href="#">444</a>   | <a href="#">1</a>   | 10.07  | .10   | - | 9.06E-04 | 1.02E-02 |



**PANTHER 15.0 released!**

**Analysis Summary:** Please report in publication [?](#) **BM-MSC secretome from HFD mice**

**Analysis Type:** PANTHER Overrepresentation Test (Released 20190711)

---

**Annotation Version and Release Date:** PANTHER version 15 Released 2020-02-14

---

**Analyzed List:** Client Text Box Input (Mus musculus) [Change](#)

---

**Reference List:** Mus musculus (all genes in database) [Change](#)

---

**Annotation Data Set:** PANTHER GO-Slim Cellular Component [?](#)

---

**Test Type:**  Fisher's Exact  Binomial

---

**Correction:**  Calculate False Discovery Rate  Use the Bonferroni correction for multiple testing [?](#)  No correction

**Results** [?](#)

|                               | Reference list                     | Client Text Box Input          |
|-------------------------------|------------------------------------|--------------------------------|
| Uniquely Mapped IDs:          | <a href="#">22265</a> out of 22265 | <a href="#">438</a> out of 438 |
| Unmapped IDs:                 | <a href="#">0</a>                  | <a href="#">3</a>              |
| Multiple mapping information: | <a href="#">0</a>                  | <a href="#">9</a>              |

Export [Table](#) [XML with user input ids](#) [JSON with user input ids](#) View: -- Please select a chart to display --

Displaying only results for FDR P < 0.05, [click here to display all results](#)

|                                                                | <a href="#">Mus musculus</a> (REF) | <a href="#">Client Text Box Input</a> ( <a href="#">Hierarchy</a> <b>NEW!</b> <a href="#">?</a> ) |                          |                                 |                     |                             |                     |
|----------------------------------------------------------------|------------------------------------|---------------------------------------------------------------------------------------------------|--------------------------|---------------------------------|---------------------|-----------------------------|---------------------|
| <a href="#">PANTHER GO-Slim Cellular Component</a>             | #                                  | #                                                                                                 | <a href="#">expected</a> | <a href="#">Fold Enrichment</a> | <a href="#">+/-</a> | <a href="#">raw P value</a> | <a href="#">FDR</a> |
| <a href="#">proteasome core complex, alpha-subunit complex</a> | <a href="#">8</a>                  | <a href="#">7</a>                                                                                 | .16                      | 44.48                           | +                   | 5.34E-09                    | 4.63E-07            |
| ↳ <a href="#">proteasome complex</a>                           | <a href="#">39</a>                 | <a href="#">10</a>                                                                                | .77                      | 13.03                           | +                   | 2.71E-08                    | 1.56E-06            |
| ↳ <a href="#">endopeptidase complex</a>                        | <a href="#">39</a>                 | <a href="#">10</a>                                                                                | .77                      | 13.03                           | +                   | 2.71E-08                    | 1.76E-06            |
| ↳ <a href="#">peptidase complex</a>                            | <a href="#">55</a>                 | <a href="#">10</a>                                                                                | 1.08                     | 9.24                            | +                   | 4.48E-07                    | 1.79E-05            |
| <a href="#">Arp2/3 protein complex</a>                         | <a href="#">9</a>                  | <a href="#">5</a>                                                                                 | .18                      | 28.24                           | +                   | 4.53E-06                    | 1.24E-04            |
| ↳ <a href="#">cytoskeletal part</a>                            | <a href="#">486</a>                | <a href="#">20</a>                                                                                | 9.56                     | 2.09                            | +                   | 2.64E-03                    | 3.27E-02            |
| ↳ <a href="#">actin cytoskeleton</a>                           | <a href="#">160</a>                | <a href="#">18</a>                                                                                | 3.15                     | 5.72                            | +                   | 1.18E-08                    | 8.79E-07            |
| <a href="#">collagen trimer</a>                                | <a href="#">17</a>                 | <a href="#">7</a>                                                                                 | .33                      | 20.93                           | +                   | 2.47E-07                    | 1.17E-05            |
| <a href="#">basement membrane</a>                              | <a href="#">27</a>                 | <a href="#">6</a>                                                                                 | .53                      | 11.30                           | +                   | 3.55E-05                    | 6.83E-04            |
| ↳ <a href="#">collagen-containing extracellular matrix</a>     | <a href="#">66</a>                 | <a href="#">22</a>                                                                                | 1.30                     | 16.94                           | +                   | 1.06E-18                    | 1.10E-16            |
| ↳ <a href="#">extracellular matrix</a>                         | <a href="#">177</a>                | <a href="#">35</a>                                                                                | 3.48                     | 10.05                           | +                   | 1.47E-22                    | 1.91E-20            |
| ↳ <a href="#">extracellular region part</a>                    | <a href="#">1253</a>               | <a href="#">107</a>                                                                               | 24.65                    | 4.34                            | +                   | 4.63E-37                    | 1.20E-34            |
| ↳ <a href="#">extracellular region</a>                         | <a href="#">1253</a>               | <a href="#">107</a>                                                                               | 24.65                    | 4.34                            | +                   | 4.63E-37                    | 2.41E-34            |
| <a href="#">actin filament</a>                                 | <a href="#">70</a>                 | <a href="#">11</a>                                                                                | 1.38                     | 7.99                            | +                   | 4.38E-07                    | 1.90E-05            |

|                                           |                       |                     |        |      |   |          |          |
|-------------------------------------------|-----------------------|---------------------|--------|------|---|----------|----------|
| ↳polymeric cytoskeletal fiber             | <a href="#">246</a>   | <a href="#">13</a>  | 4.84   | 2.69 | + | 1.66E-03 | 2.16E-02 |
| ↳supramolecular fiber                     | <a href="#">298</a>   | <a href="#">18</a>  | 5.86   | 3.07 | + | 4.74E-05 | 8.81E-04 |
| ↳supramolecular polymer                   | <a href="#">301</a>   | <a href="#">19</a>  | 5.92   | 3.21 | + | 1.66E-05 | 3.92E-04 |
| ↳supramolecular complex                   | <a href="#">301</a>   | <a href="#">19</a>  | 5.92   | 3.21 | + | 1.66E-05 | 3.75E-04 |
| cortical actin cytoskeleton               | <a href="#">38</a>    | <a href="#">5</a>   | .75    | 6.69 | + | 1.38E-03 | 1.83E-02 |
| ↳cortical cytoskeleton                    | <a href="#">42</a>    | <a href="#">5</a>   | .83    | 6.05 | + | 2.06E-03 | 2.61E-02 |
| ↳cytoplasm                                | <a href="#">4183</a>  | <a href="#">118</a> | 82.29  | 1.43 | + | 3.47E-05 | 6.94E-04 |
| lysosome                                  | <a href="#">114</a>   | <a href="#">11</a>  | 2.24   | 4.90 | + | 3.14E-05 | 6.80E-04 |
| ↳lytic vacuole                            | <a href="#">115</a>   | <a href="#">11</a>  | 2.26   | 4.86 | + | 3.38E-05 | 7.03E-04 |
| ↳intracellular membrane-bounded organelle | <a href="#">4662</a>  | <a href="#">60</a>  | 91.71  | .65  | - | 1.35E-04 | 2.35E-03 |
| ↳membrane-bounded organelle               | <a href="#">4721</a>  | <a href="#">62</a>  | 92.87  | .67  | - | 2.34E-04 | 3.80E-03 |
| extracellular space                       | <a href="#">1169</a>  | <a href="#">85</a>  | 23.00  | 3.70 | + | 1.22E-24 | 2.11E-22 |
| cytosol                                   | <a href="#">753</a>   | <a href="#">36</a>  | 14.81  | 2.43 | + | 2.01E-06 | 7.47E-05 |
| Unclassified                              | <a href="#">12713</a> | <a href="#">201</a> | 250.09 | .80  | - | 3.42E-06 | 1.11E-04 |
| nuclear lumen                             | <a href="#">868</a>   | <a href="#">4</a>   | 17.08  | .23  | - | 3.53E-04 | 5.41E-03 |
| ↳nuclear part                             | <a href="#">1243</a>  | <a href="#">5</a>   | 24.45  | .20  | - | 3.57E-06 | 1.09E-04 |
| ↳nucleus                                  | <a href="#">2974</a>  | <a href="#">29</a>  | 58.50  | .50  | - | 1.21E-05 | 3.01E-04 |
| ↳intracellular organelle lumen            | <a href="#">951</a>   | <a href="#">6</a>   | 18.71  | .32  | - | 1.07E-03 | 1.50E-02 |
| ↳organelle lumen                          | <a href="#">951</a>   | <a href="#">6</a>   | 18.71  | .32  | - | 1.07E-03 | 1.46E-02 |
| ↳membrane-enclosed lumen                  | <a href="#">951</a>   | <a href="#">6</a>   | 18.71  | .32  | - | 1.07E-03 | 1.54E-02 |
| integral component of plasma membrane     | <a href="#">770</a>   | <a href="#">3</a>   | 15.15  | .20  | - | 4.24E-04 | 6.30E-03 |
| ↳integral component of membrane           | <a href="#">1114</a>  | <a href="#">4</a>   | 21.91  | .18  | - | 5.57E-06 | 1.45E-04 |
| ↳intrinsic component of membrane          | <a href="#">1141</a>  | <a href="#">4</a>   | 22.45  | .18  | - | 4.01E-06 | 1.16E-04 |
| ↳membrane part                            | <a href="#">2301</a>  | <a href="#">15</a>  | 45.27  | .33  | - | 1.53E-07 | 7.95E-06 |
| ↳membrane                                 | <a href="#">3585</a>  | <a href="#">43</a>  | 70.52  | .61  | - | 2.15E-04 | 3.61E-03 |
| ↳intrinsic component of plasma membrane   | <a href="#">777</a>   | <a href="#">3</a>   | 15.29  | .20  | - | 2.85E-04 | 4.49E-03 |
| ↳plasma membrane part                     | <a href="#">1622</a>  | <a href="#">12</a>  | 31.91  | .38  | - | 7.48E-05 | 1.34E-03 |
| ↳plasma membrane                          | <a href="#">3243</a>  | <a href="#">43</a>  | 63.80  | .67  | - | 3.95E-03 | 4.56E-02 |
| cytoplasmic vesicle                       | <a href="#">448</a>   | <a href="#">1</a>   | 8.81   | .11  | - | 2.72E-03 | 3.21E-02 |
| ↳intracellular vesicle                    | <a href="#">448</a>   | <a href="#">1</a>   | 8.81   | .11  | - | 2.72E-03 | 3.28E-02 |

**PANTHER 15.0 released!**

Analysis Summary: Please report in publication [vWAT-MSC secretome from HFD mice](#)

**Analysis Type:** PANTHER Overrepresentation Test (Released 20190711)

---

**Annotation Version and Release Date:** PANTHER version 15 Released 2020-02-14

---

**Analyzed List:** Client Text Box Input (Mus musculus) [Change](#)

---

**Reference List:** Mus musculus (all genes in database) [Change](#)

---

**Annotation Data Set:** PANTHER Protein Class ?

---

**Test Type:**  Fisher's Exact  Binomial

---

**Correction:**  Calculate False Discovery Rate  Use the Bonferroni correction for multiple testing ?  No correction

Results ?

|                               | Reference list                     | Client Text Box Input          |
|-------------------------------|------------------------------------|--------------------------------|
| Uniquely Mapped IDs:          | <a href="#">22265</a> out of 22265 | <a href="#">377</a> out of 378 |
| Unmapped IDs:                 | <a href="#">0</a>                  | <a href="#">3</a>              |
| Multiple mapping information: | <a href="#">0</a>                  | <a href="#">10</a>             |

Export Table XML with user input ids JSON with user input ids View: -- Please select a chart to display --

Displaying only results for FDR P < 0.05, [click here to display all results](#)

| PANTHER Protein Class                                         | Mus musculus (REF)  | Client Text Box Input (Hierarchy NEW! ?) | #                  | expected | Fold Enrichment | +/- | raw P value | FDR      |
|---------------------------------------------------------------|---------------------|------------------------------------------|--------------------|----------|-----------------|-----|-------------|----------|
| <a href="#">Hsp90 family chaperone</a>                        | <a href="#">4</a>   | <a href="#">3</a>                        | <a href="#">3</a>  | .07      | 44.18           | +   | 1.54E-04    | 1.87E-03 |
| ↳ <a href="#">chaperone</a>                                   | <a href="#">74</a>  | <a href="#">7</a>                        | <a href="#">7</a>  | 1.26     | 5.57            | +   | 4.12E-04    | 4.01E-03 |
| <a href="#">extracellular matrix structural protein</a>       | <a href="#">73</a>  | <a href="#">16</a>                       | <a href="#">16</a> | 1.24     | 12.91           | +   | 1.55E-12    | 6.03E-11 |
| ↳ <a href="#">extracellular matrix protein</a>                | <a href="#">161</a> | <a href="#">22</a>                       | <a href="#">22</a> | 2.73     | 8.05            | +   | 5.26E-13    | 2.56E-11 |
| <a href="#">translation elongation factor</a>                 | <a href="#">15</a>  | <a href="#">3</a>                        | <a href="#">3</a>  | .25      | 11.78           | +   | 3.13E-03    | 2.10E-02 |
| ↳ <a href="#">translational protein</a>                       | <a href="#">288</a> | <a href="#">16</a>                       | <a href="#">16</a> | 4.89     | 3.27            | +   | 5.79E-05    | 8.06E-04 |
| <a href="#">non-motor actin binding protein</a>               | <a href="#">93</a>  | <a href="#">18</a>                       | <a href="#">18</a> | 1.58     | 11.40           | +   | 3.92E-13    | 2.55E-11 |
| ↳ <a href="#">actin or actin-binding cytoskeletal protein</a> | <a href="#">236</a> | <a href="#">35</a>                       | <a href="#">35</a> | 4.01     | 8.74            | +   | 5.13E-21    | 1.00E-18 |
| ↳ <a href="#">cytoskeletal protein</a>                        | <a href="#">492</a> | <a href="#">38</a>                       | <a href="#">38</a> | 8.35     | 4.55            | +   | 4.67E-14    | 4.55E-12 |
| <a href="#">actin binding motor protein</a>                   | <a href="#">27</a>  | <a href="#">4</a>                        | <a href="#">4</a>  | .46      | 8.73            | +   | 1.68E-03    | 1.37E-02 |
| <a href="#">actin and actin related protein</a>               | <a href="#">30</a>  | <a href="#">4</a>                        | <a href="#">4</a>  | .51      | 7.85            | +   | 2.39E-03    | 1.72E-02 |
| <a href="#">calmodulin-related</a>                            | <a href="#">62</a>  | <a href="#">8</a>                        | <a href="#">8</a>  | 1.05     | 7.60            | +   | 2.14E-05    | 3.22E-04 |
| ↳ <a href="#">calcium-binding protein</a>                     | <a href="#">79</a>  | <a href="#">13</a>                       | <a href="#">13</a> | 1.34     | 9.69            | +   | 4.33E-09    | 1.05E-07 |

|                                                           |                       |                     |        |        |   |          |          |
|-----------------------------------------------------------|-----------------------|---------------------|--------|--------|---|----------|----------|
| <a href="#">protease inhibitor</a>                        | <a href="#">157</a>   | <a href="#">17</a>  | 2.67   | 6.38   | + | 6.03E-09 | 1.31E-07 |
| ↳ <a href="#">protein-binding activity modulator</a>      | <a href="#">632</a>   | <a href="#">22</a>  | 10.73  | 2.05   | + | 1.76E-03 | 1.37E-02 |
| <a href="#">reductase</a>                                 | <a href="#">51</a>    | <a href="#">5</a>   | .87    | 5.77   | + | 2.40E-03 | 1.67E-02 |
| ↳ <a href="#">oxidoreductase</a>                          | <a href="#">418</a>   | <a href="#">23</a>  | 7.10   | 3.24   | + | 1.68E-06 | 3.28E-05 |
| ↳ <a href="#">metabolite interconversion enzyme</a>       | <a href="#">1428</a>  | <a href="#">43</a>  | 24.24  | 1.77   | + | 3.17E-04 | 3.25E-03 |
| <a href="#">ribosomal protein</a>                         | <a href="#">159</a>   | <a href="#">11</a>  | 2.70   | 4.07   | + | 1.41E-04 | 1.83E-03 |
| <a href="#">dehydrogenase</a>                             | <a href="#">119</a>   | <a href="#">7</a>   | 2.02   | 3.46   | + | 5.29E-03 | 3.33E-02 |
| <a href="#">protease</a>                                  | <a href="#">597</a>   | <a href="#">22</a>  | 10.14  | 2.17   | + | 1.09E-03 | 9.67E-03 |
| Unclassified                                              | <a href="#">12347</a> | <a href="#">144</a> | 209.62 | .69    | - | 2.30E-11 | 7.49E-10 |
| <a href="#">immunoglobulin</a>                            | <a href="#">389</a>   | <a href="#">0</a>   | 6.60   | < 0.01 | - | 2.26E-03 | 1.70E-02 |
| ↳ <a href="#">defense/immunity protein</a>                | <a href="#">600</a>   | <a href="#">2</a>   | 10.19  | .20    | - | 5.23E-03 | 3.40E-02 |
| <a href="#">C2H2 zinc finger transcription factor</a>     | <a href="#">424</a>   | <a href="#">0</a>   | 7.20   | < 0.01 | - | 1.59E-03 | 1.35E-02 |
| ↳ <a href="#">zinc finger transcription factor</a>        | <a href="#">502</a>   | <a href="#">0</a>   | 8.52   | < 0.01 | - | 3.15E-04 | 3.41E-03 |
| ↳ <a href="#">DNA-binding transcription factor</a>        | <a href="#">970</a>   | <a href="#">1</a>   | 16.47  | .06    | - | 2.12E-06 | 3.75E-05 |
| ↳ <a href="#">gene-specific transcriptional regulator</a> | <a href="#">1054</a>  | <a href="#">2</a>   | 17.89  | .11    | - | 5.64E-06 | 9.17E-05 |
| <a href="#">G-protein coupled receptor</a>                | <a href="#">568</a>   | <a href="#">0</a>   | 9.64   | < 0.01 | - | 1.56E-04 | 1.79E-03 |
| ↳ <a href="#">transmembrane signal receptor</a>           | <a href="#">712</a>   | <a href="#">2</a>   | 12.09  | .17    | - | 8.92E-04 | 8.29E-03 |



**PANTHER 15.0 released!**

**Analysis Summary:** Please report in publication <sup>?</sup> **sWAT-MSC secretome from HFD mice**

**Analysis Type:** PANTHER Overrepresentation Test (Released 20190711)

---

**Annotation Version and Release Date:** PANTHER version 15 Released 2020-02-14

---

**Analyzed List:** Client Text Box Input (Mus musculus) [Change](#)

---

**Reference List:** Mus musculus (all genes in database) [Change](#)

---

**Annotation Data Set:** PANTHER Protein Class <sup>?</sup>

---

**Test Type:**  Fisher's Exact  Binomial

---

**Correction:**  Calculate False Discovery Rate  Use the Bonferroni correction for multiple testing <sup>?</sup>  No correction

**Results** <sup>?</sup>

|                               | Reference list                     | Client Text Box Input          |
|-------------------------------|------------------------------------|--------------------------------|
| Uniquely Mapped IDs:          | <a href="#">22265</a> out of 22265 | <a href="#">506</a> out of 505 |
| Unmapped IDs:                 | <a href="#">0</a>                  | <a href="#">4</a>              |
| Multiple mapping information: | <a href="#">0</a>                  | <a href="#">8</a>              |

Export [Table](#) [XML with user input ids](#) [JSON with user input ids](#) View: -- Please select a chart to display --

Displaying only results for FDR P < 0.05, [click here to display all results](#)

| PANTHER Protein Class                                         | Mus musculus (REF)  | Client Text Box Input (Hierarchy NEW! <sup>?</sup> ) | #  | expected | Fold Enrichment | +/- | raw P value | FDR      |
|---------------------------------------------------------------|---------------------|------------------------------------------------------|----|----------|-----------------|-----|-------------|----------|
| <a href="#">Hsp90 family chaperone</a>                        | <a href="#">4</a>   | <a href="#">3</a>                                    | 3  | .09      | 33.07           | +   | 3.55E-04    | 2.47E-03 |
| ↳ <a href="#">chaperone</a>                                   | <a href="#">74</a>  | <a href="#">13</a>                                   | 13 | 1.68     | 7.75            | +   | 6.18E-08    | 1.00E-06 |
| <a href="#">chaperonin</a>                                    | <a href="#">13</a>  | <a href="#">5</a>                                    | 5  | .29      | 16.96           | +   | 3.55E-05    | 3.30E-04 |
| <a href="#">extracellular matrix structural protein</a>       | <a href="#">73</a>  | <a href="#">16</a>                                   | 16 | 1.66     | 9.66            | +   | 1.08E-10    | 3.00E-09 |
| ↳ <a href="#">extracellular matrix protein</a>                | <a href="#">161</a> | <a href="#">27</a>                                   | 27 | 3.65     | 7.39            | +   | 1.32E-14    | 6.42E-13 |
| <a href="#">calmodulin-related</a>                            | <a href="#">62</a>  | <a href="#">12</a>                                   | 12 | 1.41     | 8.53            | +   | 7.84E-08    | 1.18E-06 |
| ↳ <a href="#">calcium-binding protein</a>                     | <a href="#">79</a>  | <a href="#">18</a>                                   | 18 | 1.79     | 10.05           | +   | 4.16E-12    | 1.35E-10 |
| <a href="#">non-motor actin binding protein</a>               | <a href="#">93</a>  | <a href="#">17</a>                                   | 17 | 2.11     | 8.06            | +   | 3.36E-10    | 8.19E-09 |
| ↳ <a href="#">actin or actin-binding cytoskeletal protein</a> | <a href="#">236</a> | <a href="#">37</a>                                   | 37 | 5.35     | 6.91            | +   | 1.08E-18    | 2.10E-16 |
| ↳ <a href="#">cytoskeletal protein</a>                        | <a href="#">492</a> | <a href="#">42</a>                                   | 42 | 11.16    | 3.76            | +   | 1.40E-12    | 5.47E-11 |
| <a href="#">actin and actin related protein</a>               | <a href="#">30</a>  | <a href="#">5</a>                                    | 5  | .68      | 7.35            | +   | 9.86E-04    | 6.20E-03 |
| <a href="#">actin binding motor protein</a>                   | <a href="#">27</a>  | <a href="#">4</a>                                    | 4  | .61      | 6.53            | +   | 4.68E-03    | 2.47E-02 |
| <a href="#">aminoacyl-tRNA synthetase</a>                     | <a href="#">34</a>  | <a href="#">5</a>                                    | 5  | .77      | 6.48            | +   | 1.63E-03    | 8.81E-03 |

|                                                           |                       |                     |        |        |   |          |          |
|-----------------------------------------------------------|-----------------------|---------------------|--------|--------|---|----------|----------|
| ↳ <a href="#">translational protein</a>                   | <a href="#">288</a>   | <a href="#">21</a>  | 6.53   | 3.21   | + | 6.33E-06 | 8.23E-05 |
| <a href="#">protease inhibitor</a>                        | <a href="#">157</a>   | <a href="#">20</a>  | 3.56   | 5.62   | + | 2.81E-09 | 6.08E-08 |
| ↳ <a href="#">protein-binding activity modulator</a>      | <a href="#">632</a>   | <a href="#">33</a>  | 14.33  | 2.30   | + | 2.04E-05 | 1.99E-04 |
| <a href="#">reductase</a>                                 | <a href="#">51</a>    | <a href="#">6</a>   | 1.16   | 5.19   | + | 1.61E-03 | 8.97E-03 |
| ↳ <a href="#">oxidoreductase</a>                          | <a href="#">418</a>   | <a href="#">26</a>  | 9.48   | 2.74   | + | 7.83E-06 | 9.54E-05 |
| ↳ <a href="#">metabolite interconversion enzyme</a>       | <a href="#">1428</a>  | <a href="#">59</a>  | 32.39  | 1.82   | + | 1.49E-05 | 1.62E-04 |
| <a href="#">growth factor</a>                             | <a href="#">90</a>    | <a href="#">10</a>  | 2.04   | 4.90   | + | 7.66E-05 | 6.49E-04 |
| ↳ <a href="#">intercellular signal molecule</a>           | <a href="#">343</a>   | <a href="#">21</a>  | 7.78   | 2.70   | + | 7.16E-05 | 6.34E-04 |
| <a href="#">metalloprotease</a>                           | <a href="#">167</a>   | <a href="#">13</a>  | 3.79   | 3.43   | + | 2.00E-04 | 1.56E-03 |
| ↳ <a href="#">protease</a>                                | <a href="#">597</a>   | <a href="#">32</a>  | 13.54  | 2.36   | + | 1.38E-05 | 1.58E-04 |
| <a href="#">ribosomal protein</a>                         | <a href="#">159</a>   | <a href="#">11</a>  | 3.61   | 3.05   | + | 1.50E-03 | 8.58E-03 |
| <a href="#">cysteine protease</a>                         | <a href="#">136</a>   | <a href="#">9</a>   | 3.08   | 2.92   | + | 5.14E-03 | 2.64E-02 |
| Unclassified                                              | <a href="#">12347</a> | <a href="#">190</a> | 280.05 | .68    | - | 1.96E-15 | 1.27E-13 |
| <a href="#">transporter</a>                               | <a href="#">687</a>   | <a href="#">4</a>   | 15.58  | .26    | - | 9.31E-04 | 6.05E-03 |
| <a href="#">RNA binding protein</a>                       | <a href="#">615</a>   | <a href="#">3</a>   | 13.95  | .22    | - | 1.18E-03 | 6.99E-03 |
| ↳ <a href="#">nucleic acid binding protein</a>            | <a href="#">858</a>   | <a href="#">5</a>   | 19.46  | .26    | - | 2.10E-04 | 1.58E-03 |
| <a href="#">immunoglobulin</a>                            | <a href="#">389</a>   | <a href="#">0</a>   | 8.82   | < 0.01 | - | 3.31E-04 | 2.39E-03 |
| ↳ <a href="#">defense/immunity protein</a>                | <a href="#">600</a>   | <a href="#">3</a>   | 13.61  | .22    | - | 1.12E-03 | 6.82E-03 |
| <a href="#">C2H2 zinc finger transcription factor</a>     | <a href="#">424</a>   | <a href="#">0</a>   | 9.62   | < 0.01 | - | 1.52E-04 | 1.23E-03 |
| ↳ <a href="#">zinc finger transcription factor</a>        | <a href="#">502</a>   | <a href="#">0</a>   | 11.39  | < 0.01 | - | 2.01E-05 | 2.06E-04 |
| ↳ <a href="#">DNA-binding transcription factor</a>        | <a href="#">970</a>   | <a href="#">1</a>   | 22.00  | .05    | - | 9.59E-09 | 1.87E-07 |
| ↳ <a href="#">gene-specific transcriptional regulator</a> | <a href="#">1054</a>  | <a href="#">2</a>   | 23.91  | .08    | - | 2.06E-08 | 3.66E-07 |
| <a href="#">G-protein coupled receptor</a>                | <a href="#">568</a>   | <a href="#">0</a>   | 12.88  | < 0.01 | - | 4.11E-06 | 5.72E-05 |
| ↳ <a href="#">transmembrane signal receptor</a>           | <a href="#">712</a>   | <a href="#">4</a>   | 16.15  | .25    | - | 6.78E-04 | 4.56E-03 |

[PANTHER 15.0 released!](#)

Analysis Summary: Please report in publication [BM-MSC secretome from HFD mice](#)

**Analysis Type:** PANTHER Overrepresentation Test (Released 20190711)

---

**Annotation Version and Release Date:** PANTHER version 15 Released 2020-02-14

---

**Analyzed List:** Client Text Box Input (Mus musculus) [Change](#)

---

**Reference List:** Mus musculus (all genes in database) [Change](#)

---

**Annotation Data Set:** PANTHER Protein Class ?

---

**Test Type:**  Fisher's Exact  Binomial

---

**Correction:**  Calculate False Discovery Rate  Use the Bonferroni correction for multiple testing ?  No correction

Results ?

|                               | Reference list                     | Client Text Box Input          |
|-------------------------------|------------------------------------|--------------------------------|
| Uniquely Mapped IDs:          | <a href="#">22265</a> out of 22265 | <a href="#">438</a> out of 438 |
| Unmapped IDs:                 | <a href="#">0</a>                  | <a href="#">3</a>              |
| Multiple mapping information: | <a href="#">0</a>                  | <a href="#">9</a>              |

Export [Table](#) [XML with user input ids](#) [JSON with user input ids](#) View: -- Please select a chart to display --

Displaying only results for FDR P < 0.05, [click here to display all results](#)

|                                                               | Mus musculus (REF)  | Client Text Box Input (Hierarchy NEW! ?) |          |                 |     |             |          |
|---------------------------------------------------------------|---------------------|------------------------------------------|----------|-----------------|-----|-------------|----------|
| PANTHER Protein Class                                         | #                   | #                                        | expected | Fold Enrichment | +/- | raw P value | FDR      |
| <a href="#">Hsp90 family chaperone</a>                        | <a href="#">4</a>   | <a href="#">3</a>                        | .08      | 38.12           | +   | 2.36E-04    | 2.09E-03 |
| ↳ <a href="#">chaperone</a>                                   | <a href="#">74</a>  | <a href="#">7</a>                        | 1.46     | 4.81            | +   | 9.66E-04    | 6.73E-03 |
| <a href="#">extracellular matrix structural protein</a>       | <a href="#">73</a>  | <a href="#">20</a>                       | 1.44     | 13.93           | +   | 9.68E-16    | 6.29E-14 |
| ↳ <a href="#">extracellular matrix protein</a>                | <a href="#">161</a> | <a href="#">30</a>                       | 3.17     | 9.47            | +   | 7.26E-19    | 1.42E-16 |
| <a href="#">chemokine</a>                                     | <a href="#">15</a>  | <a href="#">4</a>                        | .30      | 13.56           | +   | 4.21E-04    | 3.42E-03 |
| ↳ <a href="#">cytokine</a>                                    | <a href="#">77</a>  | <a href="#">11</a>                       | 1.51     | 7.26            | +   | 1.03E-06    | 1.54E-05 |
| ↳ <a href="#">intercellular signal molecule</a>               | <a href="#">343</a> | <a href="#">22</a>                       | 6.75     | 3.26            | +   | 2.83E-06    | 3.95E-05 |
| <a href="#">actin and actin related protein</a>               | <a href="#">30</a>  | <a href="#">5</a>                        | .59      | 8.47            | +   | 5.26E-04    | 3.95E-03 |
| ↳ <a href="#">actin or actin-binding cytoskeletal protein</a> | <a href="#">236</a> | <a href="#">32</a>                       | 4.64     | 6.89            | +   | 1.91E-16    | 1.86E-14 |
| ↳ <a href="#">cytoskeletal protein</a>                        | <a href="#">492</a> | <a href="#">34</a>                       | 9.68     | 3.51            | +   | 9.07E-10    | 2.21E-08 |
| <a href="#">non-motor actin binding protein</a>               | <a href="#">93</a>  | <a href="#">15</a>                       | 1.83     | 8.20            | +   | 2.56E-09    | 5.55E-08 |
| <a href="#">protease inhibitor</a>                            | <a href="#">157</a> | <a href="#">24</a>                       | 3.09     | 7.77            | +   | 1.17E-13    | 5.70E-12 |
| ↳ <a href="#">protein-binding activity modulator</a>          | <a href="#">632</a> | <a href="#">29</a>                       | 12.43    | 2.33            | +   | 4.08E-05    | 4.42E-04 |

|                                                           |                       |                     |        |        |   |          |          |
|-----------------------------------------------------------|-----------------------|---------------------|--------|--------|---|----------|----------|
| <a href="#">actin binding motor protein</a>               | <a href="#">27</a>    | <a href="#">4</a>   | .53    | 7.53   | + | 2.85E-03 | 1.73E-02 |
| <a href="#">calmodulin-related</a>                        | <a href="#">62</a>    | <a href="#">9</a>   | 1.22   | 7.38   | + | 8.82E-06 | 1.15E-04 |
| ↳ <a href="#">calcium-binding protein</a>                 | <a href="#">79</a>    | <a href="#">15</a>  | 1.55   | 9.65   | + | 3.48E-10 | 9.69E-09 |
| <a href="#">cysteine protease</a>                         | <a href="#">136</a>   | <a href="#">11</a>  | 2.68   | 4.11   | + | 1.37E-04 | 1.27E-03 |
| ↳ <a href="#">protease</a>                                | <a href="#">597</a>   | <a href="#">34</a>  | 11.74  | 2.90   | + | 8.29E-08 | 1.47E-06 |
| ↳ <a href="#">protein modifying enzyme</a>                | <a href="#">1204</a>  | <a href="#">38</a>  | 23.69  | 1.60   | + | 5.44E-03 | 3.03E-02 |
| <a href="#">serine protease</a>                           | <a href="#">229</a>   | <a href="#">14</a>  | 4.50   | 3.11   | + | 2.88E-04 | 2.44E-03 |
| <a href="#">oxidoreductase</a>                            | <a href="#">418</a>   | <a href="#">23</a>  | 8.22   | 2.80   | + | 1.80E-05 | 2.20E-04 |
| ↳ <a href="#">metabolite interconversion enzyme</a>       | <a href="#">1428</a>  | <a href="#">46</a>  | 28.09  | 1.64   | + | 1.58E-03 | 9.96E-03 |
| <a href="#">metalloprotease</a>                           | <a href="#">167</a>   | <a href="#">9</a>   | 3.29   | 2.74   | + | 7.34E-03 | 3.97E-02 |
| Unclassified                                              | <a href="#">12347</a> | <a href="#">168</a> | 242.89 | .69    | - | 1.30E-12 | 5.05E-11 |
| <a href="#">transporter</a>                               | <a href="#">687</a>   | <a href="#">4</a>   | 13.51  | .30    | - | 4.59E-03 | 2.63E-02 |
| <a href="#">RNA binding protein</a>                       | <a href="#">615</a>   | <a href="#">2</a>   | 12.10  | .17    | - | 9.00E-04 | 6.50E-03 |
| ↳ <a href="#">nucleic acid binding protein</a>            | <a href="#">858</a>   | <a href="#">3</a>   | 16.88  | .18    | - | 7.06E-05 | 7.24E-04 |
| <a href="#">immunoglobulin</a>                            | <a href="#">389</a>   | <a href="#">0</a>   | 7.65   | < 0.01 | - | 1.09E-03 | 7.33E-03 |
| ↳ <a href="#">defense/immunity protein</a>                | <a href="#">600</a>   | <a href="#">2</a>   | 11.80  | .17    | - | 1.31E-03 | 8.49E-03 |
| <a href="#">C2H2 zinc finger transcription factor</a>     | <a href="#">424</a>   | <a href="#">0</a>   | 8.34   | < 0.01 | - | 4.81E-04 | 3.75E-03 |
| ↳ <a href="#">zinc finger transcription factor</a>        | <a href="#">502</a>   | <a href="#">0</a>   | 9.88   | < 0.01 | - | 9.88E-05 | 9.63E-04 |
| ↳ <a href="#">DNA-binding transcription factor</a>        | <a href="#">970</a>   | <a href="#">1</a>   | 19.08  | .05    | - | 1.41E-07 | 2.29E-06 |
| ↳ <a href="#">gene-specific transcriptional regulator</a> | <a href="#">1054</a>  | <a href="#">1</a>   | 20.73  | .05    | - | 2.94E-08 | 5.73E-07 |
| <a href="#">G-protein coupled receptor</a>                | <a href="#">568</a>   | <a href="#">0</a>   | 11.17  | < 0.01 | - | 3.17E-05 | 3.63E-04 |
| ↳ <a href="#">transmembrane signal receptor</a>           | <a href="#">712</a>   | <a href="#">4</a>   | 14.01  | .29    | - | 3.36E-03 | 1.99E-02 |

[PANTHER 15.0 released!](#)

Analysis Summary: Please report in publication [vWAT-MSC secretome from HFD mice](#)

**Analysis Type:** PANTHER Overrepresentation Test (Released 20190711)

---

**Annotation Version and Release Date:** PANTHER version 15 Released 2020-02-14

---

**Analyzed List:** Client Text Box Input (Mus musculus) [Change](#)

---

**Reference List:** Mus musculus (all genes in database) [Change](#)

---

**Annotation Data Set:** PANTHER GO-Slim Molecular Function [?](#)

---

**Test Type:**  Fisher's Exact  Binomial

---

**Correction:**  Calculate False Discovery Rate  Use the Bonferroni correction for multiple testing [?](#)  No correction

Results [?](#)

|                               | Reference list                     | Client Text Box Input          |
|-------------------------------|------------------------------------|--------------------------------|
| Uniquely Mapped IDs:          | <a href="#">22265</a> out of 22265 | <a href="#">377</a> out of 378 |
| Unmapped IDs:                 | <a href="#">0</a>                  | <a href="#">3</a>              |
| Multiple mapping information: | 0                                  | <a href="#">10</a>             |

Export [Table](#) [XML with user input ids](#) [JSON with user input ids](#) View: [-- Please select a chart to display --](#)

Displaying only results for FDR P < 0.05, [click here to display all results](#)

|                                                             | Mus musculus (REF)   | Client Text Box Input ( <a href="#">Hierarchy</a> <a href="#">NEW!</a> <a href="#">?</a> ) |          |                 |     |             |          |
|-------------------------------------------------------------|----------------------|--------------------------------------------------------------------------------------------|----------|-----------------|-----|-------------|----------|
|                                                             | #                    | #                                                                                          | expected | Fold Enrichment | +/- | raw P value | FDR      |
| <a href="#">PANTHER GO-Slim Molecular Function</a>          |                      |                                                                                            |          |                 |     |             |          |
| <a href="#">extracellular matrix binding</a>                | <a href="#">10</a>   | <a href="#">3</a>                                                                          | .17      | 17.67           | +   | 1.17E-03    | 1.19E-02 |
| ↳ <a href="#">binding</a>                                   | <a href="#">4859</a> | <a href="#">127</a>                                                                        | 82.49    | 1.54            | +   | 1.71E-07    | 5.05E-06 |
| <a href="#">extracellular matrix structural constituent</a> | <a href="#">11</a>   | <a href="#">3</a>                                                                          | .19      | 16.06           | +   | 1.47E-03    | 1.44E-02 |
| ↳ <a href="#">structural molecule activity</a>              | <a href="#">218</a>  | <a href="#">21</a>                                                                         | 3.70     | 5.67            | +   | 6.90E-10    | 4.07E-08 |
| <a href="#">unfolded protein binding</a>                    | <a href="#">45</a>   | <a href="#">10</a>                                                                         | .76      | 13.09           | +   | 2.24E-08    | 7.92E-07 |
| ↳ <a href="#">protein binding</a>                           | <a href="#">2575</a> | <a href="#">84</a>                                                                         | 43.72    | 1.92            | +   | 6.26E-09    | 2.56E-07 |
| <a href="#">actin filament binding</a>                      | <a href="#">84</a>   | <a href="#">18</a>                                                                         | 1.43     | 12.62           | +   | 8.56E-14    | 7.58E-12 |
| ↳ <a href="#">actin binding</a>                             | <a href="#">129</a>  | <a href="#">23</a>                                                                         | 2.19     | 10.50           | +   | 9.68E-16    | 1.28E-13 |
| ↳ <a href="#">cytoskeletal protein binding</a>              | <a href="#">340</a>  | <a href="#">27</a>                                                                         | 5.77     | 4.68            | +   | 1.42E-10    | 1.08E-08 |
| ↳ <a href="#">protein-containing complex binding</a>        | <a href="#">283</a>  | <a href="#">29</a>                                                                         | 4.80     | 6.04            | +   | 8.52E-14    | 9.05E-12 |
| <a href="#">rRNA binding</a>                                | <a href="#">25</a>   | <a href="#">4</a>                                                                          | .42      | 9.42            | +   | 1.30E-03    | 1.31E-02 |
| <a href="#">copper ion binding</a>                          | <a href="#">19</a>   | <a href="#">3</a>                                                                          | .32      | 9.30            | +   | 5.62E-03    | 4.52E-02 |
| ↳ <a href="#">transition metal ion binding</a>              | <a href="#">87</a>   | <a href="#">7</a>                                                                          | 1.48     | 4.74            | +   | 1.01E-03    | 1.05E-02 |
| ↳ <a href="#">metal ion binding</a>                         | <a href="#">219</a>  | <a href="#">17</a>                                                                         | 3.72     | 4.57            | +   | 5.22E-07    | 1.39E-05 |
| ↳ <a href="#">cation binding</a>                            | <a href="#">314</a>  | <a href="#">17</a>                                                                         | 5.33     | 3.19            | +   | 4.64E-05    | 6.66E-04 |
| ↳ <a href="#">ion binding</a>                               | <a href="#">711</a>  | <a href="#">35</a>                                                                         | 12.07    | 2.90            | +   | 4.36E-08    | 1.45E-06 |
| <a href="#">ATP binding</a>                                 | <a href="#">32</a>   | <a href="#">5</a>                                                                          | .54      | 9.20            | +   | 3.55E-04    | 4.09E-03 |
| ↳ <a href="#">purine ribonucleotide binding</a>             | <a href="#">167</a>  | <a href="#">11</a>                                                                         | 2.84     | 3.88            | +   | 2.10E-04    | 2.60E-03 |
| ↳ <a href="#">ribonucleotide binding</a>                    | <a href="#">173</a>  | <a href="#">11</a>                                                                         | 2.94     | 3.75            | +   | 2.80E-04    | 3.38E-03 |

|                                                                                       |                       |                     |        |        |   |          |          |
|---------------------------------------------------------------------------------------|-----------------------|---------------------|--------|--------|---|----------|----------|
| <a href="#">↳nucleotide binding</a>                                                   | <a href="#">220</a>   | <a href="#">14</a>  | 3.74   | 3.75   | + | 4.25E-05 | 6.45E-04 |
| <a href="#">↳nucleoside phosphate binding</a>                                         | <a href="#">220</a>   | <a href="#">14</a>  | 3.74   | 3.75   | + | 4.25E-05 | 6.64E-04 |
| <a href="#">↳small molecule binding</a>                                               | <a href="#">358</a>   | <a href="#">18</a>  | 6.08   | 2.96   | + | 6.93E-05 | 9.43E-04 |
| <a href="#">↳carbohydrate derivative binding</a>                                      | <a href="#">242</a>   | <a href="#">16</a>  | 4.11   | 3.89   | + | 7.79E-06 | 1.53E-04 |
| <a href="#">↳purine nucleotide binding</a>                                            | <a href="#">179</a>   | <a href="#">12</a>  | 3.04   | 3.95   | + | 9.36E-05 | 1.24E-03 |
| <a href="#">↳purine ribonucleoside triphosphate binding</a>                           | <a href="#">142</a>   | <a href="#">8</a>   | 2.41   | 3.32   | + | 3.78E-03 | 3.29E-02 |
| <a href="#">↳anion binding</a>                                                        | <a href="#">473</a>   | <a href="#">18</a>  | 8.03   | 2.24   | + | 1.88E-03 | 1.82E-02 |
| <a href="#">↳drug binding</a>                                                         | <a href="#">117</a>   | <a href="#">10</a>  | 1.99   | 5.03   | + | 5.52E-05 | 7.72E-04 |
| <a href="#">integrin binding</a>                                                      | <a href="#">28</a>    | <a href="#">4</a>   | .48    | 8.41   | + | 1.90E-03 | 1.80E-02 |
| <a href="#">↳cell adhesion molecule binding</a>                                       | <a href="#">70</a>    | <a href="#">7</a>   | 1.19   | 5.89   | + | 3.01E-04 | 3.56E-03 |
| <a href="#">isomerase activity</a>                                                    | <a href="#">85</a>    | <a href="#">12</a>  | 1.44   | 8.32   | + | 7.84E-08 | 2.45E-06 |
| <a href="#">↳catalytic activity</a>                                                   | <a href="#">3715</a>  | <a href="#">114</a> | 63.07  | 1.81   | + | 1.66E-10 | 1.10E-08 |
| <a href="#">oxidoreductase activity, acting on peroxide as acceptor</a>               | <a href="#">36</a>    | <a href="#">4</a>   | .61    | 6.54   | + | 4.35E-03 | 3.66E-02 |
| <a href="#">↳oxidoreductase activity</a>                                              | <a href="#">443</a>   | <a href="#">24</a>  | 7.52   | 3.19   | + | 1.29E-06 | 2.99E-05 |
| <a href="#">structural constituent of ribosome</a>                                    | <a href="#">128</a>   | <a href="#">12</a>  | 2.17   | 5.52   | + | 4.22E-06 | 9.33E-05 |
| <a href="#">metallopeptidase activity</a>                                             | <a href="#">75</a>    | <a href="#">7</a>   | 1.27   | 5.50   | + | 4.44E-04 | 5.01E-03 |
| <a href="#">↳peptidase activity, acting on L-amino acid peptides</a>                  | <a href="#">454</a>   | <a href="#">41</a>  | 7.71   | 5.32   | + | 2.91E-17 | 7.73E-15 |
| <a href="#">↳peptidase activity</a>                                                   | <a href="#">463</a>   | <a href="#">41</a>  | 7.86   | 5.22   | + | 5.50E-17 | 9.73E-15 |
| <a href="#">↳hydrolase activity</a>                                                   | <a href="#">1631</a>  | <a href="#">62</a>  | 27.69  | 2.24   | + | 4.49E-09 | 2.38E-07 |
| <a href="#">↳catalytic activity, acting on a protein</a>                              | <a href="#">1447</a>  | <a href="#">57</a>  | 24.57  | 2.32   | + | 6.94E-09 | 2.63E-07 |
| <a href="#">endopeptidase inhibitor activity</a>                                      | <a href="#">108</a>   | <a href="#">10</a>  | 1.83   | 5.45   | + | 2.94E-05 | 4.88E-04 |
| <a href="#">↳peptidase inhibitor activity</a>                                         | <a href="#">108</a>   | <a href="#">10</a>  | 1.83   | 5.45   | + | 2.94E-05 | 4.73E-04 |
| <a href="#">↳peptidase regulator activity</a>                                         | <a href="#">114</a>   | <a href="#">11</a>  | 1.94   | 5.68   | + | 8.23E-06 | 1.56E-04 |
| <a href="#">↳enzyme regulator activity</a>                                            | <a href="#">389</a>   | <a href="#">18</a>  | 6.60   | 2.73   | + | 1.86E-04 | 2.36E-03 |
| <a href="#">↳molecular function regulator</a>                                         | <a href="#">728</a>   | <a href="#">26</a>  | 12.36  | 2.10   | + | 6.77E-04 | 7.33E-03 |
| <a href="#">↳enzyme inhibitor activity</a>                                            | <a href="#">149</a>   | <a href="#">12</a>  | 2.53   | 4.74   | + | 1.76E-05 | 3.01E-04 |
| <a href="#">protease binding</a>                                                      | <a href="#">119</a>   | <a href="#">11</a>  | 2.02   | 5.44   | + | 1.20E-05 | 2.19E-04 |
| <a href="#">↳enzyme binding</a>                                                       | <a href="#">618</a>   | <a href="#">21</a>  | 10.49  | 2.00   | + | 4.00E-03 | 3.43E-02 |
| <a href="#">serine-type endopeptidase activity</a>                                    | <a href="#">148</a>   | <a href="#">12</a>  | 2.51   | 4.78   | + | 1.65E-05 | 2.93E-04 |
| <a href="#">↳serine hydrolase activity</a>                                            | <a href="#">152</a>   | <a href="#">13</a>  | 2.58   | 5.04   | + | 4.30E-06 | 9.14E-05 |
| <a href="#">↳hydrolase activity, acting on acid phosphorus-nitrogen bonds</a>         | <a href="#">152</a>   | <a href="#">13</a>  | 2.58   | 5.04   | + | 4.30E-06 | 8.79E-05 |
| <a href="#">↳endopeptidase activity</a>                                               | <a href="#">355</a>   | <a href="#">37</a>  | 6.03   | 6.14   | + | 1.63E-17 | 8.67E-15 |
| <a href="#">calcium ion binding</a>                                                   | <a href="#">119</a>   | <a href="#">7</a>   | 2.02   | 3.46   | + | 5.29E-03 | 4.32E-02 |
| Unclassified                                                                          | <a href="#">13264</a> | <a href="#">168</a> | 225.19 | .75    | - | 4.94E-09 | 2.39E-07 |
| <a href="#">DNA binding</a>                                                           | <a href="#">803</a>   | <a href="#">4</a>   | 13.63  | .29    | - | 4.60E-03 | 3.82E-02 |
| <a href="#">inorganic molecular entity transmembrane transporter activity</a>         | <a href="#">550</a>   | <a href="#">1</a>   | 9.34   | .11    | - | 1.93E-03 | 1.80E-02 |
| <a href="#">↳transmembrane transporter activity</a>                                   | <a href="#">701</a>   | <a href="#">1</a>   | 11.90  | .08    | - | 1.38E-04 | 1.78E-03 |
| <a href="#">ion transmembrane transporter activity</a>                                | <a href="#">581</a>   | <a href="#">1</a>   | 9.86   | .10    | - | 8.91E-04 | 9.46E-03 |
| <a href="#">G protein-coupled receptor activity</a>                                   | <a href="#">405</a>   | <a href="#">0</a>   | 6.88   | < 0.01 | - | 2.41E-03 | 2.21E-02 |
| <a href="#">↳transmembrane signaling receptor activity</a>                            | <a href="#">1182</a>  | <a href="#">2</a>   | 20.07  | .10    | - | 5.55E-07 | 1.40E-05 |
| <a href="#">↳signaling receptor activity</a>                                          | <a href="#">1282</a>  | <a href="#">3</a>   | 21.76  | .14    | - | 8.76E-07 | 2.11E-05 |
| <a href="#">↳molecular transducer activity</a>                                        | <a href="#">1349</a>  | <a href="#">3</a>   | 22.90  | .13    | - | 2.85E-07 | 7.97E-06 |
| <a href="#">DNA-binding transcription factor activity, RNA polymerase II-specific</a> | <a href="#">366</a>   | <a href="#">0</a>   | 6.21   | < 0.01 | - | 3.36E-03 | 3.02E-02 |
| <a href="#">↳DNA-binding transcription factor activity</a>                            | <a href="#">618</a>   | <a href="#">0</a>   | 10.49  | < 0.01 | - | 4.35E-05 | 6.42E-04 |
| <a href="#">↳transcription regulator activity</a>                                     | <a href="#">772</a>   | <a href="#">2</a>   | 13.11  | .15    | - | 4.63E-04 | 5.12E-03 |
| <a href="#">protein serine/threonine kinase activity</a>                              | <a href="#">374</a>   | <a href="#">0</a>   | 6.35   | < 0.01 | - | 3.42E-03 | 3.03E-02 |



[PANTHER 15.0 released!](#)

Analysis Summary: Please report in publication [?](#) **SWAT-MSC secretome from HFD mice**

**Analysis Type:** PANTHER Overrepresentation Test (Released 20190711)

---

**Annotation Version and Release Date:** PANTHER version 15 Released 2020-02-14

---

**Analyzed List:** Client Text Box Input (Mus musculus) [Change](#)

---

**Reference List:** Mus musculus (all genes in database) [Change](#)

---

**Annotation Data Set:** PANTHER GO-Slim Molecular Function ?

---

**Test Type:**  Fisher's Exact  Binomial

---

**Correction:**  Calculate False Discovery Rate  Use the Bonferroni correction for multiple testing ?  No correction

Results ?

|                               | Reference list                     | Client Text Box Input          |
|-------------------------------|------------------------------------|--------------------------------|
| Uniquely Mapped IDs:          | <a href="#">22265</a> out of 22265 | <a href="#">506</a> out of 505 |
| Unmapped IDs:                 | <a href="#">0</a>                  | <a href="#">4</a>              |
| Multiple mapping information: | <a href="#">0</a>                  | <a href="#">8</a>              |

Export [Table](#) [XML with user input ids](#) [JSON with user input ids](#) View: -- Please select a chart to display --

Displaying only results for FDR P < 0.05, [click here to display all results](#)

|                                                             | Mus musculus (REF)   | Client Text Box Input ( <a href="#">?</a> <a href="#">Hierarchy</a> <a href="#">NEW!</a> <a href="#">?</a> ) |          |                 |     |             |          |
|-------------------------------------------------------------|----------------------|--------------------------------------------------------------------------------------------------------------|----------|-----------------|-----|-------------|----------|
|                                                             | #                    | #                                                                                                            | expected | Fold Enrichment | +/- | raw P value | FDR      |
| <a href="#">PANTHER GO-Slim Molecular Function</a>          |                      |                                                                                                              |          |                 |     |             |          |
| <a href="#">extracellular matrix structural constituent</a> | <a href="#">11</a>   | <a href="#">5</a>                                                                                            | .25      | 20.04           | +   | 1.88E-05    | 2.62E-04 |
| ↳ <a href="#">structural molecule activity</a>              | <a href="#">218</a>  | <a href="#">24</a>                                                                                           | 4.94     | 4.85            | +   | 1.07E-09    | 3.80E-08 |
| <a href="#">extracellular matrix binding</a>                | <a href="#">10</a>   | <a href="#">4</a>                                                                                            | .23      | 17.64           | +   | 2.01E-04    | 1.77E-03 |
| ↳ <a href="#">binding</a>                                   | <a href="#">4859</a> | <a href="#">170</a>                                                                                          | 110.21   | 1.54            | +   | 1.81E-09    | 5.65E-08 |
| <a href="#">integrin binding</a>                            | <a href="#">28</a>   | <a href="#">11</a>                                                                                           | .64      | 17.32           | +   | 5.48E-10    | 2.24E-08 |
| ↳ <a href="#">cell adhesion molecule binding</a>            | <a href="#">70</a>   | <a href="#">14</a>                                                                                           | 1.59     | 8.82            | +   | 4.47E-09    | 1.32E-07 |
| ↳ <a href="#">protein binding</a>                           | <a href="#">2575</a> | <a href="#">118</a>                                                                                          | 58.40    | 2.02            | +   | 2.52E-13    | 2.23E-11 |
| ↳ <a href="#">protein-containing complex binding</a>        | <a href="#">283</a>  | <a href="#">41</a>                                                                                           | 6.42     | 6.39            | +   | 1.77E-19    | 9.42E-17 |
| <a href="#">disulfide oxidoreductase activity</a>           | <a href="#">9</a>    | <a href="#">3</a>                                                                                            | .20      | 14.70           | +   | 2.05E-03    | 1.42E-02 |
| ↳ <a href="#">oxidoreductase activity</a>                   | <a href="#">443</a>  | <a href="#">27</a>                                                                                           | 10.05    | 2.69            | +   | 7.44E-06    | 1.20E-04 |
| ↳ <a href="#">catalytic activity</a>                        | <a href="#">3715</a> | <a href="#">146</a>                                                                                          | 84.26    | 1.73            | +   | 1.63E-11    | 8.68E-10 |
| <a href="#">unfolded protein binding</a>                    | <a href="#">45</a>   | <a href="#">14</a>                                                                                           | 1.02     | 13.72           | +   | 3.11E-11    | 1.38E-09 |
| <a href="#">heparin binding</a>                             | <a href="#">27</a>   | <a href="#">7</a>                                                                                            | .61      | 11.43           | +   | 8.10E-06    | 1.27E-04 |
| ↳ <a href="#">glycosaminoglycan binding</a>                 | <a href="#">42</a>   | <a href="#">8</a>                                                                                            | .95      | 8.40            | +   | 1.31E-05    | 1.88E-04 |
| ↳ <a href="#">carbohydrate derivative binding</a>           | <a href="#">242</a>  | <a href="#">24</a>                                                                                           | 5.49     | 4.37            | +   | 7.08E-09    | 1.88E-07 |
| ↳ <a href="#">anion binding</a>                             | <a href="#">473</a>  | <a href="#">29</a>                                                                                           | 10.73    | 2.70            | +   | 3.07E-06    | 5.62E-05 |
| ↳ <a href="#">ion binding</a>                               | <a href="#">711</a>  | <a href="#">49</a>                                                                                           | 16.13    | 3.04            | +   | 2.56E-11    | 1.24E-09 |
| <a href="#">actin filament binding</a>                      | <a href="#">84</a>   | <a href="#">19</a>                                                                                           | 1.91     | 9.97            | +   | 1.17E-12    | 8.91E-11 |
| ↳ <a href="#">actin binding</a>                             | <a href="#">129</a>  | <a href="#">24</a>                                                                                           | 2.93     | 8.20            | +   | 5.37E-14    | 5.70E-12 |
| ↳ <a href="#">cytoskeletal protein binding</a>              | <a href="#">340</a>  | <a href="#">30</a>                                                                                           | 7.71     | 3.89            | +   | 1.20E-09    | 3.97E-08 |



|                                                                                |                       |                     |        |        |   |          |          |
|--------------------------------------------------------------------------------|-----------------------|---------------------|--------|--------|---|----------|----------|
| <a href="#">heat shock protein binding</a>                                     | <a href="#">26</a>    | <a href="#">5</a>   | .59    | 8.48   | + | 5.55E-04 | 4.15E-03 |
| <a href="#">isomerase activity</a>                                             | <a href="#">85</a>    | <a href="#">16</a>  | 1.93   | 8.30   | + | 7.65E-10 | 2.90E-08 |
| <a href="#">2-oxoglutarate-dependent dioxygenase activity</a>                  | <a href="#">16</a>    | <a href="#">3</a>   | .36    | 8.27   | + | 8.07E-03 | 4.87E-02 |
| <a href="#">ATP binding</a>                                                    | <a href="#">32</a>    | <a href="#">6</a>   | .73    | 8.27   | + | 1.75E-04 | 1.57E-03 |
| ↳ <a href="#">purine ribonucleotide binding</a>                                | <a href="#">167</a>   | <a href="#">16</a>  | 3.79   | 4.22   | + | 3.48E-06 | 6.16E-05 |
| ↳ <a href="#">ribonucleotide binding</a>                                       | <a href="#">173</a>   | <a href="#">16</a>  | 3.92   | 4.08   | + | 5.27E-06 | 9.03E-05 |
| ↳ <a href="#">nucleotide binding</a>                                           | <a href="#">220</a>   | <a href="#">20</a>  | 4.99   | 4.01   | + | 4.61E-07 | 1.02E-05 |
| ↳ <a href="#">nucleoside phosphate binding</a>                                 | <a href="#">220</a>   | <a href="#">20</a>  | 4.99   | 4.01   | + | 4.61E-07 | 1.07E-05 |
| ↳ <a href="#">small molecule binding</a>                                       | <a href="#">358</a>   | <a href="#">22</a>  | 8.12   | 2.71   | + | 4.60E-05 | 5.43E-04 |
| ↳ <a href="#">purine nucleotide binding</a>                                    | <a href="#">179</a>   | <a href="#">17</a>  | 4.06   | 4.19   | + | 1.93E-06 | 3.94E-05 |
| ↳ <a href="#">purine ribonucleoside triphosphate binding</a>                   | <a href="#">142</a>   | <a href="#">12</a>  | 3.22   | 3.73   | + | 1.73E-04 | 1.58E-03 |
| ↳ <a href="#">drug binding</a>                                                 | <a href="#">117</a>   | <a href="#">11</a>  | 2.65   | 4.15   | + | 1.35E-04 | 1.33E-03 |
| <a href="#">rRNA binding</a>                                                   | <a href="#">25</a>    | <a href="#">4</a>   | .57    | 7.05   | + | 3.66E-03 | 2.43E-02 |
| <a href="#">carboxypeptidase activity</a>                                      | <a href="#">30</a>    | <a href="#">4</a>   | .68    | 5.88   | + | 6.55E-03 | 4.09E-02 |
| ↳ <a href="#">peptidase activity, acting on L-amino acid peptides</a>          | <a href="#">454</a>   | <a href="#">46</a>  | 10.30  | 4.47   | + | 3.41E-16 | 6.03E-14 |
| ↳ <a href="#">peptidase activity</a>                                           | <a href="#">463</a>   | <a href="#">46</a>  | 10.50  | 4.38   | + | 6.71E-16 | 8.90E-14 |
| ↳ <a href="#">hydrolase activity</a>                                           | <a href="#">1631</a>  | <a href="#">75</a>  | 36.99  | 2.03   | + | 1.05E-08 | 2.66E-07 |
| ↳ <a href="#">catalytic activity, acting on a protein</a>                      | <a href="#">1447</a>  | <a href="#">70</a>  | 32.82  | 2.13   | + | 6.39E-09 | 1.79E-07 |
| <a href="#">growth factor binding</a>                                          | <a href="#">38</a>    | <a href="#">5</a>   | .86    | 5.80   | + | 2.53E-03 | 1.72E-02 |
| <a href="#">metalloendopeptidase activity</a>                                  | <a href="#">42</a>    | <a href="#">5</a>   | .95    | 5.25   | + | 3.75E-03 | 2.46E-02 |
| ↳ <a href="#">endopeptidase activity</a>                                       | <a href="#">355</a>   | <a href="#">41</a>  | 8.05   | 5.09   | + | 2.53E-16 | 6.72E-14 |
| ↳ <a href="#">metallopeptidase activity</a>                                    | <a href="#">75</a>    | <a href="#">9</a>   | 1.70   | 5.29   | + | 1.02E-04 | 1.06E-03 |
| <a href="#">endopeptidase inhibitor activity</a>                               | <a href="#">108</a>   | <a href="#">11</a>  | 2.45   | 4.49   | + | 7.00E-05 | 7.58E-04 |
| ↳ <a href="#">peptidase inhibitor activity</a>                                 | <a href="#">108</a>   | <a href="#">11</a>  | 2.45   | 4.49   | + | 7.00E-05 | 7.43E-04 |
| ↳ <a href="#">peptidase regulator activity</a>                                 | <a href="#">114</a>   | <a href="#">11</a>  | 2.59   | 4.25   | + | 1.09E-04 | 1.09E-03 |
| ↳ <a href="#">enzyme regulator activity</a>                                    | <a href="#">389</a>   | <a href="#">22</a>  | 8.82   | 2.49   | + | 2.35E-04 | 1.98E-03 |
| ↳ <a href="#">molecular function regulator</a>                                 | <a href="#">728</a>   | <a href="#">39</a>  | 16.51  | 2.36   | + | 1.98E-06 | 3.90E-05 |
| ↳ <a href="#">enzyme inhibitor activity</a>                                    | <a href="#">149</a>   | <a href="#">13</a>  | 3.38   | 3.85   | + | 6.94E-05 | 7.84E-04 |
| <a href="#">structural constituent of ribosome</a>                             | <a href="#">128</a>   | <a href="#">12</a>  | 2.90   | 4.13   | + | 6.95E-05 | 7.69E-04 |
| <a href="#">protease binding</a>                                               | <a href="#">119</a>   | <a href="#">11</a>  | 2.70   | 4.08   | + | 1.55E-04 | 1.50E-03 |
| ↳ <a href="#">enzyme binding</a>                                               | <a href="#">618</a>   | <a href="#">25</a>  | 14.02  | 1.78   | + | 6.28E-03 | 3.97E-02 |
| <a href="#">transition metal ion binding</a>                                   | <a href="#">87</a>    | <a href="#">8</a>   | 1.97   | 4.05   | + | 1.25E-03 | 8.82E-03 |
| ↳ <a href="#">metal ion binding</a>                                            | <a href="#">219</a>   | <a href="#">20</a>  | 4.97   | 4.03   | + | 4.32E-07 | 1.04E-05 |
| ↳ <a href="#">cation binding</a>                                               | <a href="#">314</a>   | <a href="#">20</a>  | 7.12   | 2.81   | + | 6.36E-05 | 7.34E-04 |
| <a href="#">serine-type endopeptidase activity</a>                             | <a href="#">148</a>   | <a href="#">12</a>  | 3.36   | 3.57   | + | 2.47E-04 | 2.05E-03 |
| ↳ <a href="#">serine hydrolase activity</a>                                    | <a href="#">152</a>   | <a href="#">14</a>  | 3.45   | 4.06   | + | 2.12E-05 | 2.88E-04 |
| ↳ <a href="#">hydrolase activity, acting on acid phosphorus-nitrogen bonds</a> | <a href="#">152</a>   | <a href="#">14</a>  | 3.45   | 4.06   | + | 2.12E-05 | 2.81E-04 |
| <a href="#">cysteine-type endopeptidase activity</a>                           | <a href="#">93</a>    | <a href="#">7</a>   | 2.11   | 3.32   | + | 6.90E-03 | 4.26E-02 |
| <a href="#">calcium ion binding</a>                                            | <a href="#">119</a>   | <a href="#">8</a>   | 2.70   | 2.96   | + | 7.46E-03 | 4.55E-02 |
| <a href="#">receptor ligand activity</a>                                       | <a href="#">231</a>   | <a href="#">15</a>  | 5.24   | 2.86   | + | 4.22E-04 | 3.35E-03 |
| ↳ <a href="#">signaling receptor activator activity</a>                        | <a href="#">232</a>   | <a href="#">15</a>  | 5.26   | 2.85   | + | 4.41E-04 | 3.44E-03 |
| ↳ <a href="#">receptor regulator activity</a>                                  | <a href="#">255</a>   | <a href="#">16</a>  | 5.78   | 2.77   | + | 3.93E-04 | 3.16E-03 |
| Unclassified                                                                   | <a href="#">13264</a> | <a href="#">223</a> | 300.85 | .74    | - | 6.26E-12 | 4.15E-10 |
| <a href="#">protein serine/threonine kinase activity</a>                       | <a href="#">374</a>   | <a href="#">1</a>   | 8.48   | .12    | - | 3.93E-03 | 2.55E-02 |
| <a href="#">G protein-coupled receptor activity</a>                            | <a href="#">405</a>   | <a href="#">0</a>   | 9.19   | < 0.01 | - | 2.21E-04 | 1.89E-03 |
| ↳ <a href="#">transmembrane signaling receptor activity</a>                    | <a href="#">1182</a>  | <a href="#">6</a>   | 26.81  | .22    | - | 2.26E-06 | 4.28E-05 |
| ↳ <a href="#">signaling receptor activity</a>                                  | <a href="#">1282</a>  | <a href="#">9</a>   | 29.08  | .31    | - | 2.27E-05 | 2.94E-04 |
| ↳ <a href="#">molecular transducer activity</a>                                | <a href="#">1349</a>  | <a href="#">9</a>   | 30.60  | .29    | - | 6.26E-06 | 1.04E-04 |

|                                                                                       |                     |                   |       |        |   |          |          |
|---------------------------------------------------------------------------------------|---------------------|-------------------|-------|--------|---|----------|----------|
| <a href="#">DNA-binding transcription factor activity, RNA polymerase II-specific</a> | <a href="#">366</a> | <a href="#">0</a> | 8.30  | < 0.01 | - | 4.72E-04 | 3.63E-03 |
| ↳ <a href="#">DNA-binding transcription factor activity</a>                           | <a href="#">618</a> | <a href="#">0</a> | 14.02 | < 0.01 | - | 1.25E-06 | 2.65E-05 |
| ↳ <a href="#">transcription regulator activity</a>                                    | <a href="#">772</a> | <a href="#">2</a> | 17.51 | .11    | - | 8.58E-06 | 1.30E-04 |
| <a href="#">RNA polymerase II regulatory region sequence-specific DNA binding</a>     | <a href="#">344</a> | <a href="#">0</a> | 7.80  | < 0.01 | - | 6.92E-04 | 5.03E-03 |
| ↳ <a href="#">transcription regulatory region sequence-specific DNA binding</a>       | <a href="#">372</a> | <a href="#">0</a> | 8.44  | < 0.01 | - | 4.91E-04 | 3.73E-03 |
| ↳ <a href="#">sequence-specific double-stranded DNA binding</a>                       | <a href="#">395</a> | <a href="#">0</a> | 8.96  | < 0.01 | - | 2.13E-04 | 1.85E-03 |
| ↳ <a href="#">sequence-specific DNA binding</a>                                       | <a href="#">538</a> | <a href="#">0</a> | 12.20 | < 0.01 | - | 9.18E-06 | 1.35E-04 |
| ↳ <a href="#">DNA binding</a>                                                         | <a href="#">803</a> | <a href="#">3</a> | 18.21 | .16    | - | 2.51E-05 | 3.18E-04 |
| ↳ <a href="#">double-stranded DNA binding</a>                                         | <a href="#">444</a> | <a href="#">0</a> | 10.07 | < 0.01 | - | 1.05E-04 | 1.08E-03 |
| ↳ <a href="#">transcription regulatory region DNA binding</a>                         | <a href="#">428</a> | <a href="#">0</a> | 9.71  | < 0.01 | - | 1.58E-04 | 1.50E-03 |
| ↳ <a href="#">regulatory region nucleic acid binding</a>                              | <a href="#">428</a> | <a href="#">0</a> | 9.71  | < 0.01 | - | 1.58E-04 | 1.47E-03 |
| ↳ <a href="#">RNA polymerase II regulatory region DNA binding</a>                     | <a href="#">349</a> | <a href="#">0</a> | 7.92  | < 0.01 | - | 7.00E-04 | 5.03E-03 |
| <a href="#">monovalent inorganic cation transmembrane transporter activity</a>        | <a href="#">261</a> | <a href="#">0</a> | 5.92  | < 0.01 | - | 4.97E-03 | 3.18E-02 |
| ↳ <a href="#">inorganic cation transmembrane transporter activity</a>                 | <a href="#">395</a> | <a href="#">1</a> | 8.96  | .11    | - | 2.77E-03 | 1.86E-02 |
| ↳ <a href="#">inorganic molecular entity transmembrane transporter activity</a>       | <a href="#">550</a> | <a href="#">2</a> | 12.47 | .16    | - | 6.31E-04 | 4.66E-03 |
| ↳ <a href="#">transmembrane transporter activity</a>                                  | <a href="#">701</a> | <a href="#">2</a> | 15.90 | .13    | - | 3.71E-05 | 4.48E-04 |
| ↳ <a href="#">transporter activity</a>                                                | <a href="#">782</a> | <a href="#">3</a> | 17.74 | .17    | - | 3.56E-05 | 4.40E-04 |
| ↳ <a href="#">cation transmembrane transporter activity</a>                           | <a href="#">424</a> | <a href="#">1</a> | 9.62  | .10    | - | 1.30E-03 | 9.08E-03 |
| ↳ <a href="#">ion transmembrane transporter activity</a>                              | <a href="#">581</a> | <a href="#">2</a> | 13.18 | .15    | - | 3.10E-04 | 2.53E-03 |

[PANTHER 15.0 released!](#)

Analysis Summary: Please report in publication [?](#) **BM-MSC secretome from HFD mice**

**Analysis Type:** PANTHER Overrepresentation Test (Released 20190711)

---

**Annotation Version and Release Date:** PANTHER version 15 Released 2020-02-14

---

**Analyzed List:** Client Text Box Input (Mus musculus) [Change](#)

---

**Reference List:** Mus musculus (all genes in database) [Change](#)

---

**Annotation Data Set:** PANTHER GO-Slim Molecular Function [?](#)

---

**Test Type:**  Fisher's Exact  Binomial

---

**Correction:**  Calculate False Discovery Rate  Use the Bonferroni correction for multiple testing [?](#)  No correction

Results [?](#)

|                               | Reference list                     | Client Text Box Input          |
|-------------------------------|------------------------------------|--------------------------------|
| Uniquely Mapped IDs:          | <a href="#">22265</a> out of 22265 | <a href="#">438</a> out of 438 |
| Unmapped IDs:                 | <a href="#">0</a>                  | <a href="#">3</a>              |
| Multiple mapping information: | <a href="#">0</a>                  | <a href="#">9</a>              |

Export [Table](#) [XML with user input ids](#) [JSON with user input ids](#) View: -- Please select a chart to display --

Displaying only results for FDR P < 0.05, [click here to display all results](#)

| PANTHER GO-Slim Molecular Function                                    | Mus musculus (REF)   |                     | Client Text Box Input ( <a href="#">Hierarchy</a> <a href="#">NEW!</a> <a href="#">?</a> ) |                 |     |             |          |
|-----------------------------------------------------------------------|----------------------|---------------------|--------------------------------------------------------------------------------------------|-----------------|-----|-------------|----------|
|                                                                       | #                    | #                   | expected                                                                                   | Fold Enrichment | +/- | raw P value | FDR      |
| <a href="#">extracellular matrix structural constituent</a>           | <a href="#">11</a>   | <a href="#">5</a>   | .22                                                                                        | 23.11           | +   | 9.57E-06    | 1.45E-04 |
| ↳ <a href="#">structural molecule activity</a>                        | <a href="#">218</a>  | <a href="#">17</a>  | 4.29                                                                                       | 3.96            | +   | 3.53E-06    | 7.20E-05 |
| <a href="#">extracellular matrix binding</a>                          | <a href="#">10</a>   | <a href="#">4</a>   | .20                                                                                        | 20.33           | +   | 1.17E-04    | 1.25E-03 |
| ↳ <a href="#">binding</a>                                             | <a href="#">4859</a> | <a href="#">142</a> | 95.59                                                                                      | 1.49            | +   | 4.69E-07    | 1.19E-05 |
| <a href="#">integrin binding</a>                                      | <a href="#">28</a>   | <a href="#">10</a>  | .55                                                                                        | 18.15           | +   | 1.88E-09    | 1.11E-07 |
| ↳ <a href="#">cell adhesion molecule binding</a>                      | <a href="#">70</a>   | <a href="#">13</a>  | 1.38                                                                                       | 9.44            | +   | 6.68E-09    | 3.22E-07 |
| ↳ <a href="#">protein binding</a>                                     | <a href="#">2575</a> | <a href="#">102</a> | 50.66                                                                                      | 2.01            | +   | 1.13E-11    | 1.00E-09 |
| ↳ <a href="#">signaling receptor binding</a>                          | <a href="#">734</a>  | <a href="#">27</a>  | 14.44                                                                                      | 1.87            | +   | 2.76E-03    | 2.12E-02 |
| ↳ <a href="#">protein-containing complex binding</a>                  | <a href="#">283</a>  | <a href="#">34</a>  | 5.57                                                                                       | 6.11            | +   | 5.71E-16    | 7.59E-14 |
| <a href="#">heparin binding</a>                                       | <a href="#">27</a>   | <a href="#">6</a>   | .53                                                                                        | 11.30           | +   | 3.55E-05    | 4.49E-04 |
| ↳ <a href="#">glycosaminoglycan binding</a>                           | <a href="#">42</a>   | <a href="#">7</a>   | .83                                                                                        | 8.47            | +   | 4.05E-05    | 4.67E-04 |
| ↳ <a href="#">carbohydrate derivative binding</a>                     | <a href="#">242</a>  | <a href="#">18</a>  | 4.76                                                                                       | 3.78            | +   | 3.40E-06    | 7.22E-05 |
| ↳ <a href="#">anion binding</a>                                       | <a href="#">473</a>  | <a href="#">21</a>  | 9.30                                                                                       | 2.26            | +   | 7.32E-04    | 6.47E-03 |
| ↳ <a href="#">ion binding</a>                                         | <a href="#">711</a>  | <a href="#">38</a>  | 13.99                                                                                      | 2.72            | +   | 6.71E-08    | 2.38E-06 |
| <a href="#">unfolded protein binding</a>                              | <a href="#">45</a>   | <a href="#">10</a>  | .89                                                                                        | 11.30           | +   | 8.68E-08    | 2.88E-06 |
| <a href="#">actin filament binding</a>                                | <a href="#">84</a>   | <a href="#">16</a>  | 1.65                                                                                       | 9.68            | +   | 8.58E-11    | 6.51E-09 |
| ↳ <a href="#">actin binding</a>                                       | <a href="#">129</a>  | <a href="#">21</a>  | 2.54                                                                                       | 8.28            | +   | 1.40E-12    | 1.48E-10 |
| ↳ <a href="#">cytoskeletal protein binding</a>                        | <a href="#">340</a>  | <a href="#">23</a>  | 6.69                                                                                       | 3.44            | +   | 7.16E-07    | 1.73E-05 |
| <a href="#">2-oxoglutarate-dependent dioxygenase activity</a>         | <a href="#">16</a>   | <a href="#">3</a>   | .31                                                                                        | 9.53            | +   | 5.49E-03    | 3.65E-02 |
| ↳ <a href="#">oxidoreductase activity</a>                             | <a href="#">443</a>  | <a href="#">25</a>  | 8.71                                                                                       | 2.87            | +   | 5.17E-06    | 9.15E-05 |
| ↳ <a href="#">catalytic activity</a>                                  | <a href="#">3715</a> | <a href="#">123</a> | 73.08                                                                                      | 1.68            | +   | 3.44E-09    | 1.83E-07 |
| <a href="#">metalloendopeptidase activity</a>                         | <a href="#">42</a>   | <a href="#">7</a>   | .83                                                                                        | 8.47            | +   | 4.05E-05    | 4.78E-04 |
| ↳ <a href="#">endopeptidase activity</a>                              | <a href="#">355</a>  | <a href="#">44</a>  | 6.98                                                                                       | 6.30            | +   | 7.83E-21    | 4.16E-18 |
| ↳ <a href="#">peptidase activity, acting on L-amino acid peptides</a> | <a href="#">454</a>  | <a href="#">48</a>  | 8.93                                                                                       | 5.37            | +   | 5.13E-20    | 1.36E-17 |
| ↳ <a href="#">peptidase activity</a>                                  | <a href="#">463</a>  | <a href="#">48</a>  | 9.11                                                                                       | 5.27            | +   | 1.08E-19    | 1.90E-17 |
| ↳ <a href="#">hydrolase activity</a>                                  | <a href="#">1631</a> | <a href="#">68</a>  | 32.09                                                                                      | 2.12            | +   | 1.11E-08    | 4.92E-07 |

|                                                                                       |                       |                     |        |        |   |          |          |
|---------------------------------------------------------------------------------------|-----------------------|---------------------|--------|--------|---|----------|----------|
| ↳catalytic activity, acting on a protein                                              | <a href="#">1447</a>  | <a href="#">68</a>  | 28.47  | 2.39   | + | 8.81E-11 | 5.85E-09 |
| ↳metallopeptidase activity                                                            | <a href="#">75</a>    | <a href="#">10</a>  | 1.48   | 6.78   | + | 5.55E-06 | 9.51E-05 |
| ATP binding                                                                           | <a href="#">32</a>    | <a href="#">5</a>   | .63    | 7.94   | + | 6.85E-04 | 6.27E-03 |
| ↳purine ribonucleotide binding                                                        | <a href="#">167</a>   | <a href="#">10</a>  | 3.29   | 3.04   | + | 2.38E-03 | 1.86E-02 |
| ↳ribonucleotide binding                                                               | <a href="#">173</a>   | <a href="#">10</a>  | 3.40   | 2.94   | + | 3.03E-03 | 2.26E-02 |
| ↳nucleotide binding                                                                   | <a href="#">220</a>   | <a href="#">13</a>  | 4.33   | 3.00   | + | 6.35E-04 | 5.92E-03 |
| ↳nucleoside phosphate binding                                                         | <a href="#">220</a>   | <a href="#">13</a>  | 4.33   | 3.00   | + | 6.35E-04 | 6.02E-03 |
| ↳purine nucleotide binding                                                            | <a href="#">179</a>   | <a href="#">10</a>  | 3.52   | 2.84   | + | 3.81E-03 | 2.77E-02 |
| ↳drug binding                                                                         | <a href="#">117</a>   | <a href="#">8</a>   | 2.30   | 3.48   | + | 2.97E-03 | 2.26E-02 |
| isomerase activity                                                                    | <a href="#">85</a>    | <a href="#">12</a>  | 1.67   | 7.18   | + | 3.71E-07 | 9.85E-06 |
| carboxypeptidase activity                                                             | <a href="#">30</a>    | <a href="#">4</a>   | .59    | 6.78   | + | 4.01E-03 | 2.76E-02 |
| growth factor binding                                                                 | <a href="#">38</a>    | <a href="#">5</a>   | .75    | 6.69   | + | 1.38E-03 | 1.14E-02 |
| endopeptidase inhibitor activity                                                      | <a href="#">108</a>   | <a href="#">12</a>  | 2.12   | 5.65   | + | 3.68E-06 | 6.98E-05 |
| ↳peptidase inhibitor activity                                                         | <a href="#">108</a>   | <a href="#">12</a>  | 2.12   | 5.65   | + | 3.68E-06 | 6.74E-05 |
| ↳peptidase regulator activity                                                         | <a href="#">114</a>   | <a href="#">12</a>  | 2.24   | 5.35   | + | 6.13E-06 | 1.02E-04 |
| ↳enzyme regulator activity                                                            | <a href="#">389</a>   | <a href="#">18</a>  | 7.65   | 2.35   | + | 1.36E-03 | 1.15E-02 |
| ↳molecular function regulator                                                         | <a href="#">728</a>   | <a href="#">36</a>  | 14.32  | 2.51   | + | 1.15E-06 | 2.64E-05 |
| ↳enzyme inhibitor activity                                                            | <a href="#">149</a>   | <a href="#">14</a>  | 2.93   | 4.78   | + | 3.57E-06 | 7.01E-05 |
| cysteine-type endopeptidase activity                                                  | <a href="#">93</a>    | <a href="#">10</a>  | 1.83   | 5.47   | + | 3.08E-05 | 4.08E-04 |
| ↳cysteine-type peptidase activity                                                     | <a href="#">158</a>   | <a href="#">11</a>  | 3.11   | 3.54   | + | 4.59E-04 | 4.43E-03 |
| protease binding                                                                      | <a href="#">119</a>   | <a href="#">12</a>  | 2.34   | 5.13   | + | 9.16E-06 | 1.43E-04 |
| cytokine activity                                                                     | <a href="#">116</a>   | <a href="#">11</a>  | 2.28   | 4.82   | + | 3.64E-05 | 4.49E-04 |
| ↳receptor ligand activity                                                             | <a href="#">231</a>   | <a href="#">16</a>  | 4.54   | 3.52   | + | 2.69E-05 | 3.76E-04 |
| ↳signaling receptor activator activity                                                | <a href="#">232</a>   | <a href="#">16</a>  | 4.56   | 3.51   | + | 2.82E-05 | 3.85E-04 |
| ↳receptor regulator activity                                                          | <a href="#">255</a>   | <a href="#">17</a>  | 5.02   | 3.39   | + | 2.40E-05 | 3.45E-04 |
| serine-type endopeptidase activity                                                    | <a href="#">148</a>   | <a href="#">14</a>  | 2.91   | 4.81   | + | 3.32E-06 | 7.34E-05 |
| ↳serine hydrolase activity                                                            | <a href="#">152</a>   | <a href="#">16</a>  | 2.99   | 5.35   | + | 1.77E-07 | 5.54E-06 |
| ↳hydrolase activity, acting on acid phosphorus-nitrogen bonds                         | <a href="#">152</a>   | <a href="#">16</a>  | 2.99   | 5.35   | + | 1.77E-07 | 5.23E-06 |
| cytokine receptor binding                                                             | <a href="#">122</a>   | <a href="#">11</a>  | 2.40   | 4.58   | + | 5.57E-05 | 6.16E-04 |
| transition metal ion binding                                                          | <a href="#">87</a>    | <a href="#">7</a>   | 1.71   | 4.09   | + | 2.30E-03 | 1.82E-02 |
| ↳metal ion binding                                                                    | <a href="#">219</a>   | <a href="#">16</a>  | 4.31   | 3.71   | + | 1.46E-05 | 2.15E-04 |
| ↳cation binding                                                                       | <a href="#">314</a>   | <a href="#">17</a>  | 6.18   | 2.75   | + | 2.64E-04 | 2.75E-03 |
| oxidoreductase activity, acting on the CH-OH group of donors, NAD or NADP as acceptor | <a href="#">76</a>    | <a href="#">6</a>   | 1.50   | 4.01   | + | 5.08E-03 | 3.42E-02 |
| G protein-coupled receptor binding                                                    | <a href="#">136</a>   | <a href="#">9</a>   | 2.68   | 3.36   | + | 2.06E-03 | 1.66E-02 |
| Unclassified                                                                          | <a href="#">13264</a> | <a href="#">203</a> | 260.93 | .78    | - | 4.22E-08 | 1.60E-06 |
| sequence-specific DNA binding                                                         | <a href="#">538</a>   | <a href="#">2</a>   | 10.58  | .19    | - | 3.70E-03 | 2.73E-02 |
| ↳DNA binding                                                                          | <a href="#">803</a>   | <a href="#">4</a>   | 15.80  | .25    | - | 9.44E-04 | 8.22E-03 |
| ↳nucleic acid binding                                                                 | <a href="#">1293</a>  | <a href="#">12</a>  | 25.44  | .47    | - | 4.80E-03 | 3.27E-02 |
| cation transmembrane transporter activity                                             | <a href="#">424</a>   | <a href="#">1</a>   | 8.34   | .12    | - | 3.89E-03 | 2.79E-02 |
| ↳ion transmembrane transporter activity                                               | <a href="#">581</a>   | <a href="#">1</a>   | 11.43  | .09    | - | 3.13E-04 | 3.14E-03 |
| ↳transmembrane transporter activity                                                   | <a href="#">701</a>   | <a href="#">1</a>   | 13.79  | .07    | - | 3.26E-05 | 4.22E-04 |
| ↳transporter activity                                                                 | <a href="#">782</a>   | <a href="#">3</a>   | 15.38  | .20    | - | 2.88E-04 | 2.94E-03 |
| transcription regulatory region DNA binding                                           | <a href="#">428</a>   | <a href="#">1</a>   | 8.42   | .12    | - | 3.91E-03 | 2.77E-02 |
| ↳regulatory region nucleic acid binding                                               | <a href="#">428</a>   | <a href="#">1</a>   | 8.42   | .12    | - | 3.91E-03 | 2.74E-02 |
| inorganic molecular entity transmembrane transporter activity                         | <a href="#">550</a>   | <a href="#">1</a>   | 10.82  | .09    | - | 4.30E-04 | 4.23E-03 |
| G protein-coupled receptor activity                                                   | <a href="#">405</a>   | <a href="#">0</a>   | 7.97   | < 0.01 | - | 7.16E-04 | 6.44E-03 |
| ↳transmembrane signaling receptor activity                                            | <a href="#">1182</a>  | <a href="#">3</a>   | 23.25  | .13    | - | 3.23E-07 | 9.03E-06 |
| ↳signaling receptor activity                                                          | <a href="#">1282</a>  | <a href="#">8</a>   | 25.22  | .32    | - | 9.72E-05 | 1.05E-03 |
| ↳molecular transducer activity                                                        | <a href="#">1349</a>  | <a href="#">8</a>   | 26.54  | .30    | - | 3.79E-05 | 4.57E-04 |
| DNA-binding transcription factor activity, RNA polymerase II-specific                 | <a href="#">366</a>   | <a href="#">0</a>   | 7.20   | < 0.01 | - | 1.58E-03 | 1.29E-02 |
| ↳DNA-binding transcription factor activity                                            | <a href="#">618</a>   | <a href="#">0</a>   | 12.16  | < 0.01 | - | 9.09E-06 | 1.46E-04 |
| ↳transcription regulator activity                                                     | <a href="#">772</a>   | <a href="#">2</a>   | 15.19  | .13    | - | 5.07E-05 | 5.73E-04 |
| protein serine/threonine kinase activity                                              | <a href="#">374</a>   | <a href="#">0</a>   | 7.36   | < 0.01 | - | 1.03E-03 | 8.82E-03 |



**PANTHER 15.0 released!**

Analysis Summary: Please report in publication [vWAT-MSC secretome from HFD mice](#)

**Analysis Type:** PANTHER Overrepresentation Test (Released 20190711)

---

**Annotation Version and Release Date:** PANTHER version 15 Released 2020-02-14

---

**Analyzed List:** Client Text Box Input (Mus musculus) Change

---

**Reference List:** Mus musculus (all genes in database) Change

---

**Annotation Data Set:** PANTHER GO-Slim Biological Process ?

---

**Test Type:**  Fisher's Exact  Binomial

---

**Correction:**  Calculate False Discovery Rate  Use the Bonferroni correction for multiple testing ?  No correction

Results ?

|                               | Reference list                     | Client Text Box Input          |
|-------------------------------|------------------------------------|--------------------------------|
| Uniquely Mapped IDs:          | <a href="#">22265</a> out of 22265 | <a href="#">377</a> out of 378 |
| Unmapped IDs:                 | <a href="#">0</a>                  | <a href="#">3</a>              |
| Multiple mapping information: | <a href="#">0</a>                  | <a href="#">10</a>             |

Export Table XML with user input ids JSON with user input ids View: -- Please select a chart to display --

Displaying only results for FDR P < 0.05, [click here to display all results](#)

|                                                                          | Mus musculus (REF)   | Client Text Box Input (Hierarchy NEW! <span>?</span> ) |
|--------------------------------------------------------------------------|----------------------|--------------------------------------------------------|
|                                                                          | #                    | # expected Fold Enrichment +/- raw P value FDR         |
| <a href="#">PANTHER GO-Slim Biological Process</a>                       |                      |                                                        |
| <a href="#">tissue remodeling</a>                                        | <a href="#">3</a>    | <a href="#">2</a> .05 39.27 + 2.69E-03 3.70E-02        |
| <a href="#">collagen fibril organization</a>                             | <a href="#">11</a>   | <a href="#">5</a> .19 26.77 + 4.74E-06 2.08E-04        |
| ↳ <a href="#">supramolecular fiber organization</a>                      | <a href="#">236</a>  | <a href="#">28</a> 4.01 6.99 + 8.37E-15 1.73E-11       |
| ↳ <a href="#">cellular component organization</a>                        | <a href="#">2396</a> | <a href="#">64</a> 40.68 1.57 + 3.14E-04 6.89E-03      |
| ↳ <a href="#">cellular process</a>                                       | <a href="#">7925</a> | <a href="#">197</a> 134.55 1.46 + 8.54E-11 1.26E-08    |
| ↳ <a href="#">cellular component organization or biogenesis</a>          | <a href="#">2526</a> | <a href="#">66</a> 42.88 1.54 + 4.38E-04 9.12E-03      |
| ↳ <a href="#">extracellular matrix organization</a>                      | <a href="#">56</a>   | <a href="#">11</a> .95 11.57 + 1.35E-08 1.47E-06       |
| ↳ <a href="#">extracellular structure organization</a>                   | <a href="#">63</a>   | <a href="#">11</a> 1.07 10.28 + 3.96E-08 3.89E-06      |
| ↳ <a href="#">protein-containing complex subunit organization</a>        | <a href="#">481</a>  | <a href="#">27</a> 8.17 3.31 + 1.43E-07 1.05E-05       |
| <a href="#">response to reactive oxygen species</a>                      | <a href="#">11</a>   | <a href="#">5</a> .19 26.77 + 4.74E-06 2.04E-04        |
| ↳ <a href="#">response to oxidative stress</a>                           | <a href="#">25</a>   | <a href="#">9</a> .42 21.20 + 3.32E-09 4.03E-07        |
| ↳ <a href="#">response to stress</a>                                     | <a href="#">972</a>  | <a href="#">30</a> 16.50 1.82 + 2.17E-03 3.14E-02      |
| <a href="#">cellular response to oxidative stress</a>                    | <a href="#">16</a>   | <a href="#">7</a> .27 25.77 + 6.66E-08 5.50E-06        |
| ↳ <a href="#">cellular response to stress</a>                            | <a href="#">444</a>  | <a href="#">19</a> 7.54 2.52 + 3.21E-04 6.97E-03       |
| <a href="#">IMP metabolic process</a>                                    | <a href="#">7</a>    | <a href="#">3</a> .12 25.24 + 5.08E-04 9.70E-03        |
| ↳ <a href="#">nucleoside monophosphate metabolic process</a>             | <a href="#">14</a>   | <a href="#">3</a> .24 12.62 + 2.64E-03 3.68E-02        |
| ↳ <a href="#">nucleoside phosphate metabolic process</a>                 | <a href="#">168</a>  | <a href="#">9</a> 2.85 3.16 + 3.00E-03 4.11E-02        |
| ↳ <a href="#">nucleobase-containing small molecule metabolic process</a> | <a href="#">202</a>  | <a href="#">11</a> 3.43 3.21 + 9.54E-04 1.55E-02       |
| ↳ <a href="#">metabolic process</a>                                      | <a href="#">4857</a> | <a href="#">119</a> 82.46 1.44 + 1.85E-05 6.58E-04     |
| ↳ <a href="#">cellular metabolic process</a>                             | <a href="#">4357</a> | <a href="#">111</a> 73.97 1.50 + 6.11E-06 2.47E-04     |
| ↳ <a href="#">organic substance metabolic process</a>                    | <a href="#">4680</a> | <a href="#">111</a> 79.45 1.40 + 1.68E-04 4.13E-03     |
| ↳ <a href="#">primary metabolic process</a>                              | <a href="#">4458</a> | <a href="#">102</a> 75.68 1.35 + 1.19E-03 1.88E-02     |
| ↳ <a href="#">nitrogen compound metabolic process</a>                    | <a href="#">4212</a> | <a href="#">103</a> 71.51 1.44 + 9.10E-05 2.38E-03     |

|                                                           |                      |                    |       |       |   |          |          |
|-----------------------------------------------------------|----------------------|--------------------|-------|-------|---|----------|----------|
| ↳organophosphate metabolic process                        | <a href="#">312</a>  | <a href="#">13</a> | 5.30  | 2.45  | + | 3.40E-03 | 4.53E-02 |
| ↳purine ribonucleotide metabolic process                  | <a href="#">130</a>  | <a href="#">9</a>  | 2.21  | 4.08  | + | 5.58E-04 | 1.05E-02 |
| ↳purine nucleotide metabolic process                      | <a href="#">138</a>  | <a href="#">9</a>  | 2.34  | 3.84  | + | 8.35E-04 | 1.39E-02 |
| ↳purine-containing compound metabolic process             | <a href="#">152</a>  | <a href="#">9</a>  | 2.58  | 3.49  | + | 1.58E-03 | 2.36E-02 |
| ↳organonitrogen compound metabolic process                | <a href="#">2527</a> | <a href="#">89</a> | 42.90 | 2.07  | + | 3.60E-11 | 6.75E-09 |
| ↳nucleotide metabolic process                             | <a href="#">163</a>  | <a href="#">9</a>  | 2.77  | 3.25  | + | 2.48E-03 | 3.51E-02 |
| ↳ribonucleotide metabolic process                         | <a href="#">135</a>  | <a href="#">9</a>  | 2.29  | 3.93  | + | 7.20E-04 | 1.24E-02 |
| ↳ribose phosphate metabolic process                       | <a href="#">143</a>  | <a href="#">9</a>  | 2.43  | 3.71  | + | 1.06E-03 | 1.68E-02 |
| glucose 6-phosphate metabolic process                     | <a href="#">9</a>    | <a href="#">3</a>  | .15   | 19.63 | + | 9.08E-04 | 1.49E-02 |
| bone morphogenesis                                        | <a href="#">14</a>   | <a href="#">4</a>  | .24   | 16.83 | + | 1.94E-04 | 4.66E-03 |
| ↳bone development                                         | <a href="#">21</a>   | <a href="#">4</a>  | .36   | 11.22 | + | 7.33E-04 | 1.25E-02 |
| ↳skeletal system development                              | <a href="#">54</a>   | <a href="#">5</a>  | .92   | 5.45  | + | 3.02E-03 | 4.10E-02 |
| glycolytic process                                        | <a href="#">20</a>   | <a href="#">5</a>  | .34   | 14.73 | + | 5.09E-05 | 1.50E-03 |
| ↳generation of precursor metabolites and energy           | <a href="#">103</a>  | <a href="#">11</a> | 1.75  | 6.29  | + | 3.36E-06 | 1.61E-04 |
| ↳nucleotide phosphorylation                               | <a href="#">20</a>   | <a href="#">5</a>  | .34   | 14.73 | + | 5.09E-05 | 1.48E-03 |
| ↳organic substance catabolic process                      | <a href="#">703</a>  | <a href="#">46</a> | 11.94 | 3.85  | + | 2.58E-14 | 2.67E-11 |
| ↳catabolic process                                        | <a href="#">888</a>  | <a href="#">52</a> | 15.08 | 3.45  | + | 3.02E-14 | 2.08E-11 |
| ↳carbohydrate metabolic process                           | <a href="#">133</a>  | <a href="#">8</a>  | 2.26  | 3.54  | + | 2.59E-03 | 3.63E-02 |
| ↳ATP metabolic process                                    | <a href="#">56</a>   | <a href="#">6</a>  | .95   | 6.31  | + | 5.82E-04 | 1.04E-02 |
| chondrocyte differentiation                               | <a href="#">17</a>   | <a href="#">4</a>  | .29   | 13.86 | + | 3.65E-04 | 7.85E-03 |
| ↳cartilage development                                    | <a href="#">18</a>   | <a href="#">4</a>  | .31   | 13.09 | + | 4.41E-04 | 8.92E-03 |
| ↳connective tissue development                            | <a href="#">18</a>   | <a href="#">4</a>  | .31   | 13.09 | + | 4.41E-04 | 9.01E-03 |
| ↳tissue development                                       | <a href="#">179</a>  | <a href="#">11</a> | 3.04  | 3.62  | + | 3.69E-04 | 7.76E-03 |
| superoxide metabolic process                              | <a href="#">18</a>   | <a href="#">4</a>  | .31   | 13.09 | + | 4.41E-04 | 9.10E-03 |
| ↳reactive oxygen species metabolic process                | <a href="#">40</a>   | <a href="#">6</a>  | .68   | 8.84  | + | 1.11E-04 | 2.79E-03 |
| Arp2/3 complex-mediated actin nucleation                  | <a href="#">18</a>   | <a href="#">4</a>  | .31   | 13.09 | + | 4.41E-04 | 8.83E-03 |
| ↳positive regulation of actin filament polymerization     | <a href="#">34</a>   | <a href="#">4</a>  | .58   | 6.93  | + | 3.60E-03 | 4.74E-02 |
| ↳regulation of actin filament polymerization              | <a href="#">71</a>   | <a href="#">10</a> | 1.21  | 8.30  | + | 9.78E-07 | 5.77E-05 |
| ↳regulation of protein polymerization                     | <a href="#">75</a>   | <a href="#">10</a> | 1.27  | 7.85  | + | 1.54E-06 | 7.92E-05 |
| ↳regulation of protein complex assembly                   | <a href="#">94</a>   | <a href="#">10</a> | 1.60  | 6.27  | + | 9.68E-06 | 3.70E-04 |
| ↳regulation of cellular component biogenesis              | <a href="#">140</a>  | <a href="#">11</a> | 2.38  | 4.63  | + | 4.85E-05 | 1.45E-03 |
| ↳regulation of actin polymerization or depolymerization   | <a href="#">73</a>   | <a href="#">11</a> | 1.24  | 8.88  | + | 1.52E-07 | 1.04E-05 |
| ↳regulation of actin filament organization                | <a href="#">81</a>   | <a href="#">11</a> | 1.38  | 8.00  | + | 3.89E-07 | 2.51E-05 |
| ↳regulation of actin cytoskeleton organization            | <a href="#">106</a>  | <a href="#">11</a> | 1.80  | 6.11  | + | 4.33E-06 | 1.99E-04 |
| ↳regulation of actin filament-based process               | <a href="#">107</a>  | <a href="#">12</a> | 1.82  | 6.61  | + | 7.51E-07 | 4.56E-05 |
| ↳regulation of cytoskeleton organization                  | <a href="#">146</a>  | <a href="#">12</a> | 2.48  | 4.84  | + | 1.46E-05 | 5.27E-04 |
| ↳regulation of organelle organization                     | <a href="#">264</a>  | <a href="#">13</a> | 4.48  | 2.90  | + | 8.31E-04 | 1.40E-02 |
| ↳regulation of supramolecular fiber organization          | <a href="#">90</a>   | <a href="#">11</a> | 1.53  | 7.20  | + | 1.01E-06 | 5.62E-05 |
| ↳regulation of actin filament length                      | <a href="#">73</a>   | <a href="#">11</a> | 1.24  | 8.88  | + | 1.52E-07 | 1.08E-05 |
| ↳regulation of cellular component size                    | <a href="#">108</a>  | <a href="#">11</a> | 1.83  | 6.00  | + | 5.11E-06 | 2.15E-04 |
| ↳regulation of anatomical structure size                  | <a href="#">120</a>  | <a href="#">12</a> | 2.04  | 5.89  | + | 2.27E-06 | 1.15E-04 |
| ↳regulation of biological quality                         | <a href="#">905</a>  | <a href="#">30</a> | 15.36 | 1.95  | + | 6.14E-04 | 1.09E-02 |
| ↳positive regulation of supramolecular fiber organization | <a href="#">48</a>   | <a href="#">6</a>  | .81   | 7.36  | + | 2.73E-04 | 6.20E-03 |
| ↳positive regulation of cellular component organization   | <a href="#">136</a>  | <a href="#">10</a> | 2.31  | 4.33  | + | 1.77E-04 | 4.29E-03 |
| ↳positive regulation of cytoskeleton organization         | <a href="#">49</a>   | <a href="#">6</a>  | .83   | 7.21  | + | 3.02E-04 | 6.79E-03 |
| ↳positive regulation of organelle organization            | <a href="#">79</a>   | <a href="#">8</a>  | 1.34  | 5.96  | + | 1.04E-04 | 2.65E-03 |
| ↳actin filament organization                              | <a href="#">159</a>  | <a href="#">21</a> | 2.70  | 7.78  | + | 3.22E-12 | 1.33E-09 |
| ↳actin cytoskeleton organization                          | <a href="#">238</a>  | <a href="#">24</a> | 4.04  | 5.94  | + | 1.70E-11 | 3.50E-09 |
| ↳cytoskeleton organization                                | <a href="#">560</a>  | <a href="#">30</a> | 9.51  | 3.16  | + | 7.49E-08 | 5.95E-06 |
| ↳actin filament-based process                             | <a href="#">246</a>  | <a href="#">25</a> | 4.18  | 5.99  | + | 5.45E-12 | 1.87E-09 |
| response to toxic substance                               | <a href="#">32</a>   | <a href="#">6</a>  | .54   | 11.04 | + | 3.66E-05 | 1.11E-03 |

|                                                                   |      |    |       |       |   |          |          |
|-------------------------------------------------------------------|------|----|-------|-------|---|----------|----------|
| developmental growth                                              | 51   | 8  | .87   | 9.24  | + | 5.91E-06 | 2.44E-04 |
| ↳growth                                                           | 55   | 8  | .93   | 8.57  | + | 9.74E-06 | 3.65E-04 |
| glucose metabolic process                                         | 26   | 4  | .44   | 9.06  | + | 1.49E-03 | 2.27E-02 |
| chaperone-mediated protein folding                                | 26   | 4  | .44   | 9.06  | + | 1.49E-03 | 2.26E-02 |
| ↳protein folding                                                  | 81   | 15 | 1.38  | 10.91 | + | 6.34E-11 | 1.09E-08 |
| muscle contraction                                                | 43   | 6  | .73   | 8.22  | + | 1.59E-04 | 3.95E-03 |
| ↳muscle system process                                            | 45   | 6  | .76   | 7.85  | + | 1.99E-04 | 4.71E-03 |
| actin filament polymerization                                     | 74   | 10 | 1.26  | 7.96  | + | 1.38E-06 | 7.28E-05 |
| ↳protein polymerization                                           | 89   | 10 | 1.51  | 6.62  | + | 6.22E-06 | 2.47E-04 |
| ↳cellular protein-containing complex assembly                     | 367  | 19 | 6.23  | 3.05  | + | 3.00E-05 | 1.00E-03 |
| ↳protein-containing complex assembly                              | 394  | 19 | 6.69  | 2.84  | + | 7.43E-05 | 1.97E-03 |
| ↳cellular component assembly                                      | 734  | 26 | 12.46 | 2.09  | + | 7.09E-04 | 1.24E-02 |
| ↳cellular component biogenesis                                    | 867  | 28 | 14.72 | 1.90  | + | 1.87E-03 | 2.75E-02 |
| ↳actin polymerization or depolymerization                         | 79   | 12 | 1.34  | 8.95  | + | 3.80E-08 | 3.92E-06 |
| actin filament bundle assembly                                    | 31   | 4  | .53   | 7.60  | + | 2.66E-03 | 3.68E-02 |
| ↳actin filament bundle organization                               | 33   | 4  | .56   | 7.14  | + | 3.27E-03 | 4.38E-02 |
| ribosomal small subunit biogenesis                                | 51   | 6  | .87   | 6.93  | + | 3.68E-04 | 7.83E-03 |
| response to inorganic substance                                   | 54   | 6  | .92   | 6.54  | + | 4.87E-04 | 9.40E-03 |
| negative regulation of endopeptidase activity                     | 82   | 9  | 1.39  | 6.46  | + | 2.15E-05 | 7.40E-04 |
| ↳negative regulation of peptidase activity                        | 87   | 9  | 1.48  | 6.09  | + | 3.31E-05 | 1.03E-03 |
| ↳negative regulation of hydrolase activity                        | 102  | 10 | 1.73  | 5.77  | + | 1.86E-05 | 6.52E-04 |
| ↳regulation of hydrolase activity                                 | 287  | 14 | 4.87  | 2.87  | + | 5.80E-04 | 1.05E-02 |
| ↳negative regulation of catalytic activity                        | 169  | 11 | 2.87  | 3.83  | + | 2.32E-04 | 5.32E-03 |
| ↳negative regulation of molecular function                        | 196  | 11 | 3.33  | 3.31  | + | 7.55E-04 | 1.28E-02 |
| ↳regulation of peptidase activity                                 | 112  | 11 | 1.90  | 5.79  | + | 7.04E-06 | 2.74E-04 |
| ↳regulation of proteolysis                                        | 155  | 12 | 2.63  | 4.56  | + | 2.54E-05 | 8.58E-04 |
| ↳negative regulation of proteolysis                               | 88   | 9  | 1.49  | 6.02  | + | 3.59E-05 | 1.11E-03 |
| ↳negative regulation of cellular protein metabolic process        | 164  | 10 | 2.78  | 3.59  | + | 7.14E-04 | 1.24E-02 |
| ↳negative regulation of protein metabolic process                 | 168  | 11 | 2.85  | 3.86  | + | 2.21E-04 | 5.12E-03 |
| ↳regulation of endopeptidase activity                             | 107  | 11 | 1.82  | 6.06  | + | 4.71E-06 | 2.11E-04 |
| response to endoplasmic reticulum stress                          | 65   | 6  | 1.10  | 5.44  | + | 1.20E-03 | 1.87E-02 |
| transition metal ion homeostasis                                  | 55   | 5  | .93   | 5.35  | + | 3.25E-03 | 4.38E-02 |
| proteasome-mediated ubiquitin-dependent protein catabolic process | 194  | 17 | 3.29  | 5.16  | + | 1.06E-07 | 8.08E-06 |
| ↳proteasomal protein catabolic process                            | 205  | 18 | 3.48  | 5.17  | + | 4.32E-08 | 4.06E-06 |
| ↳proteolysis involved in cellular protein catabolic process       | 331  | 26 | 5.62  | 4.63  | + | 3.91E-10 | 5.37E-08 |
| ↳proteolysis                                                      | 693  | 41 | 11.77 | 3.48  | + | 1.49E-11 | 3.84E-09 |
| ↳protein metabolic process                                        | 2115 | 68 | 35.91 | 1.89  | + | 4.04E-07 | 2.53E-05 |
| ↳cellular protein catabolic process                               | 333  | 26 | 5.65  | 4.60  | + | 4.41E-10 | 5.68E-08 |
| ↳cellular macromolecule catabolic process                         | 429  | 28 | 7.28  | 3.84  | + | 4.00E-09 | 4.59E-07 |
| ↳macromolecule catabolic process                                  | 463  | 32 | 7.86  | 4.07  | + | 7.63E-11 | 1.21E-08 |
| ↳cellular catabolic process                                       | 765  | 44 | 12.99 | 3.39  | + | 6.11E-12 | 1.80E-09 |
| ↳protein catabolic process                                        | 355  | 29 | 6.03  | 4.81  | + | 1.53E-11 | 3.51E-09 |
| ↳organonitrogen compound catabolic process                        | 457  | 35 | 7.76  | 4.51  | + | 6.20E-13 | 3.20E-10 |
| ↳cellular protein metabolic process                               | 1711 | 60 | 29.05 | 2.07  | + | 1.77E-07 | 1.18E-05 |
| ↳ubiquitin-dependent protein catabolic process                    | 276  | 18 | 4.69  | 3.84  | + | 2.54E-06 | 1.25E-04 |
| ↳modification-dependent protein catabolic process                 | 285  | 19 | 4.84  | 3.93  | + | 9.84E-07 | 5.64E-05 |
| ↳modification-dependent macromolecule catabolic process           | 290  | 19 | 4.92  | 3.86  | + | 1.25E-06 | 6.82E-05 |
| maintenance of location                                           | 82   | 6  | 1.39  | 4.31  | + | 3.57E-03 | 4.73E-02 |
| oxidation-reduction process                                       | 220  | 15 | 3.74  | 4.02  | + | 1.06E-05 | 3.91E-04 |
| cofactor metabolic process                                        | 168  | 10 | 2.85  | 3.51  | + | 8.51E-04 | 1.40E-02 |
| cell migration                                                    | 255  | 15 | 4.33  | 3.46  | + | 5.35E-05 | 1.49E-03 |
| ↳cell motility                                                    | 285  | 16 | 4.84  | 3.31  | + | 5.15E-05 | 1.46E-03 |



|                                                                                 |                       |                     |        |      |   |          |          |
|---------------------------------------------------------------------------------|-----------------------|---------------------|--------|------|---|----------|----------|
| <a href="#">↳locomotion</a>                                                     | <a href="#">356</a>   | <a href="#">16</a>  | 6.04   | 2.65 | + | 5.67E-04 | 1.06E-02 |
| <a href="#">↳localization of cell</a>                                           | <a href="#">285</a>   | <a href="#">16</a>  | 4.84   | 3.31 | + | 5.15E-05 | 1.48E-03 |
| <a href="#">translational elongation</a>                                        | <a href="#">216</a>   | <a href="#">12</a>  | 3.67   | 3.27 | + | 4.80E-04 | 9.43E-03 |
| <a href="#">↳translation</a>                                                    | <a href="#">216</a>   | <a href="#">12</a>  | 3.67   | 3.27 | + | 4.80E-04 | 9.35E-03 |
| <a href="#">↳peptide biosynthetic process</a>                                   | <a href="#">219</a>   | <a href="#">12</a>  | 3.72   | 3.23 | + | 5.39E-04 | 1.02E-02 |
| <a href="#">↳organonitrogen compound biosynthetic process</a>                   | <a href="#">589</a>   | <a href="#">21</a>  | 10.00  | 2.10 | + | 1.87E-03 | 2.74E-02 |
| <a href="#">↳amide biosynthetic process</a>                                     | <a href="#">252</a>   | <a href="#">12</a>  | 4.28   | 2.80 | + | 1.71E-03 | 2.53E-02 |
| <a href="#">↳cellular amide metabolic process</a>                               | <a href="#">369</a>   | <a href="#">18</a>  | 6.26   | 2.87 | + | 9.98E-05 | 2.57E-03 |
| <a href="#">↳peptide metabolic process</a>                                      | <a href="#">286</a>   | <a href="#">18</a>  | 4.86   | 3.71 | + | 4.06E-06 | 1.90E-04 |
| Unclassified                                                                    | <a href="#">12808</a> | <a href="#">164</a> | 217.45 | .75  | - | 5.51E-08 | 4.94E-06 |
| <a href="#">regulation of transcription by RNA polymerase II</a>                | <a href="#">745</a>   | <a href="#">2</a>   | 12.65  | .16  | - | 6.49E-04 | 1.14E-02 |
| <a href="#">↳regulation of transcription, DNA-templated</a>                     | <a href="#">1117</a>  | <a href="#">4</a>   | 18.96  | .21  | - | 6.13E-05 | 1.69E-03 |
| <a href="#">↳regulation of gene expression</a>                                  | <a href="#">1368</a>  | <a href="#">9</a>   | 23.22  | .39  | - | 1.04E-03 | 1.68E-02 |
| <a href="#">↳regulation of nucleic acid-templated transcription</a>             | <a href="#">1117</a>  | <a href="#">4</a>   | 18.96  | .21  | - | 6.13E-05 | 1.66E-03 |
| <a href="#">↳regulation of RNA biosynthetic process</a>                         | <a href="#">1117</a>  | <a href="#">4</a>   | 18.96  | .21  | - | 6.13E-05 | 1.64E-03 |
| <a href="#">↳regulation of RNA metabolic process</a>                            | <a href="#">1222</a>  | <a href="#">8</a>   | 20.75  | .39  | - | 1.91E-03 | 2.78E-02 |
| <a href="#">↳regulation of nucleobase-containing compound metabolic process</a> | <a href="#">1263</a>  | <a href="#">8</a>   | 21.44  | .37  | - | 1.44E-03 | 2.22E-02 |
| <a href="#">↳regulation of cellular biosynthetic process</a>                    | <a href="#">1234</a>  | <a href="#">7</a>   | 20.95  | .33  | - | 5.78E-04 | 1.07E-02 |
| <a href="#">↳regulation of biosynthetic process</a>                             | <a href="#">1240</a>  | <a href="#">7</a>   | 21.05  | .33  | - | 5.78E-04 | 1.06E-02 |
| <a href="#">↳regulation of macromolecule biosynthetic process</a>               | <a href="#">1223</a>  | <a href="#">6</a>   | 20.76  | .29  | - | 2.14E-04 | 5.03E-03 |
| <a href="#">↳regulation of cellular macromolecule biosynthetic process</a>      | <a href="#">1216</a>  | <a href="#">6</a>   | 20.64  | .29  | - | 3.07E-04 | 6.82E-03 |
| <a href="#">transcription by RNA polymerase II</a>                              | <a href="#">772</a>   | <a href="#">2</a>   | 13.11  | .15  | - | 4.63E-04 | 9.18E-03 |
| <a href="#">↳transcription, DNA-templated</a>                                   | <a href="#">1159</a>  | <a href="#">4</a>   | 19.68  | .20  | - | 3.04E-05 | 9.80E-04 |
| <a href="#">↳nucleic acid-templated transcription</a>                           | <a href="#">1159</a>  | <a href="#">4</a>   | 19.68  | .20  | - | 3.04E-05 | 9.95E-04 |
| <a href="#">↳RNA biosynthetic process</a>                                       | <a href="#">1166</a>  | <a href="#">4</a>   | 19.80  | .20  | - | 3.06E-05 | 9.72E-04 |
| <a href="#">↳nucleobase-containing compound biosynthetic process</a>            | <a href="#">1376</a>  | <a href="#">9</a>   | 23.36  | .39  | - | 1.05E-03 | 1.68E-02 |
| <a href="#">↳aromatic compound biosynthetic process</a>                         | <a href="#">1399</a>  | <a href="#">10</a>  | 23.75  | .42  | - | 2.41E-03 | 3.43E-02 |
| <a href="#">↳organic cyclic compound biosynthetic process</a>                   | <a href="#">1433</a>  | <a href="#">10</a>  | 24.33  | .41  | - | 1.34E-03 | 2.08E-02 |
| <a href="#">↳heterocycle biosynthetic process</a>                               | <a href="#">1399</a>  | <a href="#">10</a>  | 23.75  | .42  | - | 2.41E-03 | 3.46E-02 |
| <a href="#">↳nucleic acid metabolic process</a>                                 | <a href="#">1911</a>  | <a href="#">16</a>  | 32.44  | .49  | - | 1.49E-03 | 2.25E-02 |

**PANTHER 15.0 released!**

Analysis Summary: Please report in publication [SWAT-MSC secretome from HFD mice](#)

**Analysis Type:** PANTHER Overrepresentation Test (Released 20190711)

---

**Annotation Version and Release Date:** PANTHER version 15 Released 2020-02-14

---

**Analyzed List:** Client Text Box Input (Mus musculus) Change

---

**Reference List:** Mus musculus (all genes in database) Change

---

**Annotation Data Set:** PANTHER GO-Slim Biological Process ?

---

**Test Type:**  Fisher's Exact  Binomial

---

**Correction:**  Calculate False Discovery Rate  Use the Bonferroni correction for multiple testing ?  No correction

Results ?

|                               | Reference list                     | Client Text Box Input          |
|-------------------------------|------------------------------------|--------------------------------|
| Uniquely Mapped IDs:          | <a href="#">22265</a> out of 22265 | <a href="#">506</a> out of 505 |
| Unmapped IDs:                 | <a href="#">0</a>                  | <a href="#">4</a>              |
| Multiple mapping information: | <a href="#">0</a>                  | <a href="#">8</a>              |

Export Table XML with user input ids JSON with user input ids View: -- Please select a chart to display --

Displaying only results for FDR P < 0.05, [click here to display all results](#)

|                                                                          | Mus musculus (REF)   | Client Text Box Input (Hierarchy NEW! <span>?</span> ) |          |                 |     |             |          |
|--------------------------------------------------------------------------|----------------------|--------------------------------------------------------|----------|-----------------|-----|-------------|----------|
|                                                                          | #                    | #                                                      | expected | Fold Enrichment | +/- | raw P value | FDR      |
| <a href="#">PANTHER GO-Slim Biological Process</a>                       |                      |                                                        |          |                 |     |             |          |
| <a href="#">tissue remodeling</a>                                        | <a href="#">3</a>    | <a href="#">2</a>                                      | .07      | 29.39           | +   | 4.70E-03    | 4.23E-02 |
| <a href="#">collagen fibril organization</a>                             | <a href="#">11</a>   | <a href="#">5</a>                                      | .25      | 20.04           | +   | 1.88E-05    | 4.67E-04 |
| ↳ <a href="#">supramolecular fiber organization</a>                      | <a href="#">236</a>  | <a href="#">30</a>                                     | 5.35     | 5.60            | +   | 3.10E-13    | 3.20E-10 |
| ↳ <a href="#">cellular component organization</a>                        | <a href="#">2396</a> | <a href="#">82</a>                                     | 54.34    | 1.51            | +   | 2.14E-04    | 3.62E-03 |
| ↳ <a href="#">cellular process</a>                                       | <a href="#">7925</a> | <a href="#">251</a>                                    | 179.75   | 1.40            | +   | 1.83E-10    | 7.54E-08 |
| ↳ <a href="#">cellular component organization or biogenesis</a>          | <a href="#">2526</a> | <a href="#">85</a>                                     | 57.29    | 1.48            | +   | 2.95E-04    | 4.69E-03 |
| ↳ <a href="#">extracellular matrix organization</a>                      | <a href="#">56</a>   | <a href="#">13</a>                                     | 1.27     | 10.23           | +   | 3.36E-09    | 5.33E-07 |
| ↳ <a href="#">extracellular structure organization</a>                   | <a href="#">63</a>   | <a href="#">13</a>                                     | 1.43     | 9.10            | +   | 1.15E-08    | 9.90E-07 |
| ↳ <a href="#">protein-containing complex subunit organization</a>        | <a href="#">481</a>  | <a href="#">33</a>                                     | 10.91    | 3.02            | +   | 5.70E-08    | 3.36E-06 |
| <a href="#">positive chemotaxis</a>                                      | <a href="#">7</a>    | <a href="#">3</a>                                      | .16      | 18.90           | +   | 1.16E-03    | 1.46E-02 |
| ↳ <a href="#">chemotaxis</a>                                             | <a href="#">186</a>  | <a href="#">12</a>                                     | 4.22     | 2.84            | +   | 1.63E-03    | 1.86E-02 |
| ↳ <a href="#">response to chemical</a>                                   | <a href="#">915</a>  | <a href="#">39</a>                                     | 20.75    | 1.88            | +   | 2.71E-04    | 4.40E-03 |
| ↳ <a href="#">taxis</a>                                                  | <a href="#">186</a>  | <a href="#">12</a>                                     | 4.22     | 2.84            | +   | 1.63E-03    | 1.87E-02 |
| ↳ <a href="#">locomotion</a>                                             | <a href="#">356</a>  | <a href="#">28</a>                                     | 8.07     | 3.47            | +   | 4.27E-08    | 2.84E-06 |
| <a href="#">sprouting angiogenesis</a>                                   | <a href="#">7</a>    | <a href="#">3</a>                                      | .16      | 18.90           | +   | 1.16E-03    | 1.45E-02 |
| ↳ <a href="#">angiogenesis</a>                                           | <a href="#">38</a>   | <a href="#">5</a>                                      | .86      | 5.80            | +   | 2.53E-03    | 2.62E-02 |
| ↳ <a href="#">anatomical structure morphogenesis</a>                     | <a href="#">450</a>  | <a href="#">25</a>                                     | 10.21    | 2.45            | +   | 8.88E-05    | 1.70E-03 |
| ↳ <a href="#">blood vessel morphogenesis</a>                             | <a href="#">39</a>   | <a href="#">5</a>                                      | .88      | 5.65            | +   | 2.80E-03    | 2.88E-02 |
| ↳ <a href="#">blood vessel development</a>                               | <a href="#">42</a>   | <a href="#">5</a>                                      | .95      | 5.25            | +   | 3.75E-03    | 3.63E-02 |
| ↳ <a href="#">vasculature development</a>                                | <a href="#">45</a>   | <a href="#">5</a>                                      | 1.02     | 4.90            | +   | 4.90E-03    | 4.38E-02 |
| ↳ <a href="#">cardiovascular system development</a>                      | <a href="#">46</a>   | <a href="#">5</a>                                      | 1.04     | 4.79            | +   | 5.34E-03    | 4.61E-02 |
| <a href="#">IMP metabolic process</a>                                    | <a href="#">7</a>    | <a href="#">3</a>                                      | .16      | 18.90           | +   | 1.16E-03    | 1.44E-02 |
| ↳ <a href="#">nucleoside monophosphate metabolic process</a>             | <a href="#">14</a>   | <a href="#">3</a>                                      | .32      | 9.45            | +   | 5.85E-03    | 4.85E-02 |
| ↳ <a href="#">nucleobase-containing small molecule metabolic process</a> | <a href="#">202</a>  | <a href="#">13</a>                                     | 4.58     | 2.84            | +   | 1.08E-03    | 1.39E-02 |
| ↳ <a href="#">small molecule metabolic process</a>                       | <a href="#">587</a>  | <a href="#">29</a>                                     | 13.31    | 2.18            | +   | 1.43E-04    | 2.55E-03 |

|                                                                           |                      |                     |        |       |   |          |          |
|---------------------------------------------------------------------------|----------------------|---------------------|--------|-------|---|----------|----------|
| <a href="#">↳metabolic process</a>                                        | <a href="#">4857</a> | <a href="#">141</a> | 110.16 | 1.28  | + | 1.58E-03 | 1.83E-02 |
| <a href="#">↳nucleobase-containing compound metabolic process</a>         | <a href="#">2112</a> | <a href="#">27</a>  | 47.90  | .56   | - | 1.13E-03 | 1.43E-02 |
| <a href="#">↳heterocycle metabolic process</a>                            | <a href="#">2151</a> | <a href="#">28</a>  | 48.79  | .57   | - | 1.25E-03 | 1.54E-02 |
| <a href="#">↳cellular metabolic process</a>                               | <a href="#">4357</a> | <a href="#">131</a> | 98.82  | 1.33  | + | 5.47E-04 | 7.84E-03 |
| <a href="#">↳organic cyclic compound metabolic process</a>                | <a href="#">2218</a> | <a href="#">29</a>  | 50.31  | .58   | - | 1.12E-03 | 1.42E-02 |
| <a href="#">↳organic substance metabolic process</a>                      | <a href="#">4680</a> | <a href="#">134</a> | 106.15 | 1.26  | + | 3.44E-03 | 3.37E-02 |
| <a href="#">↳nitrogen compound metabolic process</a>                      | <a href="#">4212</a> | <a href="#">121</a> | 95.53  | 1.27  | + | 5.84E-03 | 4.86E-02 |
| <a href="#">↳cellular aromatic compound metabolic process</a>             | <a href="#">2163</a> | <a href="#">29</a>  | 49.06  | .59   | - | 2.17E-03 | 2.35E-02 |
| <a href="#">↳purine ribonucleotide metabolic process</a>                  | <a href="#">130</a>  | <a href="#">9</a>   | 2.95   | 3.05  | + | 3.90E-03 | 3.71E-02 |
| <a href="#">↳purine nucleotide metabolic process</a>                      | <a href="#">138</a>  | <a href="#">9</a>   | 3.13   | 2.88  | + | 5.62E-03 | 4.75E-02 |
| <a href="#">↳purine-containing compound metabolic process</a>             | <a href="#">152</a>  | <a href="#">10</a>  | 3.45   | 2.90  | + | 3.40E-03 | 3.35E-02 |
| <a href="#">↳organonitrogen compound metabolic process</a>                | <a href="#">2527</a> | <a href="#">110</a> | 57.32  | 1.92  | + | 4.94E-11 | 2.55E-08 |
| <a href="#">↳ribonucleotide metabolic process</a>                         | <a href="#">135</a>  | <a href="#">9</a>   | 3.06   | 2.94  | + | 4.92E-03 | 4.35E-02 |
| <a href="#">positive regulation of epithelial cell proliferation</a>      | <a href="#">8</a>    | <a href="#">3</a>   | .18    | 16.53 | + | 1.57E-03 | 1.83E-02 |
| <a href="#">actin filament depolymerization</a>                           | <a href="#">11</a>   | <a href="#">4</a>   | .25    | 16.03 | + | 2.69E-04 | 4.40E-03 |
| <a href="#">↳actin polymerization or depolymerization</a>                 | <a href="#">79</a>   | <a href="#">15</a>  | 1.79   | 8.37  | + | 2.34E-09 | 4.03E-07 |
| <a href="#">↳actin filament organization</a>                              | <a href="#">159</a>  | <a href="#">23</a>  | 3.61   | 6.38  | + | 1.83E-11 | 1.26E-08 |
| <a href="#">↳actin cytoskeleton organization</a>                          | <a href="#">238</a>  | <a href="#">26</a>  | 5.40   | 4.82  | + | 2.51E-10 | 8.62E-08 |
| <a href="#">↳cytoskeleton organization</a>                                | <a href="#">560</a>  | <a href="#">36</a>  | 12.70  | 2.83  | + | 6.54E-08 | 3.55E-06 |
| <a href="#">↳actin filament-based process</a>                             | <a href="#">246</a>  | <a href="#">26</a>  | 5.58   | 4.66  | + | 4.80E-10 | 1.24E-07 |
| <a href="#">↳protein-containing complex disassembly</a>                   | <a href="#">62</a>   | <a href="#">6</a>   | 1.41   | 4.27  | + | 3.96E-03 | 3.75E-02 |
| <a href="#">glucose 6-phosphate metabolic process</a>                     | <a href="#">9</a>    | <a href="#">3</a>   | .20    | 14.70 | + | 2.05E-03 | 2.27E-02 |
| <a href="#">response to hypoxia</a>                                       | <a href="#">12</a>   | <a href="#">4</a>   | .27    | 14.70 | + | 3.52E-04 | 5.42E-03 |
| <a href="#">↳response to stress</a>                                       | <a href="#">972</a>  | <a href="#">36</a>  | 22.05  | 1.63  | + | 5.80E-03 | 4.85E-02 |
| <a href="#">↳response to abiotic stimulus</a>                             | <a href="#">86</a>   | <a href="#">7</a>   | 1.95   | 3.59  | + | 4.65E-03 | 4.21E-02 |
| <a href="#">Arp2/3 complex-mediated actin nucleation</a>                  | <a href="#">18</a>   | <a href="#">6</a>   | .41    | 14.70 | + | 1.11E-05 | 2.97E-04 |
| <a href="#">↳positive regulation of actin filament polymerization</a>     | <a href="#">34</a>   | <a href="#">6</a>   | .77    | 7.78  | + | 2.34E-04 | 3.86E-03 |
| <a href="#">↳regulation of actin filament polymerization</a>              | <a href="#">71</a>   | <a href="#">13</a>  | 1.61   | 8.07  | + | 4.01E-08 | 2.76E-06 |
| <a href="#">↳regulation of protein polymerization</a>                     | <a href="#">75</a>   | <a href="#">13</a>  | 1.70   | 7.64  | + | 7.10E-08 | 3.76E-06 |
| <a href="#">↳regulation of protein complex assembly</a>                   | <a href="#">94</a>   | <a href="#">14</a>  | 2.13   | 6.57  | + | 1.21E-07 | 5.43E-06 |
| <a href="#">↳regulation of cellular component organization</a>            | <a href="#">396</a>  | <a href="#">21</a>  | 8.98   | 2.34  | + | 5.35E-04 | 7.73E-03 |
| <a href="#">↳regulation of cellular component biogenesis</a>              | <a href="#">140</a>  | <a href="#">15</a>  | 3.18   | 4.72  | + | 1.99E-06 | 6.84E-05 |
| <a href="#">↳regulation of actin polymerization or depolymerization</a>   | <a href="#">73</a>   | <a href="#">14</a>  | 1.66   | 8.46  | + | 7.16E-09 | 8.70E-07 |
| <a href="#">↳regulation of actin filament organization</a>                | <a href="#">81</a>   | <a href="#">14</a>  | 1.84   | 7.62  | + | 2.30E-08 | 1.70E-06 |
| <a href="#">↳regulation of actin cytoskeleton organization</a>            | <a href="#">106</a>  | <a href="#">15</a>  | 2.40   | 6.24  | + | 7.86E-08 | 3.96E-06 |
| <a href="#">↳regulation of actin filament-based process</a>               | <a href="#">107</a>  | <a href="#">15</a>  | 2.43   | 6.18  | + | 8.79E-08 | 4.32E-06 |
| <a href="#">↳regulation of cytoskeleton organization</a>                  | <a href="#">146</a>  | <a href="#">17</a>  | 3.31   | 5.13  | + | 1.42E-07 | 6.22E-06 |
| <a href="#">↳regulation of organelle organization</a>                     | <a href="#">264</a>  | <a href="#">18</a>  | 5.99   | 3.01  | + | 6.52E-05 | 1.31E-03 |
| <a href="#">↳regulation of supramolecular fiber organization</a>          | <a href="#">90</a>   | <a href="#">14</a>  | 2.04   | 6.86  | + | 7.47E-08 | 3.85E-06 |
| <a href="#">↳regulation of actin filament length</a>                      | <a href="#">73</a>   | <a href="#">14</a>  | 1.66   | 8.46  | + | 7.16E-09 | 9.24E-07 |
| <a href="#">↳regulation of cellular component size</a>                    | <a href="#">108</a>  | <a href="#">15</a>  | 2.45   | 6.12  | + | 9.80E-08 | 4.71E-06 |
| <a href="#">↳regulation of anatomical structure size</a>                  | <a href="#">120</a>  | <a href="#">16</a>  | 2.72   | 5.88  | + | 6.13E-08 | 3.52E-06 |
| <a href="#">↳regulation of biological quality</a>                         | <a href="#">905</a>  | <a href="#">38</a>  | 20.53  | 1.85  | + | 4.03E-04 | 5.98E-03 |
| <a href="#">↳positive regulation of supramolecular fiber organization</a> | <a href="#">48</a>   | <a href="#">8</a>   | 1.09   | 7.35  | + | 3.09E-05 | 7.16E-04 |
| <a href="#">↳positive regulation of cellular component organization</a>   | <a href="#">136</a>  | <a href="#">12</a>  | 3.08   | 3.89  | + | 1.19E-04 | 2.15E-03 |
| <a href="#">↳positive regulation of cytoskeleton organization</a>         | <a href="#">49</a>   | <a href="#">8</a>   | 1.11   | 7.20  | + | 3.52E-05 | 8.08E-04 |
| <a href="#">↳positive regulation of organelle organization</a>            | <a href="#">79</a>   | <a href="#">9</a>   | 1.79   | 5.02  | + | 1.46E-04 | 2.58E-03 |
| <a href="#">↳positive regulation of protein polymerization</a>            | <a href="#">38</a>   | <a href="#">6</a>   | .86    | 6.96  | + | 3.99E-04 | 5.97E-03 |
| <a href="#">↳positive regulation of protein complex assembly</a>          | <a href="#">43</a>   | <a href="#">7</a>   | .98    | 7.18  | + | 1.11E-04 | 2.02E-03 |
| <a href="#">↳positive regulation of cellular component biogenesis</a>     | <a href="#">64</a>   | <a href="#">8</a>   | 1.45   | 5.51  | + | 1.91E-04 | 3.34E-03 |
| <a href="#">cellular response to oxidative stress</a>                     | <a href="#">16</a>   | <a href="#">5</a>   | .36    | 13.78 | + | 7.98E-05 | 1.57E-03 |
| <a href="#">↳cellular response to chemical stimulus</a>                   | <a href="#">641</a>  | <a href="#">31</a>  | 14.54  | 2.13  | + | 1.43E-04 | 2.57E-03 |
| <a href="#">↳cellular response to stress</a>                              | <a href="#">444</a>  | <a href="#">20</a>  | 10.07  | 1.99  | + | 5.73E-03 | 4.83E-02 |

|                                                         |                     |                    |       |       |   |          |          |
|---------------------------------------------------------|---------------------|--------------------|-------|-------|---|----------|----------|
| ↳response to oxidative stress                           | <a href="#">25</a>  | <a href="#">7</a>  | .57   | 12.34 | + | 5.27E-06 | 1.65E-04 |
| bone morphogenesis                                      | <a href="#">14</a>  | <a href="#">4</a>  | .32   | 12.60 | + | 5.71E-04 | 8.08E-03 |
| ↳bone development                                       | <a href="#">21</a>  | <a href="#">4</a>  | .48   | 8.40  | + | 2.09E-03 | 2.28E-02 |
| ↳animal organ development                               | <a href="#">349</a> | <a href="#">17</a> | 7.92  | 2.15  | + | 3.81E-03 | 3.66E-02 |
| ↳animal organ morphogenesis                             | <a href="#">104</a> | <a href="#">10</a> | 2.36  | 4.24  | + | 2.29E-04 | 3.84E-03 |
| positive regulation of angiogenesis                     | <a href="#">11</a>  | <a href="#">3</a>  | .25   | 12.02 | + | 3.29E-03 | 3.33E-02 |
| ↳positive regulation of developmental process           | <a href="#">109</a> | <a href="#">8</a>  | 2.47  | 3.24  | + | 4.59E-03 | 4.19E-02 |
| epithelial cell proliferation                           | <a href="#">11</a>  | <a href="#">3</a>  | .25   | 12.02 | + | 3.29E-03 | 3.31E-02 |
| protein stabilization                                   | <a href="#">11</a>  | <a href="#">3</a>  | .25   | 12.02 | + | 3.29E-03 | 3.30E-02 |
| ↳regulation of protein stability                        | <a href="#">14</a>  | <a href="#">3</a>  | .32   | 9.45  | + | 5.85E-03 | 4.83E-02 |
| response to reactive oxygen species                     | <a href="#">11</a>  | <a href="#">3</a>  | .25   | 12.02 | + | 3.29E-03 | 3.28E-02 |
| glycolytic process                                      | <a href="#">20</a>  | <a href="#">5</a>  | .45   | 11.02 | + | 1.94E-04 | 3.36E-03 |
| ↳generation of precursor metabolites and energy         | <a href="#">103</a> | <a href="#">12</a> | 2.34  | 5.14  | + | 9.68E-06 | 2.70E-04 |
| ↳nucleotide phosphorylation                             | <a href="#">20</a>  | <a href="#">5</a>  | .45   | 11.02 | + | 1.94E-04 | 3.33E-03 |
| ↳organic substance catabolic process                    | <a href="#">703</a> | <a href="#">46</a> | 15.94 | 2.88  | + | 5.28E-10 | 1.21E-07 |
| ↳catabolic process                                      | <a href="#">888</a> | <a href="#">51</a> | 20.14 | 2.53  | + | 4.41E-09 | 6.06E-07 |
| ↳carbohydrate metabolic process                         | <a href="#">133</a> | <a href="#">9</a>  | 3.02  | 2.98  | + | 4.49E-03 | 4.14E-02 |
| ↳carboxylic acid metabolic process                      | <a href="#">331</a> | <a href="#">19</a> | 7.51  | 2.53  | + | 3.37E-04 | 5.31E-03 |
| ↳oxoacid metabolic process                              | <a href="#">342</a> | <a href="#">19</a> | 7.76  | 2.45  | + | 7.79E-04 | 1.06E-02 |
| ↳organic acid metabolic process                         | <a href="#">355</a> | <a href="#">19</a> | 8.05  | 2.36  | + | 9.67E-04 | 1.29E-02 |
| ↳ATP metabolic process                                  | <a href="#">56</a>  | <a href="#">6</a>  | 1.27  | 4.72  | + | 2.48E-03 | 2.59E-02 |
| chondrocyte differentiation                             | <a href="#">17</a>  | <a href="#">4</a>  | .39   | 10.37 | + | 1.06E-03 | 1.38E-02 |
| ↳cartilage development                                  | <a href="#">18</a>  | <a href="#">4</a>  | .41   | 9.80  | + | 1.27E-03 | 1.55E-02 |
| ↳connective tissue development                          | <a href="#">18</a>  | <a href="#">4</a>  | .41   | 9.80  | + | 1.27E-03 | 1.55E-02 |
| ↳tissue development                                     | <a href="#">179</a> | <a href="#">15</a> | 4.06  | 3.69  | + | 3.03E-05 | 7.10E-04 |
| regulation of leukocyte migration                       | <a href="#">17</a>  | <a href="#">4</a>  | .39   | 10.37 | + | 1.06E-03 | 1.38E-02 |
| ↳regulation of cell migration                           | <a href="#">79</a>  | <a href="#">8</a>  | 1.79  | 4.46  | + | 6.98E-04 | 9.67E-03 |
| ↳regulation of cell motility                            | <a href="#">86</a>  | <a href="#">8</a>  | 1.95  | 4.10  | + | 1.16E-03 | 1.44E-02 |
| ↳regulation of locomotion                               | <a href="#">91</a>  | <a href="#">8</a>  | 2.06  | 3.88  | + | 1.63E-03 | 1.87E-02 |
| ↳regulation of cellular component movement              | <a href="#">93</a>  | <a href="#">8</a>  | 2.11  | 3.79  | + | 1.85E-03 | 2.07E-02 |
| negative regulation of actin filament polymerization    | <a href="#">23</a>  | <a href="#">5</a>  | .52   | 9.58  | + | 3.39E-04 | 5.30E-03 |
| ↳negative regulation of organelle organization          | <a href="#">64</a>  | <a href="#">6</a>  | 1.45  | 4.13  | + | 4.57E-03 | 4.19E-02 |
| ↳negative regulation of cellular component organization | <a href="#">88</a>  | <a href="#">8</a>  | 2.00  | 4.01  | + | 1.33E-03 | 1.57E-02 |
| ↳negative regulation of cellular process                | <a href="#">914</a> | <a href="#">35</a> | 20.73 | 1.69  | + | 3.23E-03 | 3.28E-02 |
| ribosomal large subunit assembly                        | <a href="#">23</a>  | <a href="#">5</a>  | .52   | 9.58  | + | 3.39E-04 | 5.26E-03 |
| ↳ribonucleoprotein complex assembly                     | <a href="#">110</a> | <a href="#">8</a>  | 2.49  | 3.21  | + | 4.83E-03 | 4.34E-02 |
| ↳cellular protein-containing complex assembly           | <a href="#">367</a> | <a href="#">24</a> | 8.32  | 2.88  | + | 8.01E-06 | 2.40E-04 |
| ↳protein-containing complex assembly                    | <a href="#">394</a> | <a href="#">25</a> | 8.94  | 2.80  | + | 8.49E-06 | 2.50E-04 |
| ↳cellular component assembly                            | <a href="#">734</a> | <a href="#">37</a> | 16.65 | 2.22  | + | 1.45E-05 | 3.80E-04 |
| ↳cellular component biogenesis                          | <a href="#">867</a> | <a href="#">40</a> | 19.66 | 2.03  | + | 4.17E-05 | 9.16E-04 |
| ↳ribosomal large subunit biogenesis                     | <a href="#">63</a>  | <a href="#">6</a>  | 1.43  | 4.20  | + | 4.26E-03 | 3.96E-02 |
| ↳ribosome biogenesis                                    | <a href="#">176</a> | <a href="#">11</a> | 3.99  | 2.76  | + | 3.15E-03 | 3.22E-02 |
| chaperone-mediated protein folding                      | <a href="#">26</a>  | <a href="#">5</a>  | .59   | 8.48  | + | 5.55E-04 | 7.90E-03 |
| ↳protein folding                                        | <a href="#">81</a>  | <a href="#">21</a> | 1.84  | 11.43 | + | 7.50E-15 | 1.55E-11 |
| endoplasmic reticulum unfolded protein response         | <a href="#">22</a>  | <a href="#">4</a>  | .50   | 8.02  | + | 2.43E-03 | 2.54E-02 |
| ↳response to endoplasmic reticulum stress               | <a href="#">65</a>  | <a href="#">8</a>  | 1.47  | 5.43  | + | 2.10E-04 | 3.59E-03 |
| ↳cellular response to unfolded protein                  | <a href="#">29</a>  | <a href="#">6</a>  | .66   | 9.12  | + | 1.09E-04 | 2.00E-03 |
| ↳response to unfolded protein                           | <a href="#">29</a>  | <a href="#">6</a>  | .66   | 9.12  | + | 1.09E-04 | 2.02E-03 |
| ↳response to topologically incorrect protein            | <a href="#">41</a>  | <a href="#">7</a>  | .93   | 7.53  | + | 8.48E-05 | 1.64E-03 |
| ↳response to organic substance                          | <a href="#">558</a> | <a href="#">27</a> | 12.66 | 2.13  | + | 4.83E-04 | 7.02E-03 |
| ↳cellular response to topologically incorrect protein   | <a href="#">41</a>  | <a href="#">7</a>  | .93   | 7.53  | + | 8.48E-05 | 1.65E-03 |
| ↳cellular response to organic substance                 | <a href="#">488</a> | <a href="#">24</a> | 11.07 | 2.17  | + | 6.35E-04 | 8.85E-03 |
| actin filament polymerization                           | <a href="#">74</a>  | <a href="#">13</a> | 1.68  | 7.75  | + | 6.18E-08 | 3.45E-06 |
| ↳protein polymerization                                 | <a href="#">89</a>  | <a href="#">13</a> | 2.02  | 6.44  | + | 4.17E-07 | 1.63E-05 |

|                                                                                   |                      |                    |       |      |   |          |          |
|-----------------------------------------------------------------------------------|----------------------|--------------------|-------|------|---|----------|----------|
| <a href="#">granulocyte chemotaxis</a>                                            | <a href="#">38</a>   | <a href="#">6</a>  | .86   | 6.96 | + | 3.99E-04 | 6.01E-03 |
| ↳ <a href="#">myeloid leukocyte migration</a>                                     | <a href="#">48</a>   | <a href="#">9</a>  | 1.09  | 8.27 | + | 4.22E-06 | 1.38E-04 |
| ↳ <a href="#">leukocyte migration</a>                                             | <a href="#">57</a>   | <a href="#">9</a>  | 1.29  | 6.96 | + | 1.46E-05 | 3.76E-04 |
| ↳ <a href="#">cell migration</a>                                                  | <a href="#">255</a>  | <a href="#">25</a> | 5.78  | 4.32 | + | 4.25E-09 | 6.26E-07 |
| ↳ <a href="#">cell motility</a>                                                   | <a href="#">285</a>  | <a href="#">26</a> | 6.46  | 4.02 | + | 8.24E-09 | 8.51E-07 |
| ↳ <a href="#">movement of cell or subcellular component</a>                       | <a href="#">549</a>  | <a href="#">31</a> | 12.45 | 2.49 | + | 8.74E-06 | 2.54E-04 |
| ↳ <a href="#">localization of cell</a>                                            | <a href="#">285</a>  | <a href="#">26</a> | 6.46  | 4.02 | + | 8.24E-09 | 8.95E-07 |
| ↳ <a href="#">leukocyte chemotaxis</a>                                            | <a href="#">47</a>   | <a href="#">8</a>  | 1.07  | 7.50 | + | 2.70E-05 | 6.40E-04 |
| ↳ <a href="#">cell chemotaxis</a>                                                 | <a href="#">81</a>   | <a href="#">8</a>  | 1.84  | 4.35 | + | 8.12E-04 | 1.10E-02 |
| <a href="#">response to toxic substance</a>                                       | <a href="#">32</a>   | <a href="#">5</a>  | .73   | 6.89 | + | 1.28E-03 | 1.54E-02 |
| <a href="#">glucose metabolic process</a>                                         | <a href="#">26</a>   | <a href="#">4</a>  | .59   | 6.78 | + | 4.15E-03 | 3.87E-02 |
| <a href="#">glutathione metabolic process</a>                                     | <a href="#">35</a>   | <a href="#">5</a>  | .79   | 6.30 | + | 1.82E-03 | 2.06E-02 |
| ↳ <a href="#">peptide metabolic process</a>                                       | <a href="#">286</a>  | <a href="#">26</a> | 6.49  | 4.01 | + | 8.81E-09 | 8.66E-07 |
| ↳ <a href="#">cellular amide metabolic process</a>                                | <a href="#">369</a>  | <a href="#">26</a> | 8.37  | 3.11 | + | 9.30E-07 | 3.43E-05 |
| ↳ <a href="#">cellular modified amino acid metabolic process</a>                  | <a href="#">67</a>   | <a href="#">6</a>  | 1.52  | 3.95 | + | 5.61E-03 | 4.77E-02 |
| <a href="#">muscle contraction</a>                                                | <a href="#">43</a>   | <a href="#">6</a>  | .98   | 6.15 | + | 7.20E-04 | 9.84E-03 |
| ↳ <a href="#">muscle system process</a>                                           | <a href="#">45</a>   | <a href="#">6</a>  | 1.02  | 5.88 | + | 8.93E-04 | 1.20E-02 |
| <a href="#">response to interleukin-1</a>                                         | <a href="#">29</a>   | <a href="#">4</a>  | .66   | 6.08 | + | 5.88E-03 | 4.83E-02 |
| <a href="#">developmental growth</a>                                              | <a href="#">51</a>   | <a href="#">7</a>  | 1.16  | 6.05 | + | 2.86E-04 | 4.62E-03 |
| ↳ <a href="#">growth</a>                                                          | <a href="#">55</a>   | <a href="#">7</a>  | 1.25  | 5.61 | + | 4.34E-04 | 6.35E-03 |
| <a href="#">negative regulation of endopeptidase activity</a>                     | <a href="#">82</a>   | <a href="#">10</a> | 1.86  | 5.38 | + | 3.73E-05 | 8.29E-04 |
| ↳ <a href="#">negative regulation of peptidase activity</a>                       | <a href="#">87</a>   | <a href="#">10</a> | 1.97  | 5.07 | + | 5.90E-05 | 1.24E-03 |
| ↳ <a href="#">negative regulation of hydrolase activity</a>                       | <a href="#">102</a>  | <a href="#">11</a> | 2.31  | 4.75 | + | 4.35E-05 | 9.44E-04 |
| ↳ <a href="#">regulation of hydrolase activity</a>                                | <a href="#">287</a>  | <a href="#">15</a> | 6.51  | 2.30 | + | 4.33E-03 | 4.01E-02 |
| ↳ <a href="#">negative regulation of catalytic activity</a>                       | <a href="#">169</a>  | <a href="#">11</a> | 3.83  | 2.87 | + | 2.35E-03 | 2.51E-02 |
| ↳ <a href="#">regulation of peptidase activity</a>                                | <a href="#">112</a>  | <a href="#">11</a> | 2.54  | 4.33 | + | 9.45E-05 | 1.79E-03 |
| ↳ <a href="#">regulation of proteolysis</a>                                       | <a href="#">155</a>  | <a href="#">13</a> | 3.52  | 3.70 | + | 1.00E-04 | 1.89E-03 |
| ↳ <a href="#">regulation of protein metabolic process</a>                         | <a href="#">581</a>  | <a href="#">26</a> | 13.18 | 1.97 | + | 1.75E-03 | 1.99E-02 |
| ↳ <a href="#">negative regulation of proteolysis</a>                              | <a href="#">88</a>   | <a href="#">10</a> | 2.00  | 5.01 | + | 6.44E-05 | 1.32E-03 |
| ↳ <a href="#">negative regulation of cellular protein metabolic process</a>       | <a href="#">164</a>  | <a href="#">11</a> | 3.72  | 2.96 | + | 1.88E-03 | 2.10E-02 |
| ↳ <a href="#">negative regulation of protein metabolic process</a>                | <a href="#">168</a>  | <a href="#">12</a> | 3.81  | 3.15 | + | 7.15E-04 | 9.84E-03 |
| ↳ <a href="#">regulation of cellular protein metabolic process</a>                | <a href="#">533</a>  | <a href="#">24</a> | 12.09 | 1.99 | + | 1.95E-03 | 2.16E-02 |
| ↳ <a href="#">regulation of endopeptidase activity</a>                            | <a href="#">107</a>  | <a href="#">11</a> | 2.43  | 4.53 | + | 6.48E-05 | 1.31E-03 |
| <a href="#">negative regulation of apoptotic process</a>                          | <a href="#">41</a>   | <a href="#">5</a>  | .93   | 5.38 | + | 3.41E-03 | 3.35E-02 |
| ↳ <a href="#">regulation of cell death</a>                                        | <a href="#">123</a>  | <a href="#">13</a> | 2.79  | 4.66 | + | 1.09E-05 | 3.00E-04 |
| ↳ <a href="#">negative regulation of programmed cell death</a>                    | <a href="#">42</a>   | <a href="#">5</a>  | .95   | 5.25 | + | 3.75E-03 | 3.61E-02 |
| ↳ <a href="#">negative regulation of cell death</a>                               | <a href="#">54</a>   | <a href="#">11</a> | 1.22  | 8.98 | + | 1.74E-07 | 7.18E-06 |
| <a href="#">positive regulation of cell migration</a>                             | <a href="#">43</a>   | <a href="#">5</a>  | .98   | 5.13 | + | 4.11E-03 | 3.87E-02 |
| ↳ <a href="#">positive regulation of cell motility</a>                            | <a href="#">47</a>   | <a href="#">5</a>  | 1.07  | 4.69 | + | 5.80E-03 | 4.87E-02 |
| <a href="#">carbohydrate biosynthetic process</a>                                 | <a href="#">43</a>   | <a href="#">5</a>  | .98   | 5.13 | + | 4.11E-03 | 3.85E-02 |
| <a href="#">cell-substrate adhesion</a>                                           | <a href="#">45</a>   | <a href="#">5</a>  | 1.02  | 4.90 | + | 4.90E-03 | 4.36E-02 |
| ↳ <a href="#">cell adhesion</a>                                                   | <a href="#">288</a>  | <a href="#">19</a> | 6.53  | 2.91 | + | 6.23E-05 | 1.30E-03 |
| ↳ <a href="#">biological adhesion</a>                                             | <a href="#">288</a>  | <a href="#">19</a> | 6.53  | 2.91 | + | 6.23E-05 | 1.29E-03 |
| <a href="#">response to inorganic substance</a>                                   | <a href="#">54</a>   | <a href="#">6</a>  | 1.22  | 4.90 | + | 2.10E-03 | 2.28E-02 |
| <a href="#">cellular transition metal ion homeostasis</a>                         | <a href="#">46</a>   | <a href="#">5</a>  | 1.04  | 4.79 | + | 5.34E-03 | 4.59E-02 |
| ↳ <a href="#">transition metal ion homeostasis</a>                                | <a href="#">55</a>   | <a href="#">6</a>  | 1.25  | 4.81 | + | 2.29E-03 | 2.46E-02 |
| <a href="#">cellular response to growth factor stimulus</a>                       | <a href="#">90</a>   | <a href="#">9</a>  | 2.04  | 4.41 | + | 3.58E-04 | 5.43E-03 |
| ↳ <a href="#">response to growth factor</a>                                       | <a href="#">90</a>   | <a href="#">9</a>  | 2.04  | 4.41 | + | 3.58E-04 | 5.47E-03 |
| <a href="#">proteasome-mediated ubiquitin-dependent protein catabolic process</a> | <a href="#">194</a>  | <a href="#">18</a> | 4.40  | 4.09 | + | 1.32E-06 | 4.61E-05 |
| ↳ <a href="#">proteasomal protein catabolic process</a>                           | <a href="#">205</a>  | <a href="#">18</a> | 4.65  | 3.87 | + | 2.72E-06 | 9.20E-05 |
| ↳ <a href="#">proteolysis involved in cellular protein catabolic process</a>      | <a href="#">331</a>  | <a href="#">28</a> | 7.51  | 3.73 | + | 1.01E-08 | 9.46E-07 |
| ↳ <a href="#">proteolysis</a>                                                     | <a href="#">693</a>  | <a href="#">45</a> | 15.72 | 2.86 | + | 1.03E-09 | 1.93E-07 |
| ↳ <a href="#">protein metabolic process</a>                                       | <a href="#">2115</a> | <a href="#">87</a> | 47.97 | 1.81 | + | 1.06E-07 | 4.96E-06 |
| ↳ <a href="#">cellular protein catabolic process</a>                              | <a href="#">333</a>  | <a href="#">28</a> | 7.55  | 3.71 | + | 1.14E-08 | 1.02E-06 |

|                                                                          |                       |                     |        |        |   |          |          |
|--------------------------------------------------------------------------|-----------------------|---------------------|--------|--------|---|----------|----------|
| ↳cellular macromolecule catabolic process                                | <a href="#">429</a>   | <a href="#">29</a>  | 9.73   | 2.98   | + | 4.89E-07 | 1.87E-05 |
| ↳macromolecule catabolic process                                         | <a href="#">463</a>   | <a href="#">33</a>  | 10.50  | 3.14   | + | 2.45E-08 | 1.74E-06 |
| ↳cellular catabolic process                                              | <a href="#">765</a>   | <a href="#">42</a>  | 17.35  | 2.42   | + | 5.16E-07 | 1.94E-05 |
| ↳protein catabolic process                                               | <a href="#">355</a>   | <a href="#">31</a>  | 8.05   | 3.85   | + | 7.95E-10 | 1.64E-07 |
| ↳organonitrogen compound catabolic process                               | <a href="#">457</a>   | <a href="#">36</a>  | 10.37  | 3.47   | + | 4.64E-10 | 1.37E-07 |
| ↳cellular protein metabolic process                                      | <a href="#">1711</a>  | <a href="#">78</a>  | 38.81  | 2.01   | + | 7.66E-09 | 8.79E-07 |
| ↳ubiquitin-dependent protein catabolic process                           | <a href="#">276</a>   | <a href="#">19</a>  | 6.26   | 3.04   | + | 3.64E-05 | 8.26E-04 |
| ↳modification-dependent protein catabolic process                        | <a href="#">285</a>   | <a href="#">20</a>  | 6.46   | 3.09   | + | 1.76E-05 | 4.44E-04 |
| ↳modification-dependent macromolecule catabolic process                  | <a href="#">290</a>   | <a href="#">20</a>  | 6.58   | 3.04   | + | 2.23E-05 | 5.35E-04 |
| oxidation-reduction process                                              | <a href="#">220</a>   | <a href="#">18</a>  | 4.99   | 3.61   | + | 6.77E-06 | 2.05E-04 |
| cell death                                                               | <a href="#">186</a>   | <a href="#">15</a>  | 4.22   | 3.56   | + | 4.56E-05 | 9.81E-04 |
| translational elongation                                                 | <a href="#">216</a>   | <a href="#">17</a>  | 4.90   | 3.47   | + | 1.94E-05 | 4.76E-04 |
| ↳translation                                                             | <a href="#">216</a>   | <a href="#">17</a>  | 4.90   | 3.47   | + | 1.94E-05 | 4.70E-04 |
| ↳peptide biosynthetic process                                            | <a href="#">219</a>   | <a href="#">18</a>  | 4.97   | 3.62   | + | 6.38E-06 | 1.97E-04 |
| ↳organonitrogen compound biosynthetic process                            | <a href="#">589</a>   | <a href="#">28</a>  | 13.36  | 2.10   | + | 4.04E-04 | 5.96E-03 |
| ↳amide biosynthetic process                                              | <a href="#">252</a>   | <a href="#">18</a>  | 5.72   | 3.15   | + | 3.71E-05 | 8.31E-04 |
| cellular amino acid metabolic process                                    | <a href="#">123</a>   | <a href="#">9</a>   | 2.79   | 3.23   | + | 2.76E-03 | 2.85E-02 |
| enzyme linked receptor protein signaling pathway                         | <a href="#">213</a>   | <a href="#">14</a>  | 4.83   | 2.90   | + | 5.81E-04 | 8.16E-03 |
| cell morphogenesis involved in differentiation                           | <a href="#">181</a>   | <a href="#">11</a>  | 4.11   | 2.68   | + | 3.85E-03 | 3.68E-02 |
| ↳cell morphogenesis                                                      | <a href="#">255</a>   | <a href="#">15</a>  | 5.78   | 2.59   | + | 1.10E-03 | 1.41E-02 |
| ↳cellular component morphogenesis                                        | <a href="#">281</a>   | <a href="#">16</a>  | 6.37   | 2.51   | + | 1.05E-03 | 1.38E-02 |
| Unclassified                                                             | <a href="#">12808</a> | <a href="#">231</a> | 290.50 | .80    | - | 1.52E-07 | 6.54E-06 |
| organic substance transport                                              | <a href="#">801</a>   | <a href="#">6</a>   | 18.17  | .33    | - | 2.07E-03 | 2.27E-02 |
| ↳establishment of localization                                           | <a href="#">1847</a>  | <a href="#">25</a>  | 41.89  | .60    | - | 5.21E-03 | 4.54E-02 |
| ion transport                                                            | <a href="#">599</a>   | <a href="#">4</a>   | 13.59  | .29    | - | 4.63E-03 | 4.21E-02 |
| G protein-coupled receptor signaling pathway                             | <a href="#">682</a>   | <a href="#">3</a>   | 15.47  | .19    | - | 2.95E-04 | 4.72E-03 |
| regulation of transcription by RNA polymerase II                         | <a href="#">745</a>   | <a href="#">3</a>   | 16.90  | .18    | - | 7.18E-05 | 1.43E-03 |
| ↳regulation of transcription, DNA-templated                              | <a href="#">1117</a>  | <a href="#">3</a>   | 25.34  | .12    | - | 5.36E-08 | 3.45E-06 |
| ↳regulation of gene expression                                           | <a href="#">1368</a>  | <a href="#">9</a>   | 31.03  | .29    | - | 4.54E-06 | 1.46E-04 |
| ↳regulation of nucleic acid-templated transcription                      | <a href="#">1117</a>  | <a href="#">3</a>   | 25.34  | .12    | - | 5.36E-08 | 3.35E-06 |
| ↳regulation of RNA biosynthetic process                                  | <a href="#">1117</a>  | <a href="#">3</a>   | 25.34  | .12    | - | 5.36E-08 | 3.25E-06 |
| ↳regulation of RNA metabolic process                                     | <a href="#">1222</a>  | <a href="#">5</a>   | 27.72  | .18    | - | 2.22E-07 | 8.98E-06 |
| ↳regulation of nucleobase-containing compound metabolic process          | <a href="#">1263</a>  | <a href="#">5</a>   | 28.65  | .17    | - | 1.11E-07 | 5.10E-06 |
| ↳regulation of cellular biosynthetic process                             | <a href="#">1234</a>  | <a href="#">8</a>   | 27.99  | .29    | - | 1.56E-05 | 3.97E-04 |
| ↳regulation of biosynthetic process                                      | <a href="#">1240</a>  | <a href="#">8</a>   | 28.12  | .28    | - | 1.10E-05 | 2.99E-04 |
| ↳regulation of macromolecule biosynthetic process                        | <a href="#">1223</a>  | <a href="#">6</a>   | 27.74  | .22    | - | 1.16E-06 | 4.11E-05 |
| ↳regulation of cellular macromolecule biosynthetic process               | <a href="#">1216</a>  | <a href="#">6</a>   | 27.58  | .22    | - | 1.13E-06 | 4.09E-05 |
| transcription by RNA polymerase II                                       | <a href="#">772</a>   | <a href="#">3</a>   | 17.51  | .17    | - | 5.18E-05 | 1.10E-03 |
| ↳transcription, DNA-templated                                            | <a href="#">1159</a>  | <a href="#">3</a>   | 26.29  | .11    | - | 1.65E-08 | 1.31E-06 |
| ↳nucleic acid-templated transcription                                    | <a href="#">1159</a>  | <a href="#">3</a>   | 26.29  | .11    | - | 1.65E-08 | 1.36E-06 |
| ↳RNA biosynthetic process                                                | <a href="#">1166</a>  | <a href="#">3</a>   | 26.45  | .11    | - | 1.68E-08 | 1.29E-06 |
| ↳nucleobase-containing compound biosynthetic process                     | <a href="#">1376</a>  | <a href="#">10</a>  | 31.21  | .32    | - | 1.25E-05 | 3.30E-04 |
| ↳aromatic compound biosynthetic process                                  | <a href="#">1399</a>  | <a href="#">10</a>  | 31.73  | .32    | - | 9.12E-06 | 2.58E-04 |
| ↳organic cyclic compound biosynthetic process                            | <a href="#">1433</a>  | <a href="#">10</a>  | 32.50  | .31    | - | 4.84E-06 | 1.54E-04 |
| ↳heterocycle biosynthetic process                                        | <a href="#">1399</a>  | <a href="#">10</a>  | 31.73  | .32    | - | 9.12E-06 | 2.61E-04 |
| ↳RNA metabolic process                                                   | <a href="#">1673</a>  | <a href="#">13</a>  | 37.95  | .34    | - | 2.86E-06 | 9.51E-05 |
| ↳nucleic acid metabolic process                                          | <a href="#">1911</a>  | <a href="#">14</a>  | 43.34  | .32    | - | 2.44E-07 | 9.69E-06 |
| positive regulation of transcription, DNA-templated                      | <a href="#">421</a>   | <a href="#">1</a>   | 9.55   | .10    | - | 1.29E-03 | 1.54E-02 |
| ↳positive regulation of nucleic acid-templated transcription             | <a href="#">421</a>   | <a href="#">1</a>   | 9.55   | .10    | - | 1.29E-03 | 1.55E-02 |
| ↳positive regulation of RNA biosynthetic process                         | <a href="#">421</a>   | <a href="#">1</a>   | 9.55   | .10    | - | 1.29E-03 | 1.54E-02 |
| ↳positive regulation of macromolecule biosynthetic process               | <a href="#">451</a>   | <a href="#">2</a>   | 10.23  | .20    | - | 5.26E-03 | 4.56E-02 |
| ↳positive regulation of RNA metabolic process                            | <a href="#">444</a>   | <a href="#">2</a>   | 10.07  | .20    | - | 5.11E-03 | 4.50E-02 |
| ↳positive regulation of nucleobase-containing compound metabolic process | <a href="#">461</a>   | <a href="#">2</a>   | 10.46  | .19    | - | 3.61E-03 | 3.52E-02 |
| immune response-activating signal transduction                           | <a href="#">267</a>   | <a href="#">0</a>   | 6.06   | < 0.01 | - | 5.12E-03 | 4.50E-02 |

|                                                                          |                     |                   |      |        |   |          |          |
|--------------------------------------------------------------------------|---------------------|-------------------|------|--------|---|----------|----------|
| ↳immune response-regulating signaling pathway                            | <a href="#">269</a> | <a href="#">0</a> | 6.10 | < 0.01 | - | 5.20E-03 | 4.55E-02 |
| ↳activation of immune response                                           | <a href="#">278</a> | <a href="#">0</a> | 6.31 | < 0.01 | - | 3.35E-03 | 3.32E-02 |
| negative regulation of transcription, DNA-templated                      | <a href="#">305</a> | <a href="#">0</a> | 6.92 | < 0.01 | - | 2.40E-03 | 2.54E-02 |
| ↳negative regulation of nucleic acid-templated transcription             | <a href="#">305</a> | <a href="#">0</a> | 6.92 | < 0.01 | - | 2.40E-03 | 2.56E-02 |
| ↳negative regulation of RNA biosynthetic process                         | <a href="#">305</a> | <a href="#">0</a> | 6.92 | < 0.01 | - | 2.40E-03 | 2.53E-02 |
| ↳negative regulation of RNA metabolic process                            | <a href="#">316</a> | <a href="#">0</a> | 7.17 | < 0.01 | - | 1.55E-03 | 1.82E-02 |
| ↳negative regulation of nucleobase-containing compound metabolic process | <a href="#">329</a> | <a href="#">0</a> | 7.46 | < 0.01 | - | 1.03E-03 | 1.36E-02 |
| ↳negative regulation of cellular biosynthetic process                    | <a href="#">354</a> | <a href="#">1</a> | 8.03 | .12    | - | 5.61E-03 | 4.79E-02 |
| ↳negative regulation of biosynthetic process                             | <a href="#">354</a> | <a href="#">1</a> | 8.03 | .12    | - | 5.61E-03 | 4.81E-02 |
| ↳negative regulation of gene expression                                  | <a href="#">409</a> | <a href="#">0</a> | 9.28 | < 0.01 | - | 2.30E-04 | 3.82E-03 |



**PANTHER 15.0 released!**

Analysis Summary: Please report in publication [?](#) **BM-MSc secretome from HFD mice**

**Analysis Type:** PANTHER Overrepresentation Test (Released 20190711)

---

**Annotation Version and Release Date:** PANTHER version 15 Released 2020-02-14

---

**Analyzed List:** Client Text Box Input (Mus musculus) [Change](#)

---

**Reference List:** Mus musculus (all genes in database) [Change](#)

---

**Annotation Data Set:** PANTHER GO-Slim Biological Process [?](#)

---

**Test Type:**  Fisher's Exact  Binomial

---

**Correction:**  Calculate False Discovery Rate  Use the Bonferroni correction for multiple testing [?](#)  No correction

Results [?](#)

|                               | Reference list                     | Client Text Box Input          |
|-------------------------------|------------------------------------|--------------------------------|
| Uniquely Mapped IDs:          | <a href="#">22265</a> out of 22265 | <a href="#">438</a> out of 438 |
| Unmapped IDs:                 | <a href="#">0</a>                  | <a href="#">3</a>              |
| Multiple mapping information: | <a href="#">0</a>                  | <a href="#">9</a>              |

Export [Table](#) [XML with user input ids](#) [JSON with user input ids](#) View: -- Please select a chart to display --

Displaying only results for FDR P < 0.05, [click here to display all results](#)

|                                                                   | Mus musculus (REF)   | Client Text Box Input | <a href="#">Hierarchy</a> | <a href="#">NEW!</a> | <a href="#">?</a>   |
|-------------------------------------------------------------------|----------------------|-----------------------|---------------------------|----------------------|---------------------|
|                                                                   | #                    | #                     | expected                  | Fold Enrichment      | +/- raw P value FDR |
| <a href="#">PANTHER GO-Slim Biological Process</a>                |                      |                       |                           |                      |                     |
| <a href="#">tissue remodeling</a>                                 | <a href="#">3</a>    | <a href="#">2</a>     | .06                       | 33.89                | + 3.57E-03 4.21E-02 |
| <a href="#">collagen fibril organization</a>                      | <a href="#">11</a>   | <a href="#">6</a>     | .22                       | 27.73                | + 5.15E-07 3.43E-05 |
| ↳ <a href="#">supramolecular fiber organization</a>               | <a href="#">236</a>  | <a href="#">28</a>    | 4.64                      | 6.03                 | + 3.03E-13 6.26E-10 |
| ↳ <a href="#">cellular process</a>                                | <a href="#">7925</a> | <a href="#">210</a>   | 155.90                    | 1.35                 | + 1.90E-07 1.45E-05 |
| ↳ <a href="#">extracellular matrix organization</a>               | <a href="#">56</a>   | <a href="#">15</a>    | 1.10                      | 13.62                | + 5.13E-12 5.30E-09 |
| ↳ <a href="#">extracellular structure organization</a>            | <a href="#">63</a>   | <a href="#">15</a>    | 1.24                      | 12.10                | + 2.17E-11 1.49E-08 |
| ↳ <a href="#">protein-containing complex subunit organization</a> | <a href="#">481</a>  | <a href="#">23</a>    | 9.46                      | 2.43                 | + 1.86E-04 3.59E-03 |
| <a href="#">bone morphogenesis</a>                                | <a href="#">14</a>   | <a href="#">6</a>     | .28                       | 21.79                | + 1.54E-06 8.80E-05 |
| ↳ <a href="#">bone development</a>                                | <a href="#">21</a>   | <a href="#">6</a>     | .41                       | 14.52                | + 1.05E-05 3.17E-04 |
| ↳ <a href="#">skeletal system development</a>                     | <a href="#">54</a>   | <a href="#">7</a>     | 1.06                      | 6.59                 | + 1.68E-04 3.31E-03 |
| ↳ <a href="#">animal organ development</a>                        | <a href="#">349</a>  | <a href="#">20</a>    | 6.87                      | 2.91                 | + 3.69E-05 8.96E-04 |
| ↳ <a href="#">animal organ morphogenesis</a>                      | <a href="#">104</a>  | <a href="#">11</a>    | 2.05                      | 5.38                 | + 1.43E-05 4.28E-04 |
| ↳ <a href="#">anatomical structure morphogenesis</a>              | <a href="#">450</a>  | <a href="#">21</a>    | 8.85                      | 2.37                 | + 4.56E-04 7.85E-03 |
| <a href="#">chondrocyte differentiation</a>                       | <a href="#">17</a>   | <a href="#">6</a>     | .33                       | 17.94                | + 3.81E-06 1.60E-04 |
| ↳ <a href="#">cartilage development</a>                           | <a href="#">18</a>   | <a href="#">6</a>     | .35                       | 16.94                | + 4.99E-06 1.84E-04 |
| ↳ <a href="#">connective tissue development</a>                   | <a href="#">18</a>   | <a href="#">6</a>     | .35                       | 16.94                | + 4.99E-06 1.87E-04 |
| ↳ <a href="#">tissue development</a>                              | <a href="#">179</a>  | <a href="#">16</a>    | 3.52                      | 4.54                 | + 1.33E-06 8.07E-05 |
| <a href="#">glucose 6-phosphate metabolic process</a>             | <a href="#">9</a>    | <a href="#">3</a>     | .18                       | 16.94                | + 1.38E-03 1.98E-02 |
| <a href="#">cellular response to oxidative stress</a>             | <a href="#">16</a>   | <a href="#">5</a>     | .31                       | 15.89                | + 4.12E-05 9.88E-04 |
| ↳ <a href="#">cellular response to chemical stimulus</a>          | <a href="#">641</a>  | <a href="#">27</a>    | 12.61                     | 2.14                 | + 2.97E-04 5.32E-03 |
| ↳ <a href="#">response to chemical</a>                            | <a href="#">915</a>  | <a href="#">35</a>    | 18.00                     | 1.94                 | + 2.55E-04 4.65E-03 |
| ↳ <a href="#">response to stress</a>                              | <a href="#">972</a>  | <a href="#">35</a>    | 19.12                     | 1.83                 | + 8.88E-04 1.36E-02 |
| ↳ <a href="#">response to oxidative stress</a>                    | <a href="#">25</a>   | <a href="#">7</a>     | .49                       | 14.23                | + 2.10E-06 1.06E-04 |



|                                                                            |                      |                    |       |       |   |          |          |
|----------------------------------------------------------------------------|----------------------|--------------------|-------|-------|---|----------|----------|
| <a href="#">Arp2/3 complex-mediated actin nucleation</a>                   | <a href="#">18</a>   | <a href="#">5</a>  | .35   | 14.12 | + | 6.60E-05 | 1.50E-03 |
| ↳ <a href="#">positive regulation of actin filament polymerization</a>     | <a href="#">34</a>   | <a href="#">5</a>  | .67   | 7.48  | + | 8.76E-04 | 1.36E-02 |
| ↳ <a href="#">regulation of actin filament polymerization</a>              | <a href="#">71</a>   | <a href="#">9</a>  | 1.40  | 6.44  | + | 2.36E-05 | 6.48E-04 |
| ↳ <a href="#">regulation of protein polymerization</a>                     | <a href="#">75</a>   | <a href="#">9</a>  | 1.48  | 6.10  | + | 3.49E-05 | 8.69E-04 |
| ↳ <a href="#">regulation of protein complex assembly</a>                   | <a href="#">94</a>   | <a href="#">9</a>  | 1.85  | 4.87  | + | 1.73E-04 | 3.36E-03 |
| ↳ <a href="#">regulation of cellular component biogenesis</a>              | <a href="#">140</a>  | <a href="#">10</a> | 2.75  | 3.63  | + | 6.85E-04 | 1.11E-02 |
| ↳ <a href="#">regulation of actin polymerization or depolymerization</a>   | <a href="#">73</a>   | <a href="#">10</a> | 1.44  | 6.96  | + | 4.47E-06 | 1.81E-04 |
| ↳ <a href="#">regulation of actin filament organization</a>                | <a href="#">81</a>   | <a href="#">10</a> | 1.59  | 6.28  | + | 1.03E-05 | 3.17E-04 |
| ↳ <a href="#">regulation of actin cytoskeleton organization</a>            | <a href="#">106</a>  | <a href="#">10</a> | 2.09  | 4.80  | + | 8.52E-05 | 1.89E-03 |
| ↳ <a href="#">regulation of actin filament-based process</a>               | <a href="#">107</a>  | <a href="#">10</a> | 2.10  | 4.75  | + | 9.15E-05 | 1.97E-03 |
| ↳ <a href="#">regulation of cytoskeleton organization</a>                  | <a href="#">146</a>  | <a href="#">11</a> | 2.87  | 3.83  | + | 2.44E-04 | 4.50E-03 |
| ↳ <a href="#">regulation of supramolecular fiber organization</a>          | <a href="#">90</a>   | <a href="#">10</a> | 1.77  | 5.65  | + | 2.38E-05 | 6.45E-04 |
| ↳ <a href="#">regulation of actin filament length</a>                      | <a href="#">73</a>   | <a href="#">10</a> | 1.44  | 6.96  | + | 4.47E-06 | 1.84E-04 |
| ↳ <a href="#">regulation of cellular component size</a>                    | <a href="#">108</a>  | <a href="#">11</a> | 2.12  | 5.18  | + | 1.98E-05 | 5.52E-04 |
| ↳ <a href="#">regulation of anatomical structure size</a>                  | <a href="#">120</a>  | <a href="#">12</a> | 2.36  | 5.08  | + | 9.90E-06 | 3.10E-04 |
| ↳ <a href="#">regulation of biological quality</a>                         | <a href="#">905</a>  | <a href="#">32</a> | 17.80 | 1.80  | + | 2.13E-03 | 2.94E-02 |
| ↳ <a href="#">positive regulation of supramolecular fiber organization</a> | <a href="#">48</a>   | <a href="#">7</a>  | .94   | 7.41  | + | 8.65E-05 | 1.90E-03 |
| ↳ <a href="#">positive regulation of cellular component organization</a>   | <a href="#">136</a>  | <a href="#">10</a> | 2.68  | 3.74  | + | 5.54E-04 | 9.46E-03 |
| ↳ <a href="#">positive regulation of cytoskeleton organization</a>         | <a href="#">49</a>   | <a href="#">7</a>  | .96   | 7.26  | + | 9.73E-05 | 2.05E-03 |
| ↳ <a href="#">positive regulation of organelle organization</a>            | <a href="#">79</a>   | <a href="#">9</a>  | 1.55  | 5.79  | + | 5.07E-05 | 1.19E-03 |
| ↳ <a href="#">positive regulation of protein polymerization</a>            | <a href="#">38</a>   | <a href="#">5</a>  | .75   | 6.69  | + | 1.38E-03 | 1.98E-02 |
| ↳ <a href="#">positive regulation of protein complex assembly</a>          | <a href="#">43</a>   | <a href="#">5</a>  | .85   | 5.91  | + | 2.26E-03 | 2.95E-02 |
| ↳ <a href="#">positive regulation of cellular component biogenesis</a>     | <a href="#">64</a>   | <a href="#">6</a>  | 1.26  | 4.77  | + | 2.31E-03 | 2.99E-02 |
| ↳ <a href="#">actin filament organization</a>                              | <a href="#">159</a>  | <a href="#">19</a> | 3.13  | 6.07  | + | 1.87E-09 | 2.76E-07 |
| ↳ <a href="#">actin cytoskeleton organization</a>                          | <a href="#">238</a>  | <a href="#">22</a> | 4.68  | 4.70  | + | 7.97E-09 | 9.14E-07 |
| ↳ <a href="#">cytoskeleton organization</a>                                | <a href="#">560</a>  | <a href="#">26</a> | 11.02 | 2.36  | + | 9.04E-05 | 1.96E-03 |
| ↳ <a href="#">actin filament-based process</a>                             | <a href="#">246</a>  | <a href="#">22</a> | 4.84  | 4.55  | + | 1.39E-08 | 1.51E-06 |
| <a href="#">response to reactive oxygen species</a>                        | <a href="#">11</a>   | <a href="#">3</a>  | .22   | 13.86 | + | 2.22E-03 | 2.97E-02 |
| <a href="#">granulocyte chemotaxis</a>                                     | <a href="#">38</a>   | <a href="#">10</a> | .75   | 13.38 | + | 2.19E-08 | 2.15E-06 |
| ↳ <a href="#">myeloid leukocyte migration</a>                              | <a href="#">48</a>   | <a href="#">11</a> | .94   | 11.65 | + | 1.48E-08 | 1.53E-06 |
| ↳ <a href="#">leukocyte migration</a>                                      | <a href="#">57</a>   | <a href="#">12</a> | 1.12  | 10.70 | + | 7.47E-09 | 9.07E-07 |
| ↳ <a href="#">cell migration</a>                                           | <a href="#">255</a>  | <a href="#">26</a> | 5.02  | 5.18  | + | 4.81E-11 | 1.98E-08 |
| ↳ <a href="#">cell motility</a>                                            | <a href="#">285</a>  | <a href="#">27</a> | 5.61  | 4.82  | + | 9.37E-11 | 2.42E-08 |
| ↳ <a href="#">movement of cell or subcellular component</a>                | <a href="#">549</a>  | <a href="#">31</a> | 10.80 | 2.87  | + | 3.74E-07 | 2.58E-05 |
| ↳ <a href="#">locomotion</a>                                               | <a href="#">356</a>  | <a href="#">29</a> | 7.00  | 4.14  | + | 5.07E-10 | 9.52E-08 |
| ↳ <a href="#">localization of cell</a>                                     | <a href="#">285</a>  | <a href="#">27</a> | 5.61  | 4.82  | + | 9.37E-11 | 2.76E-08 |
| ↳ <a href="#">leukocyte chemotaxis</a>                                     | <a href="#">47</a>   | <a href="#">12</a> | .92   | 12.98 | + | 1.13E-09 | 1.79E-07 |
| ↳ <a href="#">cell chemotaxis</a>                                          | <a href="#">81</a>   | <a href="#">12</a> | 1.59  | 7.53  | + | 2.32E-07 | 1.71E-05 |
| ↳ <a href="#">chemotaxis</a>                                               | <a href="#">186</a>  | <a href="#">15</a> | 3.66  | 4.10  | + | 9.06E-06 | 2.88E-04 |
| ↳ <a href="#">taxis</a>                                                    | <a href="#">186</a>  | <a href="#">15</a> | 3.66  | 4.10  | + | 9.06E-06 | 2.92E-04 |
| <a href="#">glycolytic process</a>                                         | <a href="#">20</a>   | <a href="#">5</a>  | .39   | 12.71 | + | 1.01E-04 | 2.10E-03 |
| ↳ <a href="#">generation of precursor metabolites and energy</a>           | <a href="#">103</a>  | <a href="#">9</a>  | 2.03  | 4.44  | + | 3.25E-04 | 5.78E-03 |
| ↳ <a href="#">nucleotide phosphorylation</a>                               | <a href="#">20</a>   | <a href="#">5</a>  | .39   | 12.71 | + | 1.01E-04 | 2.08E-03 |
| ↳ <a href="#">organic substance catabolic process</a>                      | <a href="#">703</a>  | <a href="#">43</a> | 13.83 | 3.11  | + | 1.85E-10 | 4.25E-08 |
| ↳ <a href="#">catabolic process</a>                                        | <a href="#">888</a>  | <a href="#">49</a> | 17.47 | 2.80  | + | 2.65E-10 | 5.47E-08 |
| ↳ <a href="#">cellular aromatic compound metabolic process</a>             | <a href="#">2163</a> | <a href="#">23</a> | 42.55 | .54   | - | 1.01E-03 | 1.53E-02 |
| ↳ <a href="#">organic cyclic compound metabolic process</a>                | <a href="#">2218</a> | <a href="#">23</a> | 43.63 | .53   | - | 6.32E-04 | 1.04E-02 |
| ↳ <a href="#">organonitrogen compound metabolic process</a>                | <a href="#">2527</a> | <a href="#">95</a> | 49.71 | 1.91  | + | 9.28E-10 | 1.60E-07 |
| ↳ <a href="#">heterocycle metabolic process</a>                            | <a href="#">2151</a> | <a href="#">23</a> | 42.31 | .54   | - | 1.30E-03 | 1.91E-02 |
| ↳ <a href="#">nucleobase-containing compound metabolic process</a>         | <a href="#">2112</a> | <a href="#">22</a> | 41.55 | .53   | - | 8.87E-04 | 1.37E-02 |
| <a href="#">chemokine-mediated signaling pathway</a>                       | <a href="#">35</a>   | <a href="#">8</a>  | .69   | 11.62 | + | 1.44E-06 | 8.52E-05 |

|                                                                             |                      |                    |       |       |   |          |          |
|-----------------------------------------------------------------------------|----------------------|--------------------|-------|-------|---|----------|----------|
| <a href="#">cellular response to chemokine</a>                              | <a href="#">36</a>   | <a href="#">8</a>  | .71   | 11.30 | + | 1.74E-06 | 9.68E-05 |
| ↳ <a href="#">response to chemokine</a>                                     | <a href="#">36</a>   | <a href="#">8</a>  | .71   | 11.30 | + | 1.74E-06 | 9.43E-05 |
| ↳ <a href="#">response to cytokine</a>                                      | <a href="#">162</a>  | <a href="#">11</a> | 3.19  | 3.45  | + | 5.59E-04 | 9.46E-03 |
| ↳ <a href="#">response to organic substance</a>                             | <a href="#">558</a>  | <a href="#">24</a> | 10.98 | 2.19  | + | 5.71E-04 | 9.59E-03 |
| ↳ <a href="#">cellular response to organic substance</a>                    | <a href="#">488</a>  | <a href="#">20</a> | 9.60  | 2.08  | + | 2.72E-03 | 3.41E-02 |
| ↳ <a href="#">cytokine-mediated signaling pathway</a>                       | <a href="#">119</a>  | <a href="#">8</a>  | 2.34  | 3.42  | + | 3.28E-03 | 3.96E-02 |
| <a href="#">membrane protein proteolysis</a>                                | <a href="#">14</a>   | <a href="#">3</a>  | .28   | 10.89 | + | 3.97E-03 | 4.55E-02 |
| ↳ <a href="#">proteolysis</a>                                               | <a href="#">693</a>  | <a href="#">44</a> | 13.63 | 3.23  | + | 3.62E-11 | 1.87E-08 |
| ↳ <a href="#">protein metabolic process</a>                                 | <a href="#">2115</a> | <a href="#">78</a> | 41.61 | 1.87  | + | 1.16E-07 | 9.54E-06 |
| <a href="#">response to interleukin-1</a>                                   | <a href="#">29</a>   | <a href="#">6</a>  | .57   | 10.52 | + | 5.03E-05 | 1.19E-03 |
| <a href="#">lymphocyte migration</a>                                        | <a href="#">30</a>   | <a href="#">6</a>  | .59   | 10.17 | + | 5.94E-05 | 1.36E-03 |
| <a href="#">positive regulation of ERK1 and ERK2 cascade</a>                | <a href="#">37</a>   | <a href="#">6</a>  | .73   | 8.24  | + | 1.66E-04 | 3.33E-03 |
| ↳ <a href="#">regulation of cellular protein metabolic process</a>          | <a href="#">533</a>  | <a href="#">21</a> | 10.49 | 2.00  | + | 4.06E-03 | 4.61E-02 |
| ↳ <a href="#">regulation of protein metabolic process</a>                   | <a href="#">581</a>  | <a href="#">23</a> | 11.43 | 2.01  | + | 2.23E-03 | 2.97E-02 |
| ↳ <a href="#">regulation of ERK1 and ERK2 cascade</a>                       | <a href="#">38</a>   | <a href="#">6</a>  | .75   | 8.03  | + | 1.89E-04 | 3.61E-03 |
| <a href="#">ERK1 and ERK2 cascade</a>                                       | <a href="#">38</a>   | <a href="#">6</a>  | .75   | 8.03  | + | 1.89E-04 | 3.58E-03 |
| ↳ <a href="#">cellular protein metabolic process</a>                        | <a href="#">1711</a> | <a href="#">65</a> | 33.66 | 1.93  | + | 5.45E-07 | 3.52E-05 |
| <a href="#">developmental growth</a>                                        | <a href="#">51</a>   | <a href="#">8</a>  | 1.00  | 7.97  | + | 1.69E-05 | 4.84E-04 |
| ↳ <a href="#">growth</a>                                                    | <a href="#">55</a>   | <a href="#">8</a>  | 1.08  | 7.39  | + | 2.75E-05 | 7.29E-04 |
| <a href="#">glucose metabolic process</a>                                   | <a href="#">26</a>   | <a href="#">4</a>  | .51   | 7.82  | + | 2.52E-03 | 3.21E-02 |
| <a href="#">chaperone-mediated protein folding</a>                          | <a href="#">26</a>   | <a href="#">4</a>  | .51   | 7.82  | + | 2.52E-03 | 3.19E-02 |
| ↳ <a href="#">protein folding</a>                                           | <a href="#">81</a>   | <a href="#">16</a> | 1.59  | 10.04 | + | 5.33E-11 | 1.83E-08 |
| <a href="#">cellular response to tumor necrosis factor</a>                  | <a href="#">35</a>   | <a href="#">5</a>  | .69   | 7.26  | + | 9.86E-04 | 1.50E-02 |
| ↳ <a href="#">response to tumor necrosis factor</a>                         | <a href="#">39</a>   | <a href="#">5</a>  | .77   | 6.52  | + | 1.53E-03 | 2.17E-02 |
| <a href="#">muscle contraction</a>                                          | <a href="#">43</a>   | <a href="#">6</a>  | .85   | 7.09  | + | 3.45E-04 | 6.09E-03 |
| ↳ <a href="#">muscle system process</a>                                     | <a href="#">45</a>   | <a href="#">6</a>  | .89   | 6.78  | + | 4.31E-04 | 7.47E-03 |
| <a href="#">negative regulation of endopeptidase activity</a>               | <a href="#">82</a>   | <a href="#">11</a> | 1.61  | 6.82  | + | 1.79E-06 | 9.48E-05 |
| ↳ <a href="#">negative regulation of peptidase activity</a>                 | <a href="#">87</a>   | <a href="#">11</a> | 1.71  | 6.43  | + | 3.02E-06 | 1.35E-04 |
| ↳ <a href="#">negative regulation of hydrolase activity</a>                 | <a href="#">102</a>  | <a href="#">12</a> | 2.01  | 5.98  | + | 2.14E-06 | 1.05E-04 |
| ↳ <a href="#">regulation of hydrolase activity</a>                          | <a href="#">287</a>  | <a href="#">17</a> | 5.65  | 3.01  | + | 9.59E-05 | 2.04E-03 |
| ↳ <a href="#">negative regulation of catalytic activity</a>                 | <a href="#">169</a>  | <a href="#">12</a> | 3.32  | 3.61  | + | 2.17E-04 | 4.03E-03 |
| ↳ <a href="#">negative regulation of molecular function</a>                 | <a href="#">196</a>  | <a href="#">12</a> | 3.86  | 3.11  | + | 7.58E-04 | 1.21E-02 |
| ↳ <a href="#">regulation of peptidase activity</a>                          | <a href="#">112</a>  | <a href="#">11</a> | 2.20  | 4.99  | + | 2.70E-05 | 7.24E-04 |
| ↳ <a href="#">regulation of proteolysis</a>                                 | <a href="#">155</a>  | <a href="#">12</a> | 3.05  | 3.94  | + | 1.02E-04 | 2.08E-03 |
| ↳ <a href="#">negative regulation of proteolysis</a>                        | <a href="#">88</a>   | <a href="#">11</a> | 1.73  | 6.35  | + | 3.34E-06 | 1.47E-04 |
| ↳ <a href="#">negative regulation of cellular protein metabolic process</a> | <a href="#">164</a>  | <a href="#">12</a> | 3.23  | 3.72  | + | 1.67E-04 | 3.31E-03 |
| ↳ <a href="#">negative regulation of protein metabolic process</a>          | <a href="#">168</a>  | <a href="#">13</a> | 3.30  | 3.93  | + | 5.30E-05 | 1.23E-03 |
| ↳ <a href="#">regulation of endopeptidase activity</a>                      | <a href="#">107</a>  | <a href="#">11</a> | 2.10  | 5.23  | + | 1.83E-05 | 5.17E-04 |
| <a href="#">regulation of cellular response to growth factor stimulus</a>   | <a href="#">30</a>   | <a href="#">4</a>  | .59   | 6.78  | + | 4.01E-03 | 4.57E-02 |
| <a href="#">actin filament bundle assembly</a>                              | <a href="#">31</a>   | <a href="#">4</a>  | .61   | 6.56  | + | 4.46E-03 | 4.97E-02 |
| <a href="#">actin filament polymerization</a>                               | <a href="#">74</a>   | <a href="#">9</a>  | 1.46  | 6.18  | + | 3.17E-05 | 8.19E-04 |
| ↳ <a href="#">protein polymerization</a>                                    | <a href="#">89</a>   | <a href="#">9</a>  | 1.75  | 5.14  | + | 1.18E-04 | 2.38E-03 |
| ↳ <a href="#">actin polymerization or depolymerization</a>                  | <a href="#">79</a>   | <a href="#">11</a> | 1.55  | 7.08  | + | 1.29E-06 | 8.05E-05 |
| <a href="#">tissue morphogenesis</a>                                        | <a href="#">43</a>   | <a href="#">5</a>  | .85   | 5.91  | + | 2.26E-03 | 2.99E-02 |
| <a href="#">positive regulation of cell migration</a>                       | <a href="#">43</a>   | <a href="#">5</a>  | .85   | 5.91  | + | 2.26E-03 | 2.97E-02 |
| ↳ <a href="#">regulation of cell migration</a>                              | <a href="#">79</a>   | <a href="#">7</a>  | 1.55  | 4.50  | + | 1.37E-03 | 2.00E-02 |
| ↳ <a href="#">regulation of cell motility</a>                               | <a href="#">86</a>   | <a href="#">7</a>  | 1.69  | 4.14  | + | 2.16E-03 | 2.93E-02 |
| ↳ <a href="#">regulation of locomotion</a>                                  | <a href="#">91</a>   | <a href="#">7</a>  | 1.79  | 3.91  | + | 2.91E-03 | 3.57E-02 |
| ↳ <a href="#">regulation of cellular component movement</a>                 | <a href="#">93</a>   | <a href="#">7</a>  | 1.83  | 3.83  | + | 3.26E-03 | 3.95E-02 |
| ↳ <a href="#">positive regulation of cell motility</a>                      | <a href="#">47</a>   | <a href="#">5</a>  | .92   | 5.41  | + | 3.22E-03 | 3.94E-02 |
| ↳ <a href="#">positive regulation of cellular component movement</a>        | <a href="#">48</a>   | <a href="#">5</a>  | .94   | 5.30  | + | 3.50E-03 | 4.18E-02 |
| ↳ <a href="#">positive regulation of locomotion</a>                         | <a href="#">48</a>   | <a href="#">5</a>  | .94   | 5.30  | + | 3.50E-03 | 4.16E-02 |

|                                                                                   |                       |                     |        |      |   |          |          |
|-----------------------------------------------------------------------------------|-----------------------|---------------------|--------|------|---|----------|----------|
| <a href="#">negative regulation of cell death</a>                                 | <a href="#">54</a>    | <a href="#">6</a>   | 1.06   | 5.65 | + | 1.03E-03 | 1.54E-02 |
| ↳ <a href="#">regulation of cell death</a>                                        | <a href="#">123</a>   | <a href="#">8</a>   | 2.42   | 3.31 | + | 3.96E-03 | 4.57E-02 |
| <a href="#">cell-substrate adhesion</a>                                           | <a href="#">45</a>    | <a href="#">5</a>   | .89    | 5.65 | + | 2.71E-03 | 3.41E-02 |
| ↳ <a href="#">cell adhesion</a>                                                   | <a href="#">288</a>   | <a href="#">15</a>  | 5.67   | 2.65 | + | 8.68E-04 | 1.37E-02 |
| ↳ <a href="#">biological adhesion</a>                                             | <a href="#">288</a>   | <a href="#">15</a>  | 5.67   | 2.65 | + | 8.68E-04 | 1.36E-02 |
| <a href="#">inflammatory response</a>                                             | <a href="#">115</a>   | <a href="#">12</a>  | 2.26   | 5.30 | + | 6.65E-06 | 2.25E-04 |
| <a href="#">response to endoplasmic reticulum stress</a>                          | <a href="#">65</a>    | <a href="#">6</a>   | 1.28   | 4.69 | + | 2.48E-03 | 3.20E-02 |
| <a href="#">peptidyl-lysine modification</a>                                      | <a href="#">91</a>    | <a href="#">7</a>   | 1.79   | 3.91 | + | 2.91E-03 | 3.59E-02 |
| <a href="#">cell morphogenesis involved in differentiation</a>                    | <a href="#">181</a>   | <a href="#">12</a>  | 3.56   | 3.37 | + | 3.90E-04 | 6.81E-03 |
| ↳ <a href="#">cell morphogenesis</a>                                              | <a href="#">255</a>   | <a href="#">14</a>  | 5.02   | 2.79 | + | 7.90E-04 | 1.25E-02 |
| ↳ <a href="#">cellular component morphogenesis</a>                                | <a href="#">281</a>   | <a href="#">15</a>  | 5.53   | 2.71 | + | 6.84E-04 | 1.12E-02 |
| <a href="#">oxidation-reduction process</a>                                       | <a href="#">220</a>   | <a href="#">14</a>  | 4.33   | 3.23 | + | 1.95E-04 | 3.67E-03 |
| <a href="#">proteasome-mediated ubiquitin-dependent protein catabolic process</a> | <a href="#">194</a>   | <a href="#">12</a>  | 3.82   | 3.14 | + | 6.97E-04 | 1.12E-02 |
| ↳ <a href="#">proteasomal protein catabolic process</a>                           | <a href="#">205</a>   | <a href="#">12</a>  | 4.03   | 2.98 | + | 1.10E-03 | 1.62E-02 |
| ↳ <a href="#">proteolysis involved in cellular protein catabolic process</a>      | <a href="#">331</a>   | <a href="#">25</a>  | 6.51   | 3.84 | + | 3.27E-08 | 3.06E-06 |
| ↳ <a href="#">cellular protein catabolic process</a>                              | <a href="#">333</a>   | <a href="#">25</a>  | 6.55   | 3.82 | + | 3.64E-08 | 3.13E-06 |
| ↳ <a href="#">cellular macromolecule catabolic process</a>                        | <a href="#">429</a>   | <a href="#">27</a>  | 8.44   | 3.20 | + | 2.99E-07 | 2.13E-05 |
| ↳ <a href="#">macromolecule catabolic process</a>                                 | <a href="#">463</a>   | <a href="#">30</a>  | 9.11   | 3.29 | + | 3.55E-08 | 3.18E-06 |
| ↳ <a href="#">cellular catabolic process</a>                                      | <a href="#">765</a>   | <a href="#">39</a>  | 15.05  | 2.59 | + | 1.44E-07 | 1.14E-05 |
| ↳ <a href="#">protein catabolic process</a>                                       | <a href="#">355</a>   | <a href="#">28</a>  | 6.98   | 4.01 | + | 1.98E-09 | 2.73E-07 |
| ↳ <a href="#">organonitrogen compound catabolic process</a>                       | <a href="#">457</a>   | <a href="#">32</a>  | 8.99   | 3.56 | + | 2.14E-09 | 2.76E-07 |
| ↳ <a href="#">ubiquitin-dependent protein catabolic process</a>                   | <a href="#">276</a>   | <a href="#">13</a>  | 5.43   | 2.39 | + | 4.26E-03 | 4.81E-02 |
| ↳ <a href="#">modification-dependent protein catabolic process</a>                | <a href="#">285</a>   | <a href="#">14</a>  | 5.61   | 2.50 | + | 2.14E-03 | 2.93E-02 |
| ↳ <a href="#">modification-dependent macromolecule catabolic process</a>          | <a href="#">290</a>   | <a href="#">14</a>  | 5.70   | 2.45 | + | 2.49E-03 | 3.19E-02 |
| <a href="#">enzyme linked receptor protein signaling pathway</a>                  | <a href="#">213</a>   | <a href="#">11</a>  | 4.19   | 2.63 | + | 4.34E-03 | 4.87E-02 |
| <a href="#">peptide metabolic process</a>                                         | <a href="#">286</a>   | <a href="#">14</a>  | 5.63   | 2.49 | + | 2.21E-03 | 2.98E-02 |
| Unclassified                                                                      | <a href="#">12808</a> | <a href="#">208</a> | 251.96 | .83  | - | 3.21E-05 | 8.19E-04 |
| <a href="#">transport</a>                                                         | <a href="#">1822</a>  | <a href="#">18</a>  | 35.84  | .50  | - | 1.03E-03 | 1.53E-02 |
| ↳ <a href="#">establishment of localization</a>                                   | <a href="#">1847</a>  | <a href="#">19</a>  | 36.33  | .52  | - | 1.98E-03 | 2.80E-02 |
| <a href="#">regulation of transcription by RNA polymerase II</a>                  | <a href="#">745</a>   | <a href="#">3</a>   | 14.66  | .20  | - | 5.83E-04 | 9.71E-03 |
| ↳ <a href="#">regulation of transcription, DNA-templated</a>                      | <a href="#">1117</a>  | <a href="#">4</a>   | 21.97  | .18  | - | 5.63E-06 | 2.00E-04 |
| ↳ <a href="#">regulation of gene expression</a>                                   | <a href="#">1368</a>  | <a href="#">7</a>   | 26.91  | .26  | - | 6.75E-06 | 2.25E-04 |
| ↳ <a href="#">regulation of nucleic acid-templated transcription</a>              | <a href="#">1117</a>  | <a href="#">4</a>   | 21.97  | .18  | - | 5.63E-06 | 1.97E-04 |
| ↳ <a href="#">regulation of RNA biosynthetic process</a>                          | <a href="#">1117</a>  | <a href="#">4</a>   | 21.97  | .18  | - | 5.63E-06 | 1.94E-04 |
| ↳ <a href="#">regulation of RNA metabolic process</a>                             | <a href="#">1222</a>  | <a href="#">7</a>   | 24.04  | .29  | - | 6.67E-05 | 1.50E-03 |
| ↳ <a href="#">regulation of nucleobase-containing compound metabolic process</a>  | <a href="#">1263</a>  | <a href="#">7</a>   | 24.85  | .28  | - | 3.50E-05 | 8.60E-04 |
| ↳ <a href="#">regulation of cellular biosynthetic process</a>                     | <a href="#">1234</a>  | <a href="#">6</a>   | 24.28  | .25  | - | 1.64E-05 | 4.82E-04 |
| ↳ <a href="#">regulation of biosynthetic process</a>                              | <a href="#">1240</a>  | <a href="#">6</a>   | 24.39  | .25  | - | 1.67E-05 | 4.85E-04 |
| ↳ <a href="#">regulation of macromolecule biosynthetic process</a>                | <a href="#">1223</a>  | <a href="#">5</a>   | 24.06  | .21  | - | 5.08E-06 | 1.84E-04 |
| ↳ <a href="#">regulation of cellular macromolecule biosynthetic process</a>       | <a href="#">1216</a>  | <a href="#">5</a>   | 23.92  | .21  | - | 4.95E-06 | 1.89E-04 |
| <a href="#">transcription by RNA polymerase II</a>                                | <a href="#">772</a>   | <a href="#">3</a>   | 15.19  | .20  | - | 2.84E-04 | 5.14E-03 |
| ↳ <a href="#">transcription, DNA-templated</a>                                    | <a href="#">1159</a>  | <a href="#">4</a>   | 22.80  | .18  | - | 2.77E-06 | 1.27E-04 |
| ↳ <a href="#">nucleic acid-templated transcription</a>                            | <a href="#">1159</a>  | <a href="#">4</a>   | 22.80  | .18  | - | 2.77E-06 | 1.30E-04 |
| ↳ <a href="#">RNA biosynthetic process</a>                                        | <a href="#">1166</a>  | <a href="#">4</a>   | 22.94  | .17  | - | 1.89E-06 | 9.76E-05 |
| ↳ <a href="#">macromolecule biosynthetic process</a>                              | <a href="#">1636</a>  | <a href="#">16</a>  | 32.18  | .50  | - | 2.04E-03 | 2.85E-02 |
| ↳ <a href="#">nucleobase-containing compound biosynthetic process</a>             | <a href="#">1376</a>  | <a href="#">7</a>   | 27.07  | .26  | - | 6.78E-06 | 2.22E-04 |
| ↳ <a href="#">cellular nitrogen compound biosynthetic process</a>                 | <a href="#">1644</a>  | <a href="#">16</a>  | 32.34  | .49  | - | 2.07E-03 | 2.87E-02 |
| ↳ <a href="#">aromatic compound biosynthetic process</a>                          | <a href="#">1399</a>  | <a href="#">7</a>   | 27.52  | .25  | - | 4.87E-06 | 1.90E-04 |
| ↳ <a href="#">organic cyclic compound biosynthetic process</a>                    | <a href="#">1433</a>  | <a href="#">7</a>   | 28.19  | .25  | - | 2.46E-06 | 1.18E-04 |
| ↳ <a href="#">heterocycle biosynthetic process</a>                                | <a href="#">1399</a>  | <a href="#">7</a>   | 27.52  | .25  | - | 4.87E-06 | 1.93E-04 |
| ↳ <a href="#">RNA metabolic process</a>                                           | <a href="#">1673</a>  | <a href="#">12</a>  | 32.91  | .36  | - | 3.01E-05 | 7.88E-04 |
| ↳ <a href="#">nucleic acid metabolic process</a>                                  | <a href="#">1911</a>  | <a href="#">13</a>  | 37.59  | .35  | - | 3.51E-06 | 1.51E-04 |

|                                                              |                      |                    |       |        |   |          |          |
|--------------------------------------------------------------|----------------------|--------------------|-------|--------|---|----------|----------|
| ↳cellular macromolecule biosynthetic process                 | <a href="#">1628</a> | <a href="#">16</a> | 32.03 | .50    | - | 2.03E-03 | 2.85E-02 |
| positive regulation of transcription, DNA-templated          | <a href="#">421</a>  | <a href="#">1</a>  | 8.28  | .12    | - | 3.89E-03 | 4.53E-02 |
| ↳positive regulation of nucleic acid-templated transcription | <a href="#">421</a>  | <a href="#">1</a>  | 8.28  | .12    | - | 3.89E-03 | 4.56E-02 |
| ↳positive regulation of RNA biosynthetic process             | <a href="#">421</a>  | <a href="#">1</a>  | 8.28  | .12    | - | 3.89E-03 | 4.51E-02 |
| ↳positive regulation of macromolecule biosynthetic process   | <a href="#">451</a>  | <a href="#">1</a>  | 8.87  | .11    | - | 2.74E-03 | 3.41E-02 |
| nervous system process                                       | <a href="#">320</a>  | <a href="#">0</a>  | 6.30  | < 0.01 | - | 3.37E-03 | 4.04E-02 |

[PANTHER 15.0 released!](#)

Analysis Summary: Please report in publication [?](#) **vWAT-MSC secretome from HFD mice**

**Analysis Type:** PANTHER Overrepresentation Test (Released 20190711)

---

**Annotation Version and Release Date:** PANTHER version 15 Released 2020-02-14

---

**Analyzed List:** Client Text Box Input (Mus musculus) [Change](#)

---

**Reference List:** Mus musculus (all genes in database) [Change](#)

---

**Annotation Data Set:**  [?](#)

---

**Test Type:**  Fisher's Exact  Binomial

---

**Correction:**  Calculate False Discovery Rate  Use the Bonferroni correction for multiple testing [?](#)  No correction

Results [?](#)

|                               | Reference list                     | Client Text Box Input          |
|-------------------------------|------------------------------------|--------------------------------|
| Uniquely Mapped IDs:          | <a href="#">22265</a> out of 22265 | <a href="#">377</a> out of 378 |
| Unmapped IDs:                 | <a href="#">0</a>                  | <a href="#">3</a>              |
| Multiple mapping information: | <a href="#">0</a>                  | <a href="#">10</a>             |

Export [Table](#) [XML with user input ids](#) [JSON with user input ids](#) View:

Displaying only results for FDR P < 0.05, [click here to display all results](#)

|                                                                                   | Mus musculus (REF)    |                     | Client Text Box Input |                 |     |             |          |
|-----------------------------------------------------------------------------------|-----------------------|---------------------|-----------------------|-----------------|-----|-------------|----------|
| PANTHER Pathways                                                                  | #                     | #                   | expected              | Fold Enrichment | +/- | raw P value | FDR      |
| <a href="#">Pentose phosphate pathway</a>                                         | <a href="#">9</a>     | <a href="#">4</a>   | .15                   | 26.18           | +   | 4.85E-05    | 1.34E-03 |
| <a href="#">Glycolysis</a>                                                        | <a href="#">26</a>    | <a href="#">8</a>   | .44                   | 18.12           | +   | 6.96E-08    | 2.31E-06 |
| <a href="#">Parkinson disease</a>                                                 | <a href="#">95</a>    | <a href="#">18</a>  | 1.61                  | 11.16           | +   | 5.39E-13    | 2.98E-11 |
| <a href="#">De novo purine biosynthesis</a>                                       | <a href="#">29</a>    | <a href="#">5</a>   | .49                   | 10.16           | +   | 2.36E-04    | 4.89E-03 |
| <a href="#">Cytoskeletal regulation by Rho GTPase</a>                             | <a href="#">79</a>    | <a href="#">13</a>  | 1.34                  | 9.69            | +   | 4.33E-09    | 1.80E-07 |
| <a href="#">Integrin signalling pathway</a>                                       | <a href="#">190</a>   | <a href="#">24</a>  | 3.23                  | 7.44            | +   | 2.12E-13    | 1.76E-11 |
| <a href="#">Huntington disease</a>                                                | <a href="#">150</a>   | <a href="#">11</a>  | 2.55                  | 4.32            | +   | 8.66E-05    | 2.05E-03 |
| <a href="#">Inflammation mediated by chemokine and cytokine signaling pathway</a> | <a href="#">258</a>   | <a href="#">13</a>  | 4.38                  | 2.97            | +   | 6.79E-04    | 1.25E-02 |
| Unclassified                                                                      | <a href="#">19669</a> | <a href="#">266</a> | 333.93                | .80             | -   | 1.51E-20    | 2.51E-18 |

[PANTHER 15.0 released!](#)

Analysis Summary: Please report in publication [? SWAT-MSC secretome from HFD mice](#)

**Analysis Type:** PANTHER Overrepresentation Test (Released 20190711)

---

**Annotation Version and Release Date:** PANTHER version 15 Released 2020-02-14

---

**Analyzed List:** Client Text Box Input (Mus musculus) [Change](#)

---

**Reference List:** Mus musculus (all genes in database) [Change](#)

---

**Annotation Data Set:** PANTHER Pathways [?](#)

---

**Test Type:**  Fisher's Exact  Binomial

---

**Correction:**  Calculate False Discovery Rate  Use the Bonferroni correction for multiple testing [?](#)  No correction

Results [?](#)

|                               | Reference list                     | Client Text Box Input          |
|-------------------------------|------------------------------------|--------------------------------|
| Uniquely Mapped IDs:          | <a href="#">22265</a> out of 22265 | <a href="#">506</a> out of 505 |
| Unmapped IDs:                 | <a href="#">0</a>                  | <a href="#">4</a>              |
| Multiple mapping information: | <a href="#">0</a>                  | <a href="#">8</a>              |

Export [Table](#) [XML with user input ids](#) [JSON with user input ids](#) View: -- Please select a chart to display --

Displaying only results for FDR P < 0.05, [click here to display all results](#)

|                                                                                   | Mus musculus (REF)    |                     | Client Text Box Input |                 |     |             |          |
|-----------------------------------------------------------------------------------|-----------------------|---------------------|-----------------------|-----------------|-----|-------------|----------|
| PANTHER Pathways                                                                  | #                     | #                   | expected              | Fold Enrichment | +/- | raw P value | FDR      |
| <a href="#">Pentose phosphate pathway</a>                                         | <a href="#">9</a>     | <a href="#">4</a>   | .20                   | 19.60           | +   | 1.46E-04    | 2.20E-03 |
| <a href="#">Glycolysis</a>                                                        | <a href="#">26</a>    | <a href="#">8</a>   | .59                   | 13.57           | +   | 6.05E-07    | 2.01E-05 |
| <a href="#">Plasminogen activating cascade</a>                                    | <a href="#">17</a>    | <a href="#">4</a>   | .39                   | 10.37           | +   | 1.06E-03    | 1.35E-02 |
| <a href="#">Parkinson disease</a>                                                 | <a href="#">95</a>    | <a href="#">21</a>  | 2.15                  | 9.75            | +   | 1.11E-13    | 6.17E-12 |
| <a href="#">De novo purine biosynthesis</a>                                       | <a href="#">29</a>    | <a href="#">6</a>   | .66                   | 9.12            | +   | 1.09E-04    | 1.80E-03 |
| <a href="#">Cytoskeletal regulation by Rho GTPase</a>                             | <a href="#">79</a>    | <a href="#">16</a>  | 1.79                  | 8.93            | +   | 2.98E-10    | 1.24E-08 |
| <a href="#">Blood coagulation</a>                                                 | <a href="#">51</a>    | <a href="#">9</a>   | 1.16                  | 7.78            | +   | 6.54E-06    | 1.81E-04 |
| <a href="#">Axon guidance mediated by semaphorins</a>                             | <a href="#">23</a>    | <a href="#">4</a>   | .52                   | 7.67            | +   | 2.80E-03    | 2.90E-02 |
| <a href="#">Integrin signalling pathway</a>                                       | <a href="#">190</a>   | <a href="#">33</a>  | 4.31                  | 7.66            | +   | 5.64E-18    | 4.68E-16 |
| <a href="#">Axon guidance mediated by Slit/Robo</a>                               | <a href="#">24</a>    | <a href="#">4</a>   | .54                   | 7.35            | +   | 3.21E-03    | 3.13E-02 |
| <a href="#">FGF signaling pathway</a>                                             | <a href="#">120</a>   | <a href="#">12</a>  | 2.72                  | 4.41            | +   | 3.90E-05    | 8.10E-04 |
| <a href="#">Huntington disease</a>                                                | <a href="#">150</a>   | <a href="#">14</a>  | 3.40                  | 4.11            | +   | 1.85E-05    | 4.38E-04 |
| <a href="#">EGF receptor signaling pathway</a>                                    | <a href="#">136</a>   | <a href="#">11</a>  | 3.08                  | 3.57            | +   | 4.51E-04    | 6.24E-03 |
| <a href="#">Inflammation mediated by chemokine and cytokine signaling pathway</a> | <a href="#">258</a>   | <a href="#">18</a>  | 5.85                  | 3.08            | +   | 4.94E-05    | 9.10E-04 |
| <a href="#">CCKR signaling map</a>                                                | <a href="#">159</a>   | <a href="#">11</a>  | 3.61                  | 3.05            | +   | 1.50E-03    | 1.66E-02 |
| <a href="#">Gonadotropin-releasing hormone receptor pathway</a>                   | <a href="#">236</a>   | <a href="#">14</a>  | 5.35                  | 2.62            | +   | 1.47E-03    | 1.75E-02 |
| Unclassified                                                                      | <a href="#">19669</a> | <a href="#">353</a> | 446.12                | .79             | -   | 7.17E-28    | 1.19E-25 |

[PANTHER 15.0 released!](#)

Analysis Summary: Please report in publication [BM-MSC secretome from HFD mice](#)

**Analysis Type:** PANTHER Overrepresentation Test (Released 20190711)

---

**Annotation Version and Release Date:** PANTHER version 15 Released 2020-02-14

---

**Analyzed List:** Client Text Box Input (Mus musculus) [Change](#)

---

**Reference List:** Mus musculus (all genes in database) [Change](#)

---

**Annotation Data Set:**  [?](#)

---

**Test Type:**  Fisher's Exact  Binomial

---

**Correction:**  Calculate False Discovery Rate  Use the Bonferroni correction for multiple testing [?](#)  No correction

Results [?](#)

|                               | Reference list                     | Client Text Box Input          |
|-------------------------------|------------------------------------|--------------------------------|
| Uniquely Mapped IDs:          | <a href="#">22265</a> out of 22265 | <a href="#">438</a> out of 438 |
| Unmapped IDs:                 | <a href="#">0</a>                  | <a href="#">3</a>              |
| Multiple mapping information: | <a href="#">0</a>                  | <a href="#">9</a>              |

Export [Table](#) [XML with user input ids](#) [JSON with user input ids](#) View:

Displaying only results for FDR P < 0.05, [click here to display all results](#)

|                                                                                   | Mus musculus (REF)    |                     | Client Text Box Input |                 |     |             |          |
|-----------------------------------------------------------------------------------|-----------------------|---------------------|-----------------------|-----------------|-----|-------------|----------|
| PANTHER Pathways                                                                  | #                     | #                   | expected              | Fold Enrichment | +/- | raw P value | FDR      |
| <a href="#">Pentose phosphate pathway</a>                                         | <a href="#">9</a>     | <a href="#">4</a>   | .18                   | 22.59           | +   | 8.51E-05    | 1.57E-03 |
| <a href="#">Glycolysis</a>                                                        | <a href="#">26</a>    | <a href="#">8</a>   | .51                   | 15.64           | +   | 2.11E-07    | 8.74E-06 |
| <a href="#">Plasminogen activating cascade</a>                                    | <a href="#">17</a>    | <a href="#">5</a>   | .33                   | 14.95           | +   | 5.25E-05    | 1.09E-03 |
| <a href="#">Parkinson disease</a>                                                 | <a href="#">95</a>    | <a href="#">17</a>  | 1.87                  | 9.10            | +   | 5.24E-11    | 2.90E-09 |
| <a href="#">Blood coagulation</a>                                                 | <a href="#">51</a>    | <a href="#">9</a>   | 1.00                  | 8.97            | +   | 2.11E-06    | 5.84E-05 |
| <a href="#">Integrin signalling pathway</a>                                       | <a href="#">190</a>   | <a href="#">30</a>  | 3.74                  | 8.03            | +   | 4.22E-17    | 3.50E-15 |
| <a href="#">Cytoskeletal regulation by Rho GTPase</a>                             | <a href="#">79</a>    | <a href="#">11</a>  | 1.55                  | 7.08            | +   | 1.29E-06    | 4.27E-05 |
| <a href="#">Alzheimer disease-presenilin pathway</a>                              | <a href="#">125</a>   | <a href="#">9</a>   | 2.46                  | 3.66            | +   | 1.19E-03    | 1.98E-02 |
| <a href="#">Inflammation mediated by chemokine and cytokine signaling pathway</a> | <a href="#">258</a>   | <a href="#">17</a>  | 5.08                  | 3.35            | +   | 2.76E-05    | 6.55E-04 |
| Unclassified                                                                      | <a href="#">19669</a> | <a href="#">314</a> | 386.93                | .81             | -   | 1.07E-20    | 1.78E-18 |
